30 **ABSTRACT**

31 Sensorimotor transformation, a process that converts sensory stimuli into motor actions,  
32 is critical for the brain to initiate behaviors. Although the circuitry involved in sensorimotor  
33 transformation has been well delineated, the molecular logic behind this process remains  
34 poorly understood. Here, we performed high-throughput and circuit-specific single-cell  
35 transcriptomic analyses of neurons in the superior colliculus (SC), a midbrain structure  
36 implicated in early sensorimotor transformation. We found that SC neurons in distinct  
37 laminae express discrete marker genes. Of particular interest, *Cbln2* and *Pitx2* are key  
38 markers that define glutamatergic projection neurons in the optic nerve (Op) and  
39 intermediate gray (InG) layers, respectively. The *Cbln2*<sup>+</sup> neurons responded to visual  
40 stimuli mimicking cruising predators, while the *Pitx2*<sup>+</sup> neurons encoded prey-derived  
41 vibrissal tactile cues. By forming distinct input and output connections with other brain  
42 areas, these neuronal subtypes independently mediate behaviors of predator avoidance  
43 and prey capture. Our results reveal that, in the midbrain, sensorimotor transformation  
44 for different behaviors may be performed by separate circuit modules that are  
45 molecularly defined by distinct transcriptomic codes.

46

## 47 INTRODUCTION

48       Sensorimotor transformation is a fundamental process in which the brain converts  
49 sensory information into motor command (Crochet et al., 2019; Franklin and Wolpert,  
50 2011; Pouget and Snyder, 2000). The critical role of this process in sensory-guided  
51 behaviors has been demonstrated in diverse animal models, including fish (Bianco and  
52 Engert, 2015; Chen et al., 2018; Helmbrecht et al., 2018), rodents (Felsen and Mainen,  
53 2008; Huda et al., 2020; Mayrhofer et al., 2019; Oliveira and Yonehara, 2018; Wang et  
54 al., 2020a), and primates (Buneo et al., 2002; Cavanaugh et al., 2012; Sparks, 1986).  
55 Although the brain circuits and computational models of sensorimotor transformation  
56 have been intensively studied, the molecular and genetic logic behind this process  
57 remains elusive.

58       Single-cell RNA sequencing (scRNA-seq) and single-nucleus RNA sequencing  
59 (snRNA-seq) are powerful approaches to identify the genes expressed in individual cells  
60 (Liu et al., 2020; Shapiro et al., 2013; Tang et al., 2009; Zhong et al., 2020; Zhong et al.,  
61 2018), enabling us to understand the cellular diversity and gene expression profiles of a  
62 specific brain region (Economo et al., 2018; Saunders et al., 2018; Zeisel et al., 2018).  
63 Moreover, by combining scRNA-seq with tools for circuit analysis, one should be able to  
64 link the transcriptomic heterogeneity to other characteristics of neurons such as their  
65 electrophysiological properties (Foldy et al., 2016), spatial distribution (Eng et al., 2019;  
66 Moffitt et al., 2018; Shah et al., 2016), neuronal activity (Hrvatin et al., 2018; Liu et al.,  
67 2020; Wu et al., 2017) and projection specificity (Tasic et al., 2018). Thus, scRNA-seq  
68 may provide an opportunity to explore the molecular and genetic logic of sensorimotor  
69 transformation.

70       In the mammalian brain, the superior colliculus (SC) is a midbrain structure for early  
71 sensorimotor transformation (Basso and May, 2017; Cang et al., 2018). The superficial  
72 layers of the SC, including the superficial grey layer (SuG) and the optic nerve layer (Op),  
73 are involved in visual information processing (De Franceschi and Solomon, 2018; Gale

74 and Murphy, 2014; Wang et al., 2010). The deep layers of the SC, including the  
75 intermediate layer and deep layer, participate in processing of tactile and auditory  
76 information (Cohen et al., 2008; Drager and Hubel, 1975). The deep layers of the SC  
77 control eye movement (Sparks, 1986; Wang et al., 2015), head movement (Isa and  
78 Sasaki, 2002; Wilson et al., 2018), and locomotion (Felsen and Mainen, 2008). From a  
79 neuroethological perspective, the sensorimotor transformations that occur in the SC  
80 enable it to orchestrate distinct behavioral actions in predator avoidance and prey  
81 capture (Dean et al., 1989; Oliveira and Yonehara, 2018). However, how different  
82 neuronal subtypes participate in these survival behaviors and the molecular features of  
83 these neurons remain unknown.

84 In the present study, by performing high-throughput and circuit-specific single-cell  
85 transcriptomic analyses of cells in the SC, we systematically studied the molecular  
86 markers of SC neurons, sensory response properties, input-output connectivity and their  
87 behavioral relevance. We found that *Cbln2*<sup>+</sup> and *Pitx2*<sup>+</sup> SC neurons form part of two  
88 distinct sets of circuit modules for sensorimotor transformation related to behaviors of  
89 predator avoidance and prey capture. Our data suggest that sensorimotor transformation  
90 for different behaviors may be performed by separate circuit modules that are  
91 molecularly defined by distinct transcriptomic codes.

92

## 93 **RESULTS**

### 94 **A census of SC cell types using snRNA-seq**

95 To understand the cell diversity of the SC, snRNA-seq of mouse SC was performed  
96 using the 10X Genomics Chromium Platform. From two experimental replicates, each  
97 containing six superior colliculi, 14,892 single-cell gene expression profiles were  
98 collected (Figures 1A, S1A, S1B; Table S1). In total, we found 9 major types of cells  
99 identified by the expression of classic marker genes; these were excitatory neurons,  
100 inhibitory neurons, astrocytes, oligodendrocyte progenitor cells (OPCs),  
101 oligodendrocytes, microglia, endothelial cells, ciliated cells and meningeal cells (Figures  
102 1B, S1C). To further investigate neural diversity, we divided the excitatory and inhibitory  
103 neurons into 9 and 10 subclusters, respectively, each of which displayed a distinctive  
104 transcriptomic profile (Figure 1A, C, D; Table S2). The differentially expressed genes  
105 (DEGs) expressed by the cells in these subsets indicate that subclusters In-5 and In-10  
106 are Calb1+ and Reln+ interneurons, respectively (Figure 1D).

107 Since the superior colliculus possesses a layered structure with a variety of circuit  
108 connections(ref), we next asked whether the subsets of neurons we identified are  
109 located in specific layers. To answer this question, we developed a method of spatial  
110 classification of mRNA expression data (SPACED)  
111 (<https://github.com/xiaoqunwang-lab/SPACED>; also see the methods section for details)  
112 through which we were able to assign a location score to each neural subset by  
113 analyzing RNA in situ hybridization images of the top DEGs in each subset from Allen  
114 Brain Atlas (<https://mouse.brain-map.org>) (Figures 1E, F, S1D). Using this method, a  
115 specificity score and the statistical significance were calculated for each subset, and it  
116 was found that the subsets of excitatory neurons and inhibitory neurons exhibited  
117 distinctive specificities for different layers of the SC (Figure 1E-G). Cells of subsets  
118 Ex-5/7/8/9 and In-2/7/8/10 were assigned to the superficial gray matter (SuG) layer,  
119 while cells in the Ex-3/6 and In-3 subsets highly expressed genes localized in the optic

120 nerve (Op) layer. In addition, Ex-1/4 and In-4 cells exhibited high spatial scores for the  
121 intermediate gray and white (InG/InWh) layers (Figures 1E-G and S1D) ( $P < 0.05$ ).  
122 Although several neural subsets also showed relatively high spatial scores for certain  
123 layers, the data for those subsets did not meet the criteria for statistical significance,  
124 indicating that some neurons might be located in multiple layers. We next analyzed the  
125 Gene Ontology (GO) enrichment of the DEGs of cells that we assigned to different layers  
126 (Figure 1H). Intriguingly, the GO terms suggest that predicted SuG layer cells may play  
127 roles in visual learning and cognition, consistent with previous findings that cells in this  
128 layer receive signals from the retina and the visual cortex (Sparks, 1986). The GO  
129 analysis also indicated that cells that are predicted in the Op layer may be involved in  
130 defense and fear responses, while cells that are predicted in the InG layer may play roles  
131 in locomotor behavior (Figure 1H). These data suggest that neurons with diverse and  
132 distinctive transcriptomic profiles may be located in different layers of the SC.

### 133 **Electrophysiological properties of LPTN- and ZI-projecting SC neurons**

134 Several populations of glutamatergic neurons in the SC show distinctive projection  
135 patterns (Dean et al., 1989). To accurately visualize layer-specific neuronal projection  
136 patterns from the SC to downstream brain regions, we utilized a recently developed  
137 sparse-labeling strategy (Lin et al., 2018). We injected a mixture of AAV into the SC of  
138 vGlut2-IRES-Cre mice (Figure 2A) and performed morphological connectivity  
139 reconstruction by image tracing of individual cells (M-CRITIC)  
140 (<https://github.com/xiaoqunwang-lab/M-CRITIC>; also see the methods section for  
141 details). The complete morphological structure was reconstructed from multiple  
142 consecutive two-photon image-tracing stacks after alignment and was registered to the  
143 Allen Common Coordinate Framework (Figure 2B, Movie S1). One neuron with a cell  
144 body in the Op layer and dendritic ramifications in the SuG and Op layers extended its  
145 axon in the LPTN. Another neuron showed dendrites restricted to InG/InWh layer and a  
146 branched axon reaching the ZI (Figure 2C). To map how LPTN-projecting neurons are

147 distributed in the SC, we injected AAV2-retro-DIO-EGFP into the LPTN of  
148 vGlut2-IRES-Cre mice (Figure 2D). Retrogradely labeled EGFP<sup>+</sup> SC neurons were  
149 predominantly localized within the Op layer (Figure 2E). With a similar strategy, we  
150 labeled ZI-projecting SC neurons with EGFP; these neurons are distributed in the  
151 InG/InWh and DpG layers of the SC (Figure 2F and 2G).

152 To compare the electrophysiological properties of these two neuronal populations,  
153 we performed whole-cell current-clamp recordings from LPTN-projecting and  
154 ZI-projecting SC neurons in acute SC slices (Figure S2A). These two populations of SC  
155 projection neurons did not show significant differences in resting membrane potential  
156 (Figure S2B) or firing threshold (Figure S2C). The number of action potentials fired by  
157 LPTN-projecting and ZI-projecting neurons in response to membrane depolarization also  
158 did not show a significant difference (Figure S2D and S2E). These data suggest that  
159 LPTN-projecting and ZI-projecting neurons are similar in their electrophysiological  
160 properties and that they cannot be distinguished using traditional electrophysiological  
161 measurements.

### 162 **Projection-specific single-cell transcriptomic analysis**

163 Next, we prepared acute SC slices and collected EGFP<sup>+</sup> cells from the SC for  
164 patch-seq experiments (Cadwell et al., 2016b; Liu et al., 2020). In total, 78 cells were  
165 collected; 60 of these cells, including 21 LPTN-projecting neurons from the Op layer and  
166 39 ZI-projecting neurons from the InG layer, passed the quality control test, with a  
167 median number of 7,746 gene expressed per cell (Figure S2F, S2G; Table S3).  
168 Examination of classic markers indicated that these cells were vGlut-expressing neurons  
169 and the neurons with different projections were clustered separately (Figure 2H),  
170 indicating that neurons with the same circuit connections may have similar innate gene  
171 expression profiles. We then further analyzed the DEGs of these two neuronal  
172 populations. The InG layer neurons projecting to ZI with soma in the SC highly  
173 expressed *Pitx2*, *Vwc2*, *Gsg1l*, *Clstn2*, and other genes, while LPTN-projecting Op layer

174 neurons highly expressed *Cbln2*, *Grm8*, *Zfp385b*, *Dgkh*, and other genes (Figure 2I, 2J,  
175 S2H, S2I; Table S4). On examination of the high-throughput snRNA-sequencing data,  
176 we found that 2 excitatory neuron subsets (Ex-3, 6) were assigned to the Op layer and 2  
177 subsets (Ex-1, 4) belonged to the InG layer (Figure 1G). Transcriptomic correlation  
178 analysis indicated that Op-LPTN neurons and InG-ZI neurons identified through  
179 Patch-seq were similar to cells of the Ex-6 and Ex-4 subsets, respectively, in terms of  
180 their cellular gene expression profiles (Figure 2K). We next analyzed the DEGs of two  
181 subsets of cells from the Op layer (Ex-3 vs. Ex6) and the InG layer (Ex-1 vs. Ex-4)  
182 (Figure 2L, 2M; Table S5). We found that some projection-specific genes were restricted  
183 to one subset of cells (Figures 2L-N, S2J). For example, as a marker gene of Op-LPTN  
184 projection neurons, *Cbln2* was expressed in both Ex-3 and Ex-6 cells, while *Dgkh* was  
185 only highly expressed in Ex-6 cells (Figure 2L, 2N). Among genes that were specifically  
186 expressed in InG-ZI projection neurons, *Pitx2* was exclusively expressed in Ex-4  
187 neurons, but *Vwc2* was expressed in both subsets of neurons (Figure 2M, 2N). These  
188 data suggest that the projection-specific SC neurons represent subpopulations of  
189 neurons in specific SC layers that can be distinguished by their gene expression profiles.

### 190 **Roles of *Cbln2*<sup>+</sup> and *Pitx2*<sup>+</sup> SC neurons in sensory-triggered behaviors related to** 191 **predator avoidance and prey capture**

192 *Cbln2* and *Pitx2* were highly expressed in LPTN-projecting and ZI-projecting SC  
193 neurons, respectively (Figure 2I), which also displayed the highest fidelity of Op and InG  
194 layer specificity based on our analysis of in situ RNA hybridization images from Allen  
195 Brain Atlas (<https://mouse.brain-map.org>) (Figure S3A). To examine whether *Cbln2* acts  
196 as a key molecular marker of SC circuits associated with predator avoidance, we  
197 generated *Cbln2*-IRES-Cre mouse line (Figure S3B, S3C). We first tested whether it is  
198 possible to specifically label *Cbln2*<sup>+</sup> SC neurons in *Cbln2*-IRES-Cre mice by injecting  
199 AAV-DIO-EGFP into the SC of these mice. EGFP-expressing neurons were distributed  
200 predominantly in the Op layer of the SC (Figure 3A). More than 90% of



201 EGFP-expressing SC neurons were positive for *Cbln2* mRNA ( $91\% \pm 9\%$ ,  $n=3$  mice),  
202 and SC neurons expressing *Cbln2* mRNA were predominantly positive for EGFP ( $92\% \pm$   
203  $11\%$ ,  $n=3$  mice), suggesting that it is possible to specifically label *Cbln2*<sup>+</sup> neurons in the  
204 SC of *Cbln2*-IRES-Cre mice (Figure 3B). In addition, EGFP-expressing SC neurons were  
205 mostly positive for *vGlut2* mRNA ( $93\% \pm 6\%$ ,  $n=3$  mice), and very few were positive for  
206 *vGAT* mRNA ( $4\% \pm 2.1\%$ ,  $n=3$  mice), confirming that the *Cbln2*<sup>+</sup> SC neurons were  
207 predominantly glutamatergic (Figure S3D).

208 Under laboratory conditions, mice exhibit a freezing response to an overhead  
209 moving visual target; this is an innate behavior that may be crucial to the avoidance of  
210 aerial predators in the natural environment (De Franceschi et al., 2016). We assessed  
211 the role of *Cbln2*<sup>+</sup> SC neurons in this behavior (Figure 3C) by selectively silencing  
212 *Cbln2*<sup>+</sup> SC neurons using tetanus neurotoxin (TeNT) (Schiavo et al., 1992).  
213 AAV-DIO-EGFP-2A-TeNT was bilaterally injected into the SC of *Cbln2*-IRES-Cre mice,  
214 resulting in the expression of EGFP and TeNT in *Cbln2*<sup>+</sup> SC neurons (Figure S3E). The  
215 effectiveness and specificity of TeNT-mediated synaptic inactivation of SC neurons have  
216 been validated in earlier studies (Shang et al., 2018; Shang et al., 2019). We found that  
217 control mice with *Cbln2*<sup>+</sup> SC neurons expressing EGFP (Ctrl) exhibited freezing in  
218 response to an overhead moving visual target (Movie S2; black trace in Figure 3D). In  
219 contrast, synaptic inactivation of *Cbln2*<sup>+</sup> SC neurons by TeNT strongly impaired visually  
220 evoked freezing responses (Movie S2; red trace in Figure 3D). Quantitative analyses  
221 indicated that synaptic inactivation of *Cbln2*<sup>+</sup> SC neurons caused a significant increase  
222 in locomotion speed during visual stimuli but not before or after visual stimuli (Figure 3,  
223 E-G). However, inactivation of *Cbln2*<sup>+</sup> SC neurons did not alter the efficiency of  
224 predatory hunting (Figure S3, F-I). These data suggest that *Cbln2*<sup>+</sup> SC neurons are  
225 selectively required for a visually evoked freezing response in mice.

226 To examine whether *Pitx2* acts as a key molecular marker of SC circuits for prey  
227 capture, we studied the *Pitx2*-Cre knock-in line (Liu et al., 2003). We first examined

228 whether it is possible to specifically label Pitx2<sup>+</sup> SC neurons in Pitx2-Cre mice by  
229 injecting AAV-DIO-EGFP into the SC of these mice. EGFP-expressing neurons were  
230 distributed predominantly in the intermediate layers of the SC (Figure 3H). Most  
231 EGFP-expressing SC neurons were positive for *Pitx2* mRNA (88% ± 8%, n=3 mice), and  
232 SC neurons expressing *Pitx2* mRNA were predominantly positive for EGFP (89% ± 9%,  
233 n=3 mice), suggesting that Pitx2<sup>+</sup> SC neurons were specifically labeled in Pitx2-Cre  
234 mice (Figure 3I). Moreover, most EGFP-expressing SC neurons were positive for *vGlut2*  
235 mRNA (95% ± 7%, n=3 mice), and very few were positive for *vGAT* mRNA (6% ± 2.5%,  
236 n=3 mice), confirming that Pitx2<sup>+</sup> SC neurons are predominantly glutamatergic (Figure  
237 S3J).

238 To explore the role of Pitx2<sup>+</sup> SC neurons in prey capture (Figure 3J), we injected  
239 AAV-DIO-EGFP-2A-TeNT into the SC of Pitx2-Cre mice; this resulted in the expression  
240 of EGFP and TeNT in Pitx2<sup>+</sup> SC neurons (Figure S3K). Synaptic inactivation of Pitx2<sup>+</sup>  
241 SC neurons impaired prey capture (Movie S3; Figure 3K) by increasing the latency to  
242 attack (Figure 3L), prolonging the time required for prey capture (Figure 3M), and  
243 reducing the frequency of attack (Figure 3N). However, the visually evoked freezing  
244 response was not impaired in these mice, as evidenced by a lack of significant changes  
245 in locomotion speed before, during or after the presentation of visual stimuli (Figure S3,  
246 L-O). These data suggest that Pitx2<sup>+</sup> SC neurons are selectively required for prey  
247 capture behavior in mice.

#### 248 **Cbln2<sup>+</sup> and Pitx2<sup>+</sup> SC neurons encode distinct sensory stimuli**

249 Next, we addressed how Cbln2<sup>+</sup> and Pitx2<sup>+</sup> SC neurons participate in predator  
250 avoidance and prey capture. Rodents use vision to detect aerial predators (De  
251 Franceschi et al., 2016; Yilmaz and Meister, 2013), whereas they use vibrissal tactile  
252 information (Anjum et al., 2006) and vision (Hoy et al., 2016) for prey capture. To  
253 examine whether Cbln2<sup>+</sup> and Pitx2<sup>+</sup> SC neurons process visual and vibrissal tactile  
254 information, we expressed GCaMP7 in these neurons and implanted an optical fiber

255 above the neurons (Figure 4, A and B) (Dana et al., 2019; Gunaydin et al., 2014). We  
256 provided visual and vibrissal tactile stimuli to head-fixed mice standing on a treadmill and  
257 simultaneously performed fiber photometry to record GCaMP fluorescence in these  
258 neurons (Figure 4C). The visual stimulus was a computer-generated black circle (5° or  
259 25° in diameter) moving at a controlled velocity (32°/s or 128°/s) across the visual  
260 receptive field (RF) on a tangent screen (Shang et al., 2019). The vibrissal tactile stimuli,  
261 which were designed to mimic the tactile cues produced by moving prey, were brief  
262 gentle air puffs (100 ms, 0~40 p.s.i.) directed toward the vibrissal region contralateral or  
263 ipsilateral to the recorded side (Shang et al., 2019).

264 We found that the centers of the visual receptive fields of Cbln2+ SC neurons were  
265 distributed predominantly in the dorsal quadrants of the visual field (Figure S4A). These  
266 neurons responded broadly to visual stimuli moving in various directions, with a  
267 preference for the temporal-to-nasal direction (Figure 4, D and H). In addition, they  
268 responded more strongly to circles moving at lower velocity (Figure 4, E and I) and those  
269 with smaller diameters (Figure 4, F and J). However, the Cbln2+ SC neurons did not  
270 respond to air puffs applied to the vibrissal area (Figure S4B). Unlike Cbln2+ SC neurons,  
271 Pitx2+ SC neurons responded to air puffs directed toward the vibrissal region  
272 contralateral to the recorded side (Figure 4, G and K). However, they did not respond to  
273 moving visual stimuli (Figure S4, C-E). These data indicate that Cbln2+ SC neurons may  
274 specifically process visual information derived from an aerial cruising predator, while  
275 Pitx2+ SC neurons may be selectively involved in processing vibrissal tactile stimuli  
276 mimicking moving prey. Thus, Cbln2+ and Pitx2+ SC neurons may comprise two distinct  
277 sets of circuit modules that are used to detect visual cues produced by aerial predator  
278 and vibrissal cues produced by terrestrial prey of mice.

### 279 **Cbln2+ and Pitx2+ SC neurons receive distinct monosynaptic inputs**

280 Next, we performed monosynaptic retrograde tracing using recombinant rabies virus  
281 (RV) (Wickersham et al., 2007) to examine how Cbln2+ and Pitx2+ SC neurons are

282 connected with neural structures associated with sensory information processing (Figure  
283 5, A-C; Figure S5, A and B). A brain-wide survey revealed a number of monosynaptic  
284 projections to Cbln2+ and Pitx2+ SC neurons (Figure 5, D-G; Figure S5, C-F). First,  
285 Cbln2+ SC neurons are monosynaptically innervated by a subset of retinal ganglion cells  
286 in the contralateral retina (Figure 5D) and neurons in layer 5 of the ipsilateral primary  
287 visual cortex (V1) (Figure 5E). In contrast, Pitx2+ SC neurons did not receive  
288 monosynaptic inputs from these visual structures (Figure 5D and 5E). Second, Pitx2+  
289 SC neurons, but not Cbln2+ SC neurons, receive robust monosynaptic inputs from the  
290 subnuclei of the trigeminal complex (Pr5 and Sp5) (Figure 5F; Figure S5C), the primary  
291 somatosensory cortex (S1) (Figure 5G), and the ZI (Figure S5D), which are involved in  
292 processing tactile information. Third, Pitx2+ SC neurons, but not Cbln2+ SC neurons,  
293 also receive monosynaptic inputs from motor-related brain areas (e.g., SNr and M1/M2)  
294 (Figure S5, E and F) and the cingulate cortex (Cg1/2) (Figure S5F). Quantitative analysis  
295 of retrogradely labeled cells in various brain areas indicated that Cbln2+ and Pitx2+ SC  
296 neurons may receive two sets of presynaptic inputs that are mutually exclusive (Figure  
297 5H). These morphological data support the hypothesis that Cbln2+ and Pitx2+ SC  
298 neurons belong to two distinct sets of circuit modules that are used to detect visual cues  
299 produced by aerial predators (retina and V1) and tactile cues produced by terrestrial prey  
300 (Pr5, Sp5, S1 and ZI) of mice.

### 301 **Target-specific projections of Cbln2+ and Pitx2+ SC neurons**

302 To map the efferent projections of Cbln2+ and Pitx2+ SC neurons, we injected  
303 AAV-DIO-EGFP into Cbln2-IRES-Cre and Pitx2-IRES-Cre mice, resulting in the  
304 expression of EGFP in Cbln2+ and Pitx2+ neurons in the SC (Figure 6, A and B). In the  
305 LPTN, we found strong EGFP+ axonal projections from Cbln2+ SC neurons but not from  
306 Pitx2+ SC neurons (Figure 6C). Quantitative analyses of EGFP fluorescence indicated  
307 that the density of EGFP+ axons from Cbln2+ SC neurons was significantly higher than  
308 that from Pitx2+ SC neurons in the LPTN (Figure 6D). These data suggest that Cbln2+

309 SC neurons, but not Pitx2+ SC neurons, send strong projections to the LPTN. Similarly,  
310 in the ZI, we found strong EGFP+ axonal projections from Pitx2+ SC neurons but not  
311 from Cbln2+ SC neurons (Figure 6E). Quantitative analysis of the EGFP fluorescence  
312 indicated that, in the ZI, the density of EGFP+ axons from Pitx2+ SC neurons was  
313 significantly higher than that of EGFP+ axons from Cbln2+ SC neurons (Figure 6F).  
314 These data suggest that Pitx2+ SC neurons, but not Cbln2+ SC neurons, send strong  
315 projections to the ZI.

316 We also explored the target-specific projections of Cbln2+ and Pitx2+ SC neurons  
317 using retrograde AAV (Tervo et al., 2016). AAV2-retro-DIO-EGFP was injected into the  
318 LPTN of Cbln2-IRES-Cre mice, followed by injection of AAV-DIO-mCherry into the SC  
319 (Figure 6G). More than 80% of mCherry+ SC neurons ( $83\% \pm 9\%$ , n=3 mice) were  
320 labeled by EGFP, suggesting that a large proportion of Cbln2+ SC neurons project to the  
321 LPTN (Figure 6, H and I). We injected AAV2-retro-DIO-EGFP into the ZI of Pitx2-Cre  
322 mice, followed by injection of AAV-DIO-mCherry into the SC (Figure 6J). More than  
323 two-thirds of mCherry+ SC neurons ( $72\% \pm 11\%$ , n=3 mice) were labeled by EGFP,  
324 suggesting that a large proportion of Pitx2+ neurons project to the ZI (Figure 6, K and L).

325 We also compared the brain-wide projections of Cbln2+ and Pitx2+ SC neurons  
326 (Figure S6A). In addition to the LPTN and the ZI, Cbln2+ and Pitx2+ SC neurons also  
327 sent descending projections to a number of areas in the midbrain, pons and medulla.  
328 Strikingly, their divergent projection targets rarely overlap (Figure S6, B-F), supporting  
329 the hypothesis that these two subtypes of SC neurons are functionally distinct.

### 330 **Activation of the Cbln2+ SC-LPTN pathway and the Pitx2+ SC-ZI pathway**

331 The above data indicate that Cbln2+ and Pitx2+ neurons in the SC selectively  
332 project to the LPTN and to the ZI, respectively. To test the behavioral relevance of the  
333 Cbln2+ SC-LPTN pathway, we injected AAV-DIO-ChR2-mCherry into the SC of  
334 Cbln2-IRES-Cre mice (Boyden et al., 2005), followed by implantation of an optical fiber  
335 above the LPTN (Figure 7A). In acute SC slices, light stimulation (10 Hz or 20 Hz, 2 ms,

336 10 pulses) effectively evoked action potential firing by neurons expressing  
337 ChR2-mCherry (Figure S7, A and B). We found that light stimulation of ChR2-mCherry+  
338 axon terminals of Cbln2+ SC neurons in the LPTN induced a freezing response in mice  
339 (Movie S4; Figure 7, B and C), as evidenced by a selective reduction of locomotion  
340 speed during light stimulation (Figure 7D). However, activation of this pathway did not  
341 alter the efficiency of prey capture during predatory hunting (Figure S7, D and E). These  
342 data indicate that activation of the Cbln2+ SC-LPTN pathway selectively triggers  
343 predator avoidance rather than prey capture.

344 Next, we examined the behavioral relevance of the Pitx2+ SC-ZI pathway.  
345 AAV-DIO-ChR2-mCherry was injected into the SC of Pitx2-Cre mice, followed by  
346 implantation of an optical fiber above the ZI (Figure 7E). In acute SC slices, light  
347 stimulation (10 Hz or 20 Hz, 2 ms, 10 pulses) evoked phase-locked action potential firing  
348 by neurons expressing ChR2-mCherry (Figure S7C). Photostimulation of  
349 ChR2-mCherry+ axon terminals of Pitx2+ SC neurons in the ZI did not evoke a freezing  
350 response (Figure S7, F and G). However, activation of this pathway promoted predatory  
351 hunting (Movie S5; Figure 7, F and G) by decreasing the latency to hunt (Figure 7H),  
352 reducing the time required for prey capture (Figure 7I), and increasing the frequency of  
353 predatory attacks (Figure 7J). These data indicate that activation of the Pitx2+ SC-ZI  
354 pathway selectively promotes prey capture without inducing predator avoidance.

355

## 356 **DISCUSSION**

357       The SC of the midbrain is a classical model for the study of early sensorimotor  
358 transformation related to sensory-triggered innate behaviors (fish (Bianco and Engert,  
359 2015); rodents (Dean et al., 1989); primates (Sparks, 1986)). In mice, a series of  
360 projection-defined SC circuits have been linked to sensory-triggered innate behaviors  
361 such as predator avoidance (Evans et al., 2018; Shang et al., 2018; Shang et al., 2015;  
362 Wei et al., 2015; Zhou et al., 2019) and prey capture (Hoy et al., 2019; Shang et al.,  
363 2019). However, the number of cell types in the SC, their molecular signatures, their  
364 projection patterns, and their functional roles in these behaviors remain unclear. Here,  
365 we used a combined approach consisting of single-cell transcriptomic analysis and  
366 circuit analysis to address the above questions.

367       Using high-throughput single-cell transcriptomic analyses, we first systematically  
368 analyzed the cell-type diversity of the SC. We found that the majority of neuronal  
369 subtypes defined by gene expression patterns showed layer-specific distribution in the  
370 SC (Figure 1). To better understand the correlation between projection patterns and  
371 transcriptomics, we performed projection-specific scRNA-Seq of cells in the SC-LPTN  
372 and SC-ZI pathways and identified *Cbln2* and *Pitx2* as key molecular markers for SC  
373 neurons with different projections (Figure 2). *Cbln2*<sup>+</sup> and *Pitx2*<sup>+</sup> SC neurons, distributed  
374 in distinct layers of the SC, are functionally involved in predator avoidance and prey  
375 capture behavior, respectively (Figure 3). Strikingly, these two neuronal subtypes  
376 process neuroethological information received through distinct sensory modalities  
377 (Figure 4) and are connected to almost completely different sets of input-output synaptic  
378 connectomes (Figures 5 and 6). Finally, activation of the *Cbln2*<sup>+</sup> SC-LPTN and the  
379 *Pitx2*<sup>+</sup> SC-ZI pathways copied the behavioral phenotypes of SC-LPTN and SC-ZI  
380 pathways (Figure 7).

381       We believe our data allow two conclusions. First, they reveal that it is the

382 transcriptomically-defined neuronal subtypes and their projections, when combined  
383 together, define early sensorimotor transformation and the subsequent behavior (Figure  
384 7K and 7L). This finding supports the hypothesis that transcriptomically-defined circuit  
385 modules correspond to specific behaviors. Previous studies of this “correspondence”  
386 question in the hypothalamus and prefrontal cortex, two brain areas that are involved in  
387 the regulation of motivation and cognition, did not find a clear correspondence between  
388 transcriptomically defined neurons and behaviors (Kim et al., 2019; Lui et al., 2021;  
389 Moffitt et al., 2018). In combination with these pioneering studies, our results suggest  
390 that the circuit design of sensorimotor transformation in the midbrain, which requires  
391 precise detection of sensory features and rapid initiation of innate behaviors, may differ  
392 from the circuit design in brain areas that are responsible for complex information  
393 processing such as that related to the regulation of motivation and cognition.

394         Second, our data identified *Cbln2* and *Pitx2* as discrete markers that label neurons  
395 in the Op and InG layers of the SC. Intriguingly, we found three Op subtypes (2 subtypes  
396 of excitatory neurons; 1 subtype of inhibitory neurons) and three InG/InWh subtypes (2  
397 subtypes of excitatory neurons; 1 subtype of inhibitory neurons) in our unsupervised  
398 high-throughput single-cell transcriptome and spatial information analyses. *Cbln2* was  
399 extensively expressed by two subtypes of Op layer excitatory neurons, but *Pitx2* was  
400 expressed by only one subtype of InG layer excitatory neurons, indicating the  
401 heterogeneity of neurons located in different SC layers. Our data also suggest that  
402 neurons with similar transcriptomic profiles may tend to participate in the same projection  
403 paths and to play a role in the regulation of behavior.

404         *Cbln2* and other members of the Cerebellin family are synaptic organizer molecules  
405 that bind to presynaptic neurexins and to postsynaptic receptors (Cheng et al., 2016).  
406 Recent studies have shown that *Cbln2* may participate in synapse formation (Matsuda  
407 and Yuzaki, 2011; Seigneur and Sudhof, 2018). It remains to be determined whether



408 Cbln2 in Cbln2-expressing SC neurons participates in the formation of the SC-LPTN  
409 pathway. As a transcription factor, Pitx2 participates in the migration of collicular neurons  
410 during brain development (Waite et al., 2013). In the adult brain, activation of Pitx2+ SC  
411 neurons elicited stereotyped head displacements in a body-referenced frame (Masullo et  
412 al., 2019). However, the functional role of Pitx2+ SC neurons in naturalistic behavioral  
413 context has not been demonstrated in this study. Our study has shown that Pitx2+ SC  
414 neurons specifically participate in predatory hunting, a goal-directed behavior that occurs  
415 in natural environment.

416 Our results also raise new questions. First, it is unclear how the genes expressed by  
417 Cbln2+ and Pitx2+ SC neurons participate in the formation and function of the Cbln2+  
418 SC-LPTN and Pitx2+ SC-ZI pathways. Single-cell transcriptomic analyses of Cbln2+ and  
419 Pitx2+ SC neurons at different developmental stages and genetic manipulations of these  
420 neurons may be performed to address this question. Second, the neural substrate that  
421 mediates the interactions between the two distinct circuit modules for predator avoidance  
422 and prey capture remains to be studied. With the identification of Cbln2+ and Pitx2+ SC  
423 neurons, their distinct input-output synaptic connectomes, and the demonstration of their  
424 roles in sensory-triggered innate behaviors in hand, these questions can now be  
425 addressed.

426

427 **AUTHOR CONTRIBUTIONS**

428 X.W., P.C. and Q. W. conceived the study, designed the experiments and wrote the  
429 manuscript. Z. L., Q. M. and J. Z. performed the snRNA-seq experiment. C. Z., L. S. and  
430 G. R. carried out the Patch-seq experiment. M. W. and Q. W. analyzed the RNA-seq data.  
431 Z. L., C.Z and L. S. did the neuron projection 3D reconstruction. J. Z. prepared the  
432 animal samples. Z.X., C.S., and M.H. performed viral injections and optical fiber  
433 implantations. Z.X. did fiber photometry recording and data analyses. Z.X. did rabies  
434 virus tracing and data analyses. H.G. and C.S. did behavioral tests and data analyses.  
435 Q.P. and Z.X. did immunohistochemistry and data analyses. H.G. did slice physiology.  
436 All authors edited and proofed the manuscript.

437 **ACKNOWLEDGMENTS**

438 We thank Karl Deisseroth for providing plasmids. We also thank the members of the  
439 Neuroscience Pioneer Club for valuable discussions. This work was supported by the  
440 National Key R&D Program of China (2019YFA0110100), the National Basic Research  
441 Program of China (2017YFA0102601, 2017YFA0103303), the Strategic Priority  
442 Research Program of the Chinese Academy of Sciences (XDA16020601,  
443 XDB32010100), the National Natural Science Foundation of China (NSFC) (31925019 to  
444 P.C. and 31771140, 81891001 to X. W.) , the BUAA-CCMU Big Data and Precision  
445 Medicine Advanced Innovation Center Project (BHME-2019001) to X. W, and the  
446 institutional grants from the Chinese Ministry of Science and Technology to NIBS.

447 **COMPETING FINANCIAL INTERESTS**

448 The authors declare no competing financial interests.

449

## 450 REFERENCES

- 451 Anjum, F., Turni, H., Mulder, P.G., van der Burg, J., and Brecht, M. (2006). Tactile guidance of prey capture in  
452 Etruscan shrews. *Proceedings of the National Academy of Sciences of the United States of America* *103*,  
453 16544-16549.
- 454 Basso, M.A., and May, P.J. (2017). Circuits for Action and Cognition: A View from the Superior Colliculus. *Annu Rev*  
455 *Vis Sci* *3*, 197-226.
- 456 Bianco, I.H., and Engert, F. (2015). Visuomotor transformations underlying hunting behavior in zebrafish. *Current*  
457 *biology* : *CB* *25*, 831-846.
- 458 Boyden, E.S., Zhang, F., Bamberg, E., Nagel, G., and Deisseroth, K. (2005). Millisecond-timescale, genetically  
459 targeted optical control of neural activity. *Nature neuroscience* *8*, 1263-1268.
- 460 Buneo, C.A., Jarvis, M.R., Batista, A.P., and Andersen, R.A. (2002). Direct visuomotor transformations for reaching.  
461 *Nature* *416*, 632-636.
- 462 Butler, A., Hoffman, P., Smibert, P., Papalexi, E., and Satija, R. (2018). Integrating single-cell transcriptomic data  
463 across different conditions, technologies, and species. *Nature biotechnology* *36*, 411-420.
- 464 Cadwell, C.R., Palasantza, A., Jiang, X., Berens, P., Deng, Q., Yilmaz, M., Reimer, J., Shen, S., Bethge, M., and Tolias,  
465 K.F. (2016a). Electrophysiological, transcriptomic and morphologic profiling of single neurons using Patch-seq.  
466 *Nature biotechnology* *34*, 199-203.
- 467 Cadwell, C.R., Palasantza, A., Jiang, X., Berens, P., Deng, Q., Yilmaz, M., Reimer, J., Shen, S., Bethge, M., Tolias, K.F.,  
468 *et al.* (2016b). Electrophysiological, transcriptomic and morphologic profiling of single neurons using Patch-seq.  
469 *Nature biotechnology* *34*, 199-203.
- 470 Cang, J., Savier, E., Barchini, J., and Liu, X. (2018). Visual Function, Organization, and Development of the Mouse  
471 Superior Colliculus. *Annu Rev Vis Sci* *4*, 239-262.
- 472 Cavanaugh, J., Monosov, I.E., McAlonan, K., Berman, R., Smith, M.K., Cao, V., Wang, K.H., Boyden, E.S., and Wurtz,  
473 R.H. (2012). Optogenetic inactivation modifies monkey visuomotor behavior. *Neuron* *76*, 901-907.
- 474 Chen, J., Cheng, M., Wang, L., Zhang, L., Xu, D., Cao, P., Wang, F., Herzog, H., Song, S., and Zhan, C. (2020). A  
475 Vagal-NTS Neural Pathway that Stimulates Feeding. *Current biology* : *CB* *30*, 3986-3998 e3985.
- 476 Chen, S., Huang, T., Zhou, Y., Han, Y., Xu, M., and Gu, J. (2017). AfterQC: automatic filtering, trimming, error  
477 removing and quality control for fastq data. *BMC bioinformatics* *18*, 91-100.
- 478 Chen, X., Mu, Y., Hu, Y., Kuan, A.T., Nikitchenko, M., Randlett, O., Chen, A.B., Gavornik, J.P., Sompolinsky, H., Engert,  
479 F., *et al.* (2018). Brain-wide Organization of Neuronal Activity and Convergent Sensorimotor Transformations in  
480 Larval Zebrafish. *Neuron* *100*, 876-890 e875.
- 481 Cheng, S., Seven, A.B., Wang, J., Skiniotis, G., and Ozkan, E. (2016). Conformational Plasticity in the Transsynaptic  
482 Neurexin-Cerebellin-Glutamate Receptor Adhesion Complex. *Structure* *24*, 2163-2173.
- 483 Cohen, J.D., Hirata, A., and Castro-Alamancos, M.A. (2008). Vibrissa sensation in superior colliculus: wide-field  
484 sensitivity and state-dependent cortical feedback. *The Journal of neuroscience* : the official journal of the  
485 Society for Neuroscience *28*, 11205-11220.
- 486 Crochet, S., Lee, S.H., and Petersen, C.C.H. (2019). Neural Circuits for Goal-Directed Sensorimotor Transformations.  
487 *Trends in neurosciences* *42*, 66-77.
- 488 Cusanovich, D.A., Hill, A.J., Aghamirzaie, D., Daza, R.M., Pliner, H.A., Berletch, J.B., Filippova, G.N., Huang, X.,  
489 Christiansen, L., and DeWitt, W.S. (2018). A single-cell atlas of in vivo mammalian chromatin accessibility. *Cell*  
490 *174*, 1309-1324. e1318.

491 Dana, H., Sun, Y., Mohar, B., Hulse, B.K., Kerlin, A.M., Hasseman, J.P., Tsegaye, G., Tsang, A., Wong, A., Patel, R., *et*  
492 *al.* (2019). High-performance calcium sensors for imaging activity in neuronal populations and  
493 microcompartments. *Nature methods* *16*, 649-657.

494 De Franceschi, G., and Solomon, S.G. (2018). Visual response properties of neurons in the superficial layers of the  
495 superior colliculus of awake mouse. *J Physiol* *596*, 6307-6332.

496 De Franceschi, G., Vivattanasarn, T., Saleem, A.B., and Solomon, S.G. (2016). Vision Guides Selection of Freeze or  
497 Flight Defense Strategies in Mice. *Current biology : CB* *26*, 2150-2154.

498 Dean, P., Redgrave, P., and Westby, G.W. (1989). Event or emergency? Two response systems in the mammalian  
499 superior colliculus. *Trends in neurosciences* *12*, 137-147.

500 Dobin, A., Davis, C.A., Schlesinger, F., Drenkow, J., Zaleski, C., Jha, S., Batut, P., Chaisson, M., and Gingeras, T.R.  
501 (2013). STAR: ultrafast universal RNA-seq aligner. *Bioinformatics* *29*, 15-21.

502 Drager, U.C., and Hubel, D.H. (1975). Responses to visual stimulation and relationship between visual, auditory,  
503 and somatosensory inputs in mouse superior colliculus. *Journal of neurophysiology* *38*, 690-713.

504 Economo, M.N., Viswanathan, S., Tasic, B., Bas, E., Winnubst, J., Menon, V., Graybiel, L.T., Nguyen, T.N., Smith,  
505 K.A., Yao, Z., *et al.* (2018). Distinct descending motor cortex pathways and their roles in movement. *Nature* *563*,  
506 79-84.

507 Eng, C.L., Lawson, M., Zhu, Q., Dries, R., Koulina, N., Takei, Y., Yun, J., Cronin, C., Karp, C., Yuan, G.C., *et al.* (2019).  
508 Transcriptome-scale super-resolved imaging in tissues by RNA seqFISH. *Nature* *568*, 235-239.

509 Evans, D.A., Stempel, A.V., Vale, R., Ruehle, S., Lefler, Y., and Branco, T. (2018). A synaptic threshold mechanism for  
510 computing escape decisions. *Nature* *558*, 590-594.

511 Felsen, G., and Mainen, Z.F. (2008). Neural substrates of sensory-guided locomotor decisions in the rat superior  
512 colliculus. *Neuron* *60*, 137-148.

513 Foldy, C., Darmanis, S., Aoto, J., Malenka, R.C., Quake, S.R., and Sudhof, T.C. (2016). Single-cell RNAseq reveals cell  
514 adhesion molecule profiles in electrophysiologically defined neurons. *Proceedings of the National Academy of*  
515 *Sciences of the United States of America* *113*, E5222-5231.

516 Franklin, D.W., and Wolpert, D.M. (2011). Computational mechanisms of sensorimotor control. *Neuron* *72*,  
517 425-442.

518 Gale, S.D., and Murphy, G.J. (2014). Distinct representation and distribution of visual information by specific cell  
519 types in mouse superficial superior colliculus. *The Journal of neuroscience : the official journal of the Society for*  
520 *Neuroscience* *34*, 13458-13471.

521 Gunaydin, L.A., Grosenick, L., Finkelstein, J.C., Kauvar, I.V., Fenno, L.E., Adhikari, A., Lammel, S., Mirzabekov, J.J.,  
522 Airan, R.D., Zalocusky, K.A., *et al.* (2014). Natural neural projection dynamics underlying social behavior. *Cell*  
523 *157*, 1535-1551.

524 Haghverdi, L., Lun, A.T., Morgan, M.D., and Marioni, J.C. (2018). Batch effects in single-cell RNA-sequencing data  
525 are corrected by matching mutual nearest neighbors. *Nature biotechnology* *36*, 421-427.

526 Helmbrecht, T.O., Dal Maschio, M., Donovan, J.C., Koutsouli, S., and Baier, H. (2018). Topography of a Visuomotor  
527 Transformation. *Neuron* *100*, 1429-1445 e1424.

528 Hoy, J.L., Bishop, H.I., and Niell, C.M. (2019). Defined Cell Types in Superior Colliculus Make Distinct Contributions  
529 to Prey Capture Behavior in the Mouse. *Current biology : CB* *29*, 4130-4138 e4135.

530 Hoy, J.L., Yavorska, I., Wehr, M., and Niell, C.M. (2016). Vision Drives Accurate Approach Behavior during Prey  
531 Capture in Laboratory Mice. *Current biology : CB* *26*, 3046-3052.

532 Hrvatin, S., Hochbaum, D.R., Nagy, M.A., Cicconet, M., Robertson, K., Cheadle, L., Zilionis, R., Ratner, A.,  
533 Borges-Monroy, R., Klein, A.M., *et al.* (2018). Single-cell analysis of experience-dependent transcriptomic states  
534 in the mouse visual cortex. *Nature neuroscience* *21*, 120-129.

535 Huda, R., Sipe, G.O., Breton-Provencher, V., Cruz, K.G., Pho, G.N., Adam, E., Gunter, L.M., Sullins, A., Wickersham,  
536 I.R., and Sur, M. (2020). Distinct prefrontal top-down circuits differentially modulate sensorimotor behavior.  
537 *Nature communications* *11*, 6007.

538 Isa, T., and Sasaki, S. (2002). Brainstem control of head movements during orienting: organization of the premotor  
539 circuits. *Progress in neurobiology* *66*, 205-241.

540 Kim, D.W., Yao, Z., Graybuck, L.T., Kim, T.K., Nguyen, T.N., Smith, K.A., Fong, O., Yi, L., Koulena, N., Pierson, N., *et al.*  
541 (2019). Multimodal Analysis of Cell Types in a Hypothalamic Node Controlling Social Behavior. *Cell* *179*, 713-728  
542 e717.

543 Liao, Y., Smyth, G.K., and Shi, W. (2014). featureCounts: an efficient general purpose program for assigning  
544 sequence reads to genomic features. *Bioinformatics* *30*, 923-930.

545 Lin, R., Wang, R., Yuan, J., Feng, Q., Zhou, Y., Zeng, S., Ren, M., Jiang, S., Ni, H., Zhou, C., *et al.* (2018).  
546 Cell-type-specific and projection-specific brain-wide reconstruction of single neurons. *Nature methods* *15*,  
547 1033-1036.

548 Liu, J., Wang, M., Sun, L., Pan, N.C., Zhang, C., Zhang, J., Zuo, Z., He, S., Wu, Q., and Wang, X. (2020). Integrative  
549 analysis of in vivo recording with single-cell RNA-seq data reveals molecular properties of light-sensitive  
550 neurons in mouse V1. *Protein & cell* *11*, 417-432.

551 Liu, W., Selever, J., Lu, M.F., and Martin, J.F. (2003). Genetic dissection of Pitx2 in craniofacial development  
552 uncovers new functions in branchial arch morphogenesis, late aspects of tooth morphogenesis and cell  
553 migration. *Development* *130*, 6375-6385.

554 Liu, Z., Chen, Z., Shang, C., Yan, F., Shi, Y., Zhang, J., Qu, B., Han, H., Wang, Y., Li, D., *et al.* (2017). IGF1-Dependent  
555 Synaptic Plasticity of Mitral Cells in Olfactory Memory during Social Learning. *Neuron* *95*, 106-122 e105.

556 Lui, J.H., Nguyen, N.D., Grutzner, S.M., Darmanis, S., Peixoto, D., Wagner, M.J., Allen, W.E., Kebschull, J.M.,  
557 Richman, E.B., Ren, J., *et al.* (2021). Differential encoding in prefrontal cortex projection neuron classes across  
558 cognitive tasks. *Cell* *184*, 489-506 e426.

559 Ma, Y., Zhang, L., and Huang, X. (2017). Building Cre Knockin Rat Lines Using CRISPR/Cas9. *Methods Mol Biol* *1642*,  
560 37-52.

561 Masullo, L., Mariotti, L., Alexandre, N., Freire-Pritchett, P., Boulanger, J., and Tripodi, M. (2019). Genetically  
562 Defined Functional Modules for Spatial Orienting in the Mouse Superior Colliculus. *Current biology : CB* *29*,  
563 2892-2904 e2898.

564 Matsuda, K., and Yuzaki, M. (2011). Cbln family proteins promote synapse formation by regulating distinct  
565 neurexin signaling pathways in various brain regions. *The European journal of neuroscience* *33*, 1447-1461.

566 Mayrhofer, J.M., El-Boustani, S., Foustoukos, G., Auffret, M., Tamura, K., and Petersen, C.C.H. (2019). Distinct  
567 Contributions of Whisker Sensory Cortex and Tongue-Jaw Motor Cortex in a Goal-Directed Sensorimotor  
568 Transformation. *Neuron* *103*, 1034-1043 e1035.

569 Moffitt, J.R., Bambah-Mukku, D., Eichhorn, S.W., Vaughn, E., Shekhar, K., Perez, J.D., Rubinstein, N.D., Hao, J.,  
570 Regev, A., Dulac, C., *et al.* (2018). Molecular, spatial, and functional single-cell profiling of the hypothalamic  
571 preoptic region. *Science* *362*.

572 Oliveira, A.F., and Yonehara, K. (2018). The Mouse Superior Colliculus as a Model System for Investigating Cell  
573 Type-Based Mechanisms of Visual Motor Transformation. *Frontiers in neural circuits* *12*, 59.

574 Picelli, S., Faridani, O.R., Björklund, Å.K., Winberg, G., Sagasser, S., and Sandberg, R. (2014). Full-length RNA-seq  
575 from single cells using Smart-seq2. *Nature protocols* *9*, 171-181.

576 Pouget, A., and Snyder, L.H. (2000). Computational approaches to sensorimotor transformations. *Nature*  
577 *neuroscience* *3 Suppl*, 1192-1198.

578 Saunders, A., Macosko, E.Z., Wysoker, A., Goldman, M., Krienen, F.M., de Rivera, H., Bien, E., Baum, M., Bortolin, L.,  
579 Wang, S., *et al.* (2018). Molecular Diversity and Specializations among the Cells of the Adult Mouse Brain. *Cell*  
580 *174*, 1015-1030 e1016.

581 Schiavo, G., Benfenati, F., Poulain, B., Rossetto, O., Polverino de Laureto, P., DasGupta, B.R., and Montecucco, C.  
582 (1992). Tetanus and botulinum-B neurotoxins block neurotransmitter release by proteolytic cleavage of  
583 synaptobrevin. *Nature* *359*, 832-835.

584 Seigneur, E., and Sudhof, T.C. (2018). Genetic Ablation of All Cerebellins Reveals Synapse Organizer Functions in  
585 Multiple Regions Throughout the Brain. *The Journal of neuroscience : the official journal of the Society for*  
586 *Neuroscience* *38*, 4774-4790.

587 Shah, S., Lubeck, E., Zhou, W., and Cai, L. (2016). In Situ Transcription Profiling of Single Cells Reveals Spatial  
588 Organization of Cells in the Mouse Hippocampus. *Neuron* *92*, 342-357.

589 Shang, C., Chen, Z., Liu, A., Li, Y., Zhang, J., Qu, B., Yan, F., Zhang, Y., Liu, W., Liu, Z., *et al.* (2018). Divergent  
590 midbrain circuits orchestrate escape and freezing responses to looming stimuli in mice. *Nature communications*  
591 *9*, 1232.

592 Shang, C., Liu, A., Li, D., Xie, Z., Chen, Z., Huang, M., Li, Y., Wang, Y., Shen, W.L., and Cao, P. (2019). A subcortical  
593 excitatory circuit for sensory-triggered predatory hunting in mice. *Nature neuroscience* *22*, 909-920.

594 Shang, C., Liu, Z., Chen, Z., Shi, Y., Wang, Q., Liu, S., Li, D., and Cao, P. (2015). BRAIN CIRCUITS. A  
595 parvalbumin-positive excitatory visual pathway to trigger fear responses in mice. *Science* *348*, 1472-1477.

596 Shapiro, E., Biezuner, T., and Linnarsson, S. (2013). Single-cell sequencing-based technologies will revolutionize  
597 whole-organism science. *Nat Rev Genet* *14*, 618-630.

598 Sparks, D.L. (1986). Translation of sensory signals into commands for control of saccadic eye movements: role of  
599 primate superior colliculus. *Physiological reviews* *66*, 118-171.

600 Stuart, T., Butler, A., Hoffman, P., Hafemeister, C., Papalexi, E., Mauck III, W.M., Hao, Y., Stoeckius, M., Smibert, P.,  
601 and Satija, R. (2019). Comprehensive integration of single-cell data. *Cell* *177*, 1888-1902. e1821.

602 Tang, F., Barbacioru, C., Wang, Y., Nordman, E., Lee, C., Xu, N., Wang, X., Bodeau, J., Tuch, B.B., Siddiqui, A., *et al.*  
603 (2009). mRNA-Seq whole-transcriptome analysis of a single cell. *Nature methods* *6*, 377-382.

604 Tasic, B., Yao, Z., Graybeck, L.T., Smith, K.A., Nguyen, T.N., Bertagnolli, D., Goldy, J., Garren, E., Economo, M.N.,  
605 Viswanathan, S., *et al.* (2018). Shared and distinct transcriptomic cell types across neocortical areas. *Nature* *563*,  
606 72-78.

607 Tervo, D.G., Hwang, B.Y., Viswanathan, S., Gaj, T., Lavzin, M., Ritola, K.D., Lindo, S., Michael, S., Kuleshova, E., Ojala,  
608 D., *et al.* (2016). A Designer AAV Variant Permits Efficient Retrograde Access to Projection Neurons. *Neuron* *92*,  
609 372-382.

610 Vong, L., Ye, C., Yang, Z., Choi, B., Chua, S., Jr., and Lowell, B.B. (2011). Leptin action on GABAergic neurons  
611 prevents obesity and reduces inhibitory tone to POMC neurons. *Neuron* *71*, 142-154.

612 Waite, M.R., Skidmore, J.M., Micucci, J.A., Shiratori, H., Hamada, H., Martin, J.F., and Martin, D.M. (2013).  
613 Pleiotropic and isoform-specific functions for Pitx2 in superior colliculus and hypothalamic neuronal  
614 development. *Molecular and cellular neurosciences* 52, 128-139.

615 Wang, L., Liu, M., Segraves, M.A., and Cang, J. (2015). Visual Experience Is Required for the Development of Eye  
616 Movement Maps in the Mouse Superior Colliculus. *The Journal of neuroscience : the official journal of the*  
617 *Society for Neuroscience* 35, 12281-12286.

618 Wang, L., McAlonan, K., Goldstein, S., Gerfen, C.R., and Krauzlis, R.J. (2020a). A Causal Role for Mouse Superior  
619 Colliculus in Visual Perceptual Decision-Making. *The Journal of neuroscience : the official journal of the Society*  
620 *for Neuroscience* 40, 3768-3782.

621 Wang, L., Sarnaik, R., Rangarajan, K., Liu, X., and Cang, J. (2010). Visual receptive field properties of neurons in the  
622 superficial superior colliculus of the mouse. *The Journal of neuroscience : the official journal of the Society for*  
623 *Neuroscience* 30, 16573-16584.

624 Wang, Q., Ding, S.-L., Li, Y., Royall, J., Feng, D., Lesnar, P., Graddis, N., Naeemi, M., Facer, B., and Ho, A. (2020b).  
625 The Allen mouse brain common coordinate framework: a 3D reference atlas. *Cell* 181, 936-953. e920.

626 Wei, P., Liu, N., Zhang, Z., Liu, X., Tang, Y., He, X., Wu, B., Zhou, Z., Liu, Y., Li, J., *et al.* (2015). Processing of visually  
627 evoked innate fear by a non-canonical thalamic pathway. *Nature communications* 6, 6756.

628 Wickersham, I.R., Finke, S., Conzelmann, K.K., and Callaway, E.M. (2007). Retrograde neuronal tracing with a  
629 deletion-mutant rabies virus. *Nature methods* 4, 47-49.

630 Wilson, J.J., Alexandre, N., Trentin, C., and Tripodi, M. (2018). Three-Dimensional Representation of Motor Space in  
631 the Mouse Superior Colliculus. *Current biology : CB* 28, 1744-1755 e1712.

632 Wolock, S.L., Lopez, R., and Klein, A.M. (2019). Scrublet: computational identification of cell doublets in single-cell  
633 transcriptomic data. *Cell systems* 8, 281-291. e289.

634 Wu, Y.E., Pan, L., Zuo, Y., Li, X., and Hong, W. (2017). Detecting Activated Cell Populations Using Single-Cell  
635 RNA-Seq. *Neuron* 96, 313-329 e316.

636 Yilmaz, M., and Meister, M. (2013). Rapid innate defensive responses of mice to looming visual stimuli. *Current*  
637 *biology : CB* 23, 2011-2015.

638 Zeisel, A., Hochgerner, H., Lonnerberg, P., Johnsson, A., Memic, F., van der Zwan, J., Haring, M., Braun, E., Borm,  
639 L.E., La Manno, G., *et al.* (2018). Molecular Architecture of the Mouse Nervous System. *Cell* 174, 999-1014  
640 e1022.

641 Zheng, G.X., Terry, J.M., Belgrader, P., Ryvkin, P., Bent, Z.W., Wilson, R., Ziraldo, S.B., Wheeler, T.D., McDermott,  
642 G.P., and Zhu, J. (2017). Massively parallel digital transcriptional profiling of single cells. *Nature*  
643 *communications* 8, 1-12.

644 Zhong, S., Ding, W., Sun, L., Lu, Y., Dong, H., Fan, X., Liu, Z., Chen, R., Zhang, S., Ma, Q., *et al.* (2020). Decoding the  
645 development of the human hippocampus. *Nature* 577, 531-536.

646 Zhong, S., Zhang, S., Fan, X., Wu, Q., Yan, L., Dong, J., Zhang, H., Li, L., Sun, L., Pan, N., *et al.* (2018). A single-cell  
647 RNA-seq survey of the developmental landscape of the human prefrontal cortex. *Nature* 555, 524-528.

648 Zhou, Z., Liu, X., Chen, S., Zhang, Z., Liu, Y., Montardy, Q., Tang, Y., Wei, P., Liu, N., Li, L., *et al.* (2019). A VTA  
649 GABAergic Neural Circuit Mediates Visually Evoked Innate Defensive Responses. *Neuron* 103, 473-488 e476.

650

651

652

## 653 **METHODS**

### 654 **Animals**

655 All experimental procedures were conducted following protocols approved by the  
656 Administrative Panel on Laboratory Animal Care at the National Institute of Biological  
657 Sciences, Beijing (NIBS) and Institute of Biophysics, Chinese Academy of Sciences. The  
658 *Pitx2-Cre* knock-in line (Liu et al., 2003) was imported from the Mutant Mouse Resource  
659 Centers (MMRRC\_000126-UCD). The vGlut2-IRES-Cre (Vong et al., 2011) was  
660 imported from the Jackson Laboratory (JAX Mice and Services). Mice were maintained  
661 on a circadian 12-h light/12-h dark cycle with food and water available ad libitum. Mice  
662 were housed in groups (3–5 animals per cage) before they were separated three days  
663 prior to virus injection. After virus injection, each mouse was housed in one cage for  
664 three weeks before subsequent experiments. To avoid potential sex-specific differences,  
665 we used male mice only.

### 666 **Nuclei preparation**

667 Mice were anesthetized with 3% isoflurane and brains were removed and placed into  
668 ice-cold oxygenated aCSF. SC were dissected from the midbrain and placed into  
669 RNAlater (Invitrogen, AM7021) and stored at 4°C overnight. To ensure the quality of the  
670 experiment, two replicates were conducted and 5 mice were used for each replicate. On  
671 the day for the experiment, tissue samples were washed with PBS (gibco, REF  
672 10010-023) and cut into pieces <1 mm and were homogenized using a glass dounce  
673 tissue grinder (Sigma, Cat #D8938) in 2 ml of ice-cold EZ PREP (Sigma, Cat #NUC-101).  
674 Then the nuclei suspension was transferred into a 15 ml tube and incubated on ice for 5  
675 minutes with 2 ml of ice-cold EZ PREP added. After incubation, the nuclei were  
676 centrifuged at 500 x g for 5 minutes at 4°C. The nuclei were re-suspended with 4 ml



677 ice-cold EZ PREP and incubated on ice for another 5 minutes. Then the nuclei were  
678 centrifuged at 500 x g for 5 minutes at 4°C and washed in 4 ml Nuclei Suspension Buffer  
679 (NBS; consisting of 1× PBS, 0.04% BSA and 0.1% RNase inhibitor (Clontech, Cat  
680 #2313A)). After being re-suspended in 2 ml NBS, the nuclei were filtered with a 35-um  
681 cell strainer (Corning, Cat #352235). The nuclei density was adjusted to 1,000,000  
682 nuclei/ ml and placed on ice for use.

### 683 **Single-nuclei RNA-sequencing library construction**

684 Libraries were prepared using 10X GENOMICS platform following the RNA library  
685 preparation protocols. Briefly, by using the 10x GemCode Technology, thousands of  
686 nuclei were partitioned into nanoliter-scale Gel BeadIn-EMulsions (GEMs). At this step,  
687 all the cDNA produced from the same nuclei were labeled by a common 10x Barcode.  
688 Primers containing an Illumina R1 sequence (read1 sequencing primer), a 16-bp 10x  
689 Barcode, a 10-bp randomer and a poly-dT primer sequence were released and mixed  
690 with nuclei lysate and Master Mix upon dissolution of the single cell 3' gel bead in a GEM.  
691 The GEMs were incubated to generate barcoded, full-length cDNA from poly-adenylated  
692 mRNA by reverse-transcription. After breaking the GEMs, silane magnetic beads were  
693 used to remove the leftover biochemical reagents and primers. Before constructing the  
694 library, the cDNA amplicon size was optimized by enzymatic fragmentation and size  
695 selection. During the end repair and adaptor ligation step, P5, P7, a sample index and  
696 R2 (read 2 primer sequence) were added to each selected cDNA. P5 and P7 primers  
697 were used in Illumina bridge amplification of the cDNA (<http://10xgenomics.com>). The  
698 libraries were sequenced using the Illumina HiSeq4000 with 150-bp paired-end reads.

### 699 **High-throughput snRNA-seq data preprocessing and analyzing**

700 For 10X snRNA-seq data, the reads were aligned to mouse reference genome mm10  
701 with Cell Ranger (v3.0.2) (Zheng et al., 2017). To detect potential doublets, we  
702 performed the scrublet (version 0.2.1) pipeline on each sample with parameters  
703 (expected\_doublet\_score=0.06, sim\_doublet\_ratio=20, min\_gene\_variability\_pctl=85

704 and `n_prin_comps=30`) (Wolock et al., 2019). 1708/17979 cells with computed doublet  
705 score greater than 0.16 were identified as doublets and excluded from subsequent  
706 analysis. Next, a series of quality control analyses were performed. Cells with `nGenes`  
707 (number of detected genes) below 800 or above 6000 were discarded; Cells with `nUMI`  
708 above 20000 or percentage of mitochondrial genes greater than 3% were removed.  
709 Genes that didn't show expression in at least 3 cells were excluded. After quality control,  
710 14892 cells and 23076 genes were kept for downstream analysis.

711 The downstream analysis of 10X snRNA-seq data was performed with R package  
712 Seurat (3.1.0) (Butler et al., 2018; Stuart et al., 2019). Briefly, A Seurat object was  
713 created with the filtered read counts. The log-transformation was then performed with the  
714 function `NormalizeData`. Next, 2000 variable genes were identified with function  
715 `FindVariableGenes` and passed to function `RunPCA` for the principal component analysis  
716 (PCA). Then, batch effect correction was performed using function `fastMNN` (Haghverdi  
717 et al., 2018) followed by dimension reduction with t-distributed stochastic neighbor  
718 embedding (t-SNE) approach using function `RunTSNE`. Subsequently, clustering  
719 analysis was performed with function `FindClusters` by setting parameter resolution to 2.0.  
720 Known markers *Slc17a6*, *Gad1*, *Mbp*, *Pdgfra*, *Aldh1a1*, *Cx3cr1*, *Cldn5*, *Foxc1* and  
721 *Ccdc146* were used to name the major cell types excitatory neurons, inhibitory neurons,  
722 oligodendrocytes, OPCs, astrocytes, microglia cells, endothelial cells, meninges and  
723 ciliated cells, respectively. In addition, we further sub-clustered excitatory neurons and  
724 inhibitory neurons into 9 and 10 subclusters, respectively, following the same procedure  
725 described above.

## 726 **Allen brain in situ data processing and layer specificity score calculation with** 727 **computational method (SPACED)**

728 To determine whether different SC neuronal subtypes own spatial layer specificity, we  
729 analyzed the in-situ hybridization images of genes that are subtype specific from Allen  
730 Mouse Brain Atlas (<https://mouse.brain-map.org/search/index>) followed the

731 computational method SPACED. Briefly, the differentially expressed genes (DEGs) of  
732 excitatory neuron and inhibitory neuron subtypes were firstly computed. To access genes  
733 whose expression pattern is more subtype restricted, we computed subtype specificity  
734 score for each gene based on Jensen-Shannon divergence, inspired by Cusanovich's  
735 study (Cusanovich et al., 2018) and ranked the DEGs by their subtype specificity score.  
736 Then, for each neuron subtype, the top10 most subtype specific genes were selected as  
737 reference for spatial classification. The in-situ slices of the selected genes used for  
738 spatial classification were downloaded from Allen Mouse Brain Atlas  
739 (<https://mouse.brain-map.org/search/index>). After that, the color type of these slices was  
740 transformed into 8-bit using ImageJ (v1.48h3). The signal pixels of each slice were  
741 converted into red by performing 'Image>Adjust>Threshold' in ImageJ. Subsequently,  
742 the four layers of the superior colliculus, named as Superficial layer (SuG), Optic layer  
743 (Op), Intermediate Gray layer/Intermediate White layer (InG/InWh) and Deep Gray layer  
744 (DpG) were selected using ROI manager. In each slice, a region with the weakest signal  
745 was selected as the background. The signal intensity of the four layers were calculated  
746 respectively. Briefly, the area fraction (definition from ImageJ: The percentage of pixels in  
747 the image or selection that have been highlighted in red using Image>Adjust>Threshold.  
748 For non-thresholded images, the percentage of non-zero pixels.) of each of the five ROIs  
749 in each slice was firstly calculated. The signal intensity was then carried out by  
750 subtracting the area fraction of the background ROI (ROI with the weakest signal) from  
751 that of the other four ROIs (SuG, Op, InG/InWh and DpG). Afterwards, the computed  
752 in-situ signal intensities of each gene for the four SC layers were normalized into range 0  
753 and 1. We then computed a log-transformation of the mean of signal intensity for each  
754 layer across the selected genes as the layer specificity score for the corresponding layer.  
755 To access the spatial distribution priority of each subtype, ANOVA analysis and post hoc  
756 test were performed on the processed signal intensities and p-value < 0.05 was  
757 considered as statistically significant. Source code for the computational method

758 SPACED is available at <https://github.com/xiaoqunwang-lab/SPACED>.

### 759 **Slice preparation and cell harvesting using patch-seq**

760 After anesthetized with 3% isoflurane, the mice were decapitated and the brains were  
761 removed and placed into ice-cold oxygenated sucrose-based artificial cerebrospinal fluid  
762 (sucrose-aCSF) containing (in mM): 234 Sucrose, 2.5 KCl, 1.25 NaH<sub>2</sub>PO<sub>4</sub>, 10 MgSO<sub>4</sub>,  
763 0.5, CaCl<sub>2</sub>, 26 NaHCO<sub>3</sub>, and 11 D-glucose, pH 7.4. Brains were cut into 200  $\mu$ m thick  
764 slices in ice-cold oxygenated sucrose-aCSF with a microtome (Leica VT 1200S). Then  
765 the slices were incubated in oxygenated artificial cerebrospinal fluid (aCSF) containing  
766 (in mM): 126 NaCl, 3 KCl, 26 NaHCO<sub>3</sub>, 1.2 NaH<sub>2</sub>PO<sub>4</sub>, 10 D-glucose, 2.4 CaCl<sub>2</sub>, and 1.3  
767 MgCl<sub>2</sub>, pH 7.4 at room temperature for 1 hour. To pick the fluorescence labeled neurons  
768 in SC, glass capillaries (2.0 mm OD, 1.16 mm ID, Sutter Instruments) were autoclaved  
769 prior to pulling patch-seq pipettes. All the surfaces of the environment were kept clean  
770 and RNase-free with DNA-OFF (Takara Cat. #9036) and RNase Zap (Life Technologies  
771 Cat. #AM9780). To ensure a successful harvest of the cell, the patch-seq pipettes were  
772 pulled by a micropipette puller (Sutter Instrument, MODEL P-97) until the resistance was  
773 2-4 M $\Omega$ . The pipette solution containing 123 mM potassium gluconate, 12 mM KCl, 10  
774 mM HEPES, 0.2 mM EGTA, 4 mM MgATP, 0.3 mM NaGTP, 10 mM sodium  
775 phosphocreatine, 20  $\mu$ g/ml glycogen, and 1 U/ $\mu$ l recombinant RNase inhibitor (Takara  
776 Cat.no. 2313A), pH ~7.25 was prepared. Cells were absorbed into patch-seq pipettes  
777 filled with pipette solution and ejected into RNase-free PCR tube containing 4ul of  
778 RNase-free lysis buffer consisting of: 0.1% Triton X-100, 5 mM (each) dNTPs, 2.5  $\mu$ M  
779 Oligo-dT30, 1 U/ $\mu$ l RNase inhibitor, and ERCC RNA Spike-In Mix (Life Technologies Cat.  
780 #4456740)(Cadwell et al., 2016a).

### 781 **Patch-seq library construction and sequencing**

782 The RNA collected from neurons by patch-seq were converted to DNA with the  
783 Smart-seq2 protocol (Picelli et al., 2014). Briefly, reverse transcription of the  
784 poly(A)-tailed mRNA with SuperScript II reverse transcriptase (Invitrogen REF

785 18064-014) was carried out. After 20 cycles of amplification, about 50 to 100 ng cDNA  
786 were produced. 25 ng cDNA was used as input DNA to construct the library with KAPA  
787 HyperPlus Kit (KAPABIOSYSTEM, KK8514). Briefly, the cDNA were fragmented with  
788 fragmentation enzymes for 20 minutes at 37 °C. Then the fragmented cDNA were  
789 proceeded to end repair and A-tailing at 65 °C for 30 minutes. After adaptor ligation step,  
790 the cDNA were amplified with 6 to 8 cycles to produce enough library DNA for  
791 sequencing. The libraries were sequenced using Illumina HiSeq 2000.

## 792 **Patch-seq data preprocessing and analyzing**

793 Adapter and low-quality reads were discarded with Python script AfterQC (Chen et al.,  
794 2017). Paired-end reads were aligned to the mouse reference genome mm10 using  
795 software STAR (STAR 2.5.3a) (Dobin et al., 2013) with default parameters except for the  
796 use of setting output type (--outSAMtype). Reads were then counted with featureCounts  
797 (featureCounts 1.5.3) (Liao et al., 2014). Cells with nGene between 200 and 10000,  
798 percentage of mitochondrial genes lower than 10% and percentage of ERCC below 5%  
799 were included. Genes that have expression in at least two cells were included. The  
800 filtered counts contained then 60 cells and 19541 genes. The downstream analysis for  
801 Smart-seq data was carried out with R package Seurat (Butler et al., 2018; Stuart et al.,  
802 2019). Gene expression normalization was performed with function NormalizeData  
803 followed by computing variable genes using function FindVariableGenes. For  
804 dimensionality reduction, principal component analysis (PCA) and t-distributed  
805 Stochastic Neighbor Embedding (t-SNE) approaches were applied with function  
806 RunPCA and RunTSNE, respectively. Clustering analysis was done with FindClusters  
807 function by setting resolution to 1.

## 808 **Mapping patch-seq data on high-throughput snRNA-seq data**

809 To mapping Smart-seq clusters onto 10x clusters, we first performed CCA alignment  
810 with Seurat functions FindIntegrationAnchors and IntegrateData (Butler et al., 2018;  
811 Stuart et al., 2019) on these two datasets to remove potential technical batch effect. We

812 then computed the correlation coefficient between Smart-seq and 10x clusters based on  
813 the CCA integrated data.

#### 814 **Identification of differentially expressed genes**

815 For 10X high-throughput snRNA data, differentially expressed genes were computed  
816 using FindAllMarkers function (Butler et al., 2018; Stuart et al., 2019) with method Wilcox.  
817 Genes with adjusted  $P_{adj} < 0.05$  were identified as differentially expressed genes (DEGs).  
818 For smart-seq data, differentially expressed genes were computed using FindAllMarkers  
819 function with method roc. Genes with a power  $> 0.4$  were identified as DEGs.

#### 820 **Tissue preparation and two-photon imaging**

821 In AAV tracing experiments, brains were harvested four weeks after viral injection,  
822 post-fixed in 4% paraformaldehyde at 4°C overnight (12-14 hours), rinsed in phosphate  
823 buffered saline for 15 min three times, and sliced into series of 120um thick coronal  
824 sections with a vibratome (Leica VT1200S, Leica). Complete tissue sections were  
825 scanned using 25X water-immersion objectives on a two-photon microscope (Nikon).  
826 Sections were imaged with 920nm excitation wavelengths. Z-series images were taken  
827 at 2um steps. Threshold parameters were individually adjusted for each case using the  
828 ImageJ (v1.53c).

#### 829 **Morphological connectivity reconstruction by image tracing of individual cells** 830 **(M-CRITIC)**

831 The dendrites and/or axons were traced using the ImageJ plug-in Simple Neurite  
832 Tracer (semiautomatic tracing) and the tracing results were saved in SWC format. Full  
833 anatomical morphology of individual neuron was reconstructed from a serial of aligned  
834 image-tracing stacks by manual works and custom written MATLAB (Mathworks, Natick,  
835 MA, R2019b) program (<https://github.com/xiaoqunwang-lab/M-CRITIC>). Subsequently,  
836 reconstructions of neuron morphology were registered to the Allen Mouse Common  
837 Coordinate Framework (CCF) (Wang et al., 2020b). Two experienced individuals  
838 performed back-to-back manual validation of the registration results.

### 839 **Generation of Cbln2-IRES-Cre mice**

840 The Cbln2-IRES-Cre mice were produced using CRISPR/Cas9 system based on the  
841 method described before (Ma et al., 2017). In brief, two sgRNA targeting sites A  
842 (Sequence: GGAGAAGAGAACAGAAGGTG) and B (Sequence:  
843 GAGCCACCAGGATGATGGGA) were used for Cbln2 targeting. All homologous  
844 recombination donor templates were prepared on the basis of the mice genomic  
845 sequence (AssemblyGRCm38.p6) by insertion of IRES-Cre sequence to the end of each  
846 targeting gene. The transcribed sgRNA and purified donor templates were mixed with  
847 Cas9 protein for mice embryo microinjection. The new born pup genomic DNA was  
848 extracted from 7-day-old mice tail based on the method described before (Ma et al.,  
849 2017). Genotyping was performed using primers listed in Table S6. The correct insertion  
850 was further confirmed by sequencing.

### 851 **AAV vectors**

852 The AAV serotype used in the present study is AAV2/9. The AAVs used in the present  
853 study are listed in Table S6. AAV-EF1 $\alpha$ -DIO-EGFP-2A-TeNT was from Thomas Südhof  
854 Lab at Stanford University. The plasmid for pAAV-EF1 $\alpha$ -DIO-ChR2-mCherry (Addgene  
855 #20297) was from Deisseroth Lab. The cDNA for AAV-EF1 $\alpha$ -DIO-jGCaMP7s was from  
856 Kim Lab (Addgene #104463). The viral particles were prepared by Taitool Inc. and  
857 BrainVTA Inc. The produced viral vector titers before dilution were in the range of  
858 0.8-1.5 $\times 10^{13}$  viral particles/ml. The final titer used for AAV injection is 5 $\times 10^{12}$  viral  
859 particles/ml.

### 860 **Stereotaxic injection**

861 Mice were anesthetized with an intraperitoneal injection of tribromoethanol (125–250  
862 mg/kg). Standard surgery was performed to expose the brain surface above the superior  
863 colliculus (SC), zona incerta (ZI), and lateral posterior thalamic nucleus (LPTN).

864 Coordinates used for SC injection were: bregma -3.80 mm, lateral  $\pm$  1.00 mm, and dura  
865 -1.25 mm. Coordinates used for ZI injection were: bregma -2.06 mm, lateral  $\pm$  1.25 mm,  
866 and dura -4.00 mm. Coordinates used for LPTN injection were: bregma -2.30 mm, lateral  
867  $\pm$  1.50 mm, and dura -2.30 mm. The injection was performed with the pipette connected  
868 to a Nano-liter Injector 201 (World Precision Instruments, Inc.) at a slow flow rate of 0.15  
869  $\mu$ l / min to avoid potential damage to local brain tissue. The pipette was withdrawn at  
870 least 20 min after viral injection. For optogenetic activation and fiber photometry  
871 experiments, AAV injections were unilateral and were followed by ipsilateral optical fiber  
872 implantation (see “Optical fiber implantation”). For TeNT-mediated synaptic inactivation  
873 experiments, AAV injections were bilateral.

#### 874 **Optical fiber implantation**

875 Thirty minutes after the AAV injection, a ceramic ferrule with an optical fiber (230  $\mu$ m  
876 in diameter, N.A. 0.37) was implanted with the fiber tip on top of the Cbln2+ SC neurons  
877 (bregma -3.80 mm, lateral +0.75 mm, and dura -1.00 mm) or Pitx2+ SC neurons  
878 (bregma -3.80 mm, lateral +1.75 mm, and dura -1.75 mm). In some cases, the optical  
879 fiber was implanted with the fiber tip on top of the ZI (bregma -2.06 mm, lateral +1.25 mm,  
880 dura -4.00 mm) or LPTN (bregma -2.30 mm, lateral +1.50 mm, dura -2.30 mm). The  
881 ferrule was then secured on the skull with dental cement. After implantation, the skin was  
882 sutured, and antibiotics were applied to the surgical wound. The optogenetic and fiber  
883 photometry experiments were conducted at least three weeks after optical fiber  
884 implantation. All experimental designs related to optical fiber implantation are  
885 summarized in Table S7. For optogenetic stimulation, the output of the laser was  
886 measured and adjusted to 5, 10, 15 and 20 mW before each experiment. The pulse  
887 onset, duration, and frequency of light stimulation were controlled by a programmable  
888 pulse generator attached to the laser system. After AAV injection and fiber implantation,  
889 the mice were housed individually for three weeks before the behavioral tests.



## 890 **Preparation of the behavioral tests**

891 Before the behavioral tests, the animals were handled daily by the experimenters for  
892 at least three days. On the day of the behavioral test, the animals were transferred to the  
893 testing room and were habituated to the room conditions for 3 h before the experiments  
894 started. The apparatus was cleaned with 20% ethanol to eliminate odor cues from other  
895 animals. All behavioral tests were conducted during the same circadian period  
896 (13:00–19:00). All behaviors were scored by the experimenters, who were blind to the  
897 animal treatments.

## 898 **Visually-evoked freezing response**

899 Visually-evoked freezing response was measured according to the established  
900 behavioral paradigm in a standard arena (35 cm × 35 cm square open field) with regular  
901 mouse bedding. A regular computer monitor was positioned above the arena for  
902 presentation of overhead moving visual target. After entering, the mice were allowed to  
903 explore the arena for 10 min. This was followed by the presentation of a small visual  
904 target moving overhead. The visual target was a black circle (2.5 cm in diameter), which  
905 was 5 deg of visual angle, moving in a linear trajectory at 10 cm/s from one corner to the  
906 other of the monitor. The luminance of the black circle and the grey background was 0.1  
907 and 3.6 cd m<sup>-2</sup>, respectively. Mouse behavior was recorded (25 fps) by two orthogonally  
908 positioned cameras with LEDs providing infrared illumination. The location of the mouse  
909 in the arena (X, Y) was measured by a custom-written Matlab program described  
910 previously (Shang et al., 2018). The instantaneous locomotion speed was calculated  
911 with a 200 ms time-bin. To quantitatively measure the freezing response, we calculated  
912 the average locomotion speed before (3 s), average speed during (5 s), and average  
913 speed after (5 s) visual stimuli.

914 For testing optogenetically-evoked freezing response, a 473-nm diode pumped solid  
915 state (DPSS) laser system was used to generate the 473-nm blue laser for light  
916 stimulation. A FC/PC adaptor was used to connect the output of the laser to the  
917 implanted ferrule for intracranial light delivery. The mice were handled daily with all  
918 optics connected for at least three consecutive days before the behavioral test to reduce  
919 stress and anxiety. Before each experiment, the output of the laser was adjusted to 5  
920 mW. The pulse onset, duration, and frequency of light stimulation were controlled by a  
921 programmable pulse generator attached to the laser system. Locomotor behaviors  
922 before, during and after light stimulation (10 Hz, 20 ms, 5 mW, 5 s) were recorded with  
923 two orthogonally positioned cameras and were measured by a custom-written Matlab  
924 program described previously (Shang et al., 2018).

### 925 **Behavioral paradigm for predatory hunting**

926 The procedure of predatory hunting experiment was described previously (Shang et  
927 al., 2019). Before the predatory hunting test, the mice went through a 9-day habituation  
928 procedure (Day H1–H9). On each of the first three habituation days (Day H1, H2, H3),  
929 three cockroaches were placed in the home-cage (with standard chow) of mice at 2:00  
930 PM. The mice readily consumed the cockroaches within 3 h after cockroach appearance.  
931 On Day H3, H5, H7, and H9, we initiated 24-h food deprivation at 7:00 PM by removing  
932 chow from the home-cage. On Day H4, H6, and H8 at 5:00 PM, we let the mice freely  
933 explore the arena (25 cm x 25 cm) for 10 min, followed by three trials of hunting practice  
934 for the cockroach. After hunting practice, we put the mice back in their home-cages and  
935 returned the chow at 7:00 PM. On the test day, we let the mice freely explore the arena  
936 for 10 min, followed by three trials of predatory hunting. After the tests, the mice were put  
937 back in their home-cage, followed by the return of chow. The cockroach was purchased  
938 from a merchant in Tao-Bao Online Stores ([www.taobao.com](http://www.taobao.com)).

939 Before the hunting practice or test, the mice were transferred to the testing room and  
940 habituated to the room conditions for 3 h before the experiments started. The arena was  
941 cleaned with 20% ethanol to eliminate odor cues from other mice. All behaviors were  
942 scored by the experimenters, who were blind to the animal treatments. Hunting  
943 behaviors were measured in an arena (25 cm × 25 cm, square open field) without regular  
944 mouse bedding. After entering, the mice explored the arena for 10 min, followed by the  
945 introduction of a cockroach. For each mouse, predatory hunting was repeated for three  
946 trials. Each trial began with the introduction of prey to the arena. The trial ended when  
947 the predator finished ingesting the captured prey. After the mice finished ingesting the  
948 prey body, debris was removed before the new trial began.

#### 949 **Measurement of predatory attack in predatory hunting**

950 In the paradigm of predatory hunting, mouse behavior was recorded in the arena with  
951 three orthogonally positioned cameras (50 frames/sec; Point Grey Research, Canada).  
952 With the video taken by the overhead camera, the instantaneous head orientation of  
953 predator relative to prey (azimuth angle) and predator-prey distance (PPD) was analyzed  
954 with the Software EthoVision XT 14 (Noldus Information Technology). With the videos  
955 taken by the two horizontal cameras, predatory attacks with jaw were visually identified  
956 by replaying the video frame by frame (50 frames/sec). We marked the predatory jaw  
957 attacks with yellow vertical lines in the behavioral ethogram of predatory hunting. With  
958 this method, we measured three parameters of predatory hunting: time to capture,  
959 latency to attack, and attack frequency. Time to capture was defined as the time  
960 between the introduction of prey and the last jaw attack. Latency to attack was defined  
961 as the time between the introduction of the prey and the first jaw attack from the predator.  
962 Attack frequency was defined as the number of jaw attacks divided by time to prey  
963 capture. Data for three trials were averaged.

#### 964 **Fiber photometry recording**

965 A fiber photometry system (ThinkerTech, Nanjing, China) was used for recording  
966 GCaMP signals from genetically identified neurons. To induce fluorescence signals, a  
967 laser beam from a laser tube (488 nm) was reflected by a dichroic mirror, focused by a  
968 10× lens (N.A. 0.3) and coupled to an optical commutator. A 2-m optical fiber (230 μm in  
969 diameter, N.A. 0.37) guided the light between the commutator and implanted optical fiber.  
970 To minimize photo bleaching, the power intensity at the fiber tip was adjusted to 0.02 mW.  
971 The GCaMP7s (Dana et al., 2019) fluorescence was band-pass filtered (MF525-39,  
972 Thorlabs) and collected by a photomultiplier tube (R3896, Hamamatsu). An amplifier  
973 (C7319, Hamamatsu) was used to convert the photomultiplier tube current output to  
974 voltage signals, which were further filtered through a low-pass filter (40 Hz cut-off;  
975 Brownlee 440). The analogue voltage signals were digitalized at 100 Hz and recorded by  
976 a Power 1401 digitizer and Spike2 software (CED, Cambridge, UK).

977 AAV-hSyn-DIO-jGCaMP7s was stereotaxically injected into the SC of *Cbln2-IRES-Cre*  
978 mice or *Pitx2-Cre* mice followed by optical fiber implantation above the *Cbln2+* SC  
979 neurons or *Pitx2+* SC neurons (see “Stereotaxic injection” and “Optical fiber  
980 implantation”). Three weeks after AAV injection, fiber photometry was used to record  
981 GCaMP signals from the *Cbln2+* SC neurons or *Pitx2+* SC neurons of head-fixed mice  
982 standing on a treadmill in response to visual and vibrissal somatosensory stimuli (see  
983 below). A flashing LED triggered by a 1-s square-wave pulse was simultaneously  
984 recorded to synchronize the video and GCaMP signals. After the experiments, the  
985 optical fiber tip sites in the SC were histologically examined in each mouse.

## 986 **Visual stimulation**

987 The test mice were head-fixed and standing on top of a cylindrical treadmill (Nanjing  
988 Thinktech Inc.) for fiber photometry recording of SC neurons in response to visual stimuli.  
989 The contralateral eye was kept open, and the ipsilateral eye was covered to prevent  
990 viewing. A 45-cm wide and 35-cm high screen was placed 18 cm from the contralateral

991 eye and 25° to the mid-sagittal plane of the mouse, resulting in a visually stimulated area  
992 (100° horizontal × 90° vertical) in the lateral visual field. The orientation of the screen was  
993 adjusted ~45° to make the screen perpendicular to the eye axis of the contralateral eye.  
994 After identification of the receptive field location on the screen of SC neurons, a  
995 computer-generated black circle (diameter= 5° or 25°) moving across the visual  
996 receptive field in eight direction at different speed (32°/s or 128°/s) was presented. The  
997 luminance of the black circle and grey background was 0.1 and 6.6 cd/m<sup>2</sup>, respectively.  
998 The black circle first appeared stationary outside the receptive field for 2 s to collect  
999 baseline calcium signals as controls, and was then presented with an interval of at least  
1000 15 s between trials to allow the neurons to recover from any motion adaptation.

#### 1001 **Vibrissal air-puff stimulation**

1002 To mimic the somatosensory cues of moving prey, brief air-puffs (50 ms) with different  
1003 strengths (15 psi or 30 psi) were delivered through a metal tube (diameter 1.5 mm)  
1004 connected with Picospritzer III. The output of Picospritzer III was controlled by a  
1005 programmable pulse generator. When delivering air-puffs as vibrissal somatosensory  
1006 stimuli, the tube was oriented from temporal to nasal side of mouse. The distance  
1007 between the tube nozzle and the whiskers were ~30 mm. When presenting repetitive  
1008 air-puff stimuli, the frequency was either 0.5 Hz or 2 Hz. For each mouse, 10-15 trials  
1009 were repeatedly presented to the whiskers, so that an average response was obtained.

#### 1010 **Cell-type-specific anterograde tracing**

1011 For cell-type-specific anterograde tracing of Cbln2<sup>+</sup> and Pitx2<sup>+</sup> SC neurons,  
1012 AAV-DIO-EGFP (200 nano litter) was stereotaxically injected into the SC of  
1013 Cbln2-IRES-Cre and Pitx2-Cre mice, respectively. The mice were then maintained in a  
1014 cage individually. Three weeks after viral injection, mice were perfused with saline  
1015 followed by 4% paraformaldehyde (PFA) in PBS. After 8 h of post-fixation in 4% PFA,

1016 coronal or sagittal brain sections at 40  $\mu\text{m}$  in thickness were prepared using a cryostat  
1017 (Leica CM1900). All coronal sections were collected and stained with primary antibody  
1018 against EGFP and DAPI. The coronal brain sections were imaged with an Olympus  
1019 VS120 epifluorescence microscope (10 $\times$  objective lens).

## 1020 **Cell-type-specific RV tracing**

1021 The modified rabies virus based three-virus system was used for mapping the  
1022 whole-brain inputs to vGAT+ AHN neurons (Wickersham et al., 2007). All the viruses  
1023 included AAV2/9-CAG-DIO-EGFP-2A-TVA ( $5 \times 10^{12}$  viral particles/ml),  
1024 AAV2/9-CAG-DIO-RG ( $5 \times 10^{12}$  viral particles/ml), and EnvA-pseudotyped, glycoprotein  
1025 (RG)-deleted and DsRed-expressing rabies virus (RV-EvnA-DsRed, RV) ( $5.0 \times 10^8$  viral  
1026 particles/ml), which were packaged and provided by BrainVTA Inc. (Wuhan, China). A  
1027 mixture of AAV2/9-CAG-DIO-EGFP-2A-TVA and AAV2/9-CAG-DIO-RG (1:1, 200 nl)  
1028 was stereotaxically injected into the SC of Cbln2-IRES-Cre or Pitx2-Cre mice unilaterally.  
1029 Two weeks after AAV helper injection, RV-EvnA-DsRed (300 nl) was injected into the  
1030 same location in the SC of Cbln2-IRES-Cre or Pitx2-Cre mice in a biosafety level-2 lab  
1031 facility. Starter neurons were characterized by the coexpression of DsRed and EGFP,  
1032 which were restricted in the SC.

1033 One week after injection of rabies virus, mice were perfused with saline followed by  
1034 4% paraformaldehyde (PFA) in PBS. After 8 h of post-fixation in 4% PFA, coronal brain  
1035 sections at 40  $\mu\text{m}$  in thickness were prepared using a cryostat (Leica CM1950). All  
1036 coronal sections were collected and stained with DAPI. The coronal brain sections were  
1037 imaged with an Olympus VS120 epifluorescence microscope (10 $\times$  objective lens) and  
1038 analyzed with ImageJ. For quantifications of subregions, boundaries were based on the  
1039 Allen Institute's reference atlas. We selectively analyzed the retrogradely labeled dense  
1040 areas. The factional distribution of total cells labeled by rabies virus was measured.

## 1041 **Cell-counting strategies**

1042 Cell-counting strategies are summarized in Table S8. For counting cells in the SC, we  
1043 collected coronal sections (40  $\mu\text{m}$ ) from bregma -3.08 mm to bregma -4.60 mm for each  
1044 mouse. We acquired confocal images (20x objective, Zeiss LSM 780) followed by cell  
1045 counting with ImageJ software. By combining fluorescent in situ hybridization and  
1046 immunohistochemistry, we counted the number of Cbln2+ and Pitx2+ cells in the SC and  
1047 calculated the percentages of Cbln2+ and Pitx2+ neurons in the neuronal population  
1048 labeled by EGFP. To analyze monosynaptic inputs of Cbln2+ SC neurons, we counted  
1049 DsRed+ cells in a series of brain areas. For the detailed information on the brain regions  
1050 and cell counting strategy, see Table S8. We acquired fluorescent images (10x objective,  
1051 Olympus) followed by cell counting with ImageJ software.

### 1052 **Slice physiological recording**

1053 Slice physiological recording was performed according to the published work (Liu et al.,  
1054 2017). Brain slices containing the SC were prepared from adult mice anesthetized with  
1055 Isoflurane before decapitation. Brains were rapidly removed and placed in ice-cold  
1056 oxygenated (95% O<sub>2</sub> and 5% CO<sub>2</sub>) cutting solution (228 mM sucrose, 11 mM glucose, 26  
1057 mM NaHCO<sub>3</sub>, 1 mM NaH<sub>2</sub>PO<sub>4</sub>, 2.5 mM KCl, 7 mM MgSO<sub>4</sub>, and 0.5 mM CaCl<sub>2</sub>). Coronal  
1058 brain slices (400  $\mu\text{m}$ ) were cut using a vibratome (VT 1200S, Leica Microsystems). The  
1059 slices were incubated at 28°C in oxygenated artificial cerebrospinal fluid (ACSF: 119 mM  
1060 NaCl, 2.5 mM KCl, 1 mM NaH<sub>2</sub>PO<sub>4</sub>, 1.3 mM MgSO<sub>4</sub>, 26 mM NaHCO<sub>3</sub>, 10 mM glucose,  
1061 and 2.5 mM CaCl<sub>2</sub>) for 30 min, and were then kept at room temperature under the same  
1062 conditions for 1 h before transfer to the recording chamber at room temperature. The  
1063 ACSF was perfused at 1 ml/min. The acute brain slices were visualized with a 40 $\times$   
1064 Olympus water immersion lens, differential interference contrast (DIC) optics (Olympus  
1065 Inc., Japan), and a CCD camera.

1066 Patch pipettes were pulled from borosilicate glass capillary tubes (Cat #64-0793,  
1067 Warner Instruments, Hamden, CT, USA) using a PC-10 pipette puller (Narishige Inc.,

1068 Tokyo, Japan). For recording of action potentials (current clamp), pipettes were filled  
1069 with solution (in mM: 135 K-methanesulfonate, 10 HEPES, 1 EGTA, 1 Na-GTP, 4  
1070 Mg-ATP, and 2% neurobiotin, pH 7.4). The resistance of pipettes varied between  
1071 3.0–3.5 M $\Omega$ . The voltage signals were recorded with MultiClamp 700B and Clampex 10  
1072 data acquisition software (Molecular Devices). After establishment of the whole-cell  
1073 configuration and equilibration of the intracellular pipette solution with the cytoplasm,  
1074 series resistance was compensated to 10–15 M $\Omega$ . Recordings with series resistances  
1075 of > 15 M $\Omega$  were rejected. An optical fiber (200  $\mu$ m in diameter) was used to deliver light  
1076 pulses, with the fiber tip positioned 500  $\mu$ m above the brain slices. Laser power was  
1077 adjusted to 5 mW. Light-evoked action potentials from ChR2-mCherry<sup>+</sup> neurons in the  
1078 SC were triggered by a light-pulse train (473 nm, 2 ms, 10 Hz or 20 Hz, 20 mW)  
1079 synchronized with Clampex 10 data acquisition software (Molecular Devices).

#### 1080 **RNA in situ hybridization**

1081 Mice were perfused with PBS treated with 0.1% DEPC (Sigma, D5758), followed by  
1082 DEPC-treated PBS containing 4% PFA (PBS-PFA). Brains were post-fixed in  
1083 DEPC-treated PBS-PFA solution overnight and then placed in DEPC-treated 30%  
1084 sucrose solution at 4C° for 30h. Brain sections to a thickness of 30  $\mu$ m were prepared  
1085 using a cryostat (Leica, CM3050S) and collected in DEPC-treated PBS. Fluorescence in  
1086 situ hybridization (FISH) was performed as previously described (Chen et al., 2020) with  
1087 minor modifications. Briefly, brain sections were rinsed with DEPC-treated PBS,  
1088 permeabilized with DEPC-treated 0.1% Tween 20 solution (in PBS) and DEPC-treated 2  
1089  $\times$  SSC containing 0.5% Triton. Brain sections were then treated with H<sub>2</sub>O<sub>2</sub> solution and  
1090 acetic anhydride solution to reduce nonspecific FISH signals. After 2h incubation in  
1091 prehybridization buffer (50% formamide, 5  $\times$  SSC, 0.1% Tween20, 0.1% CHAPS, 5mM  
1092 EDTA in DEPC-treated water) at 65°C, brain sections were then hybridized with the  
1093 hybridization solution containing mouse anti-sense cRNA probes (digoxigenin labeling)



1094 for Cbln2 (primers CAGCTTCCACGTGGTCAA and AGCCCCCAGCATGAAAAC) or  
1095 Pitx2 (primers CTCTCAGAGTATGTTTTCCCG and  
1096 AGGATGGGTCGTACATAGCAGT) at 65°C for 20h. The sequences of cDNA primers for  
1097 cRNA probes were the same as those in the ISH DATA of the Allen brain atlas  
1098 (<https://mouse.brain-map.org/>). After washing, brain sections were incubated with  
1099 Anti-Digoxigenin-POD, Fab fragments (1:400, Roche, 11207733910) at 4°C for 30 h,  
1100 and FISH signals were detected using a TSA Plus Cyanine 3 kit (NEL744001KT,  
1101 PerkinElmer). To visualize the GFP signals, brain sections were incubated with a  
1102 primary antibody against GFP (1:2000, ab290, Abcam) at 4°C for 24 h and then with an  
1103 Alexa Fluor® 488-conjugated goat anti-rabbit secondary antibody (1:500, A11034,  
1104 Invitrogen) at room temperature for 2h. Brain sections were mounted and imaged using a  
1105 Zeiss LSM780 confocal microscope or the Olympus VS120 Slide Scanning System.

## 1106 **Immunohistochemistry**

1107 Mice were anesthetized with isoflurane and sequentially perfused with saline and  
1108 phosphate buffered saline (PBS) containing 4% paraformaldehyde (PFA). Brains were  
1109 removed and incubated in PBS containing 30% sucrose until they sank to the bottom.  
1110 Post-fixation of the brain was avoided to optimize immunohistochemistry. Cryostat  
1111 sections (40 µm) were collected, incubated overnight with blocking solution (PBS  
1112 containing 10% goat serum and 0.7% Triton X-100), and then treated with primary  
1113 antibodies diluted with blocking solution for 3–4 h at room temperature. Primary  
1114 antibodies used for immunohistochemistry are displayed in Table S6. Primary antibodies  
1115 were washed three times with washing buffer (PBS containing 0.7% Triton X-100) before  
1116 incubation with secondary antibodies (tagged with Cy2, Cy3, or Cy5; dilution 1:500; Life  
1117 Technologies Inc., USA) for 1 h at room temperature. Sections were then washed three  
1118 times with washing buffer, stained with DAPI, and washed with PBS, transferred onto  
1119 Super Frost slides, and mounted under glass coverslips with mounting media.

1120 Sections were imaged with an Olympus VS120 epifluorescence microscope (10×  
1121 objective lens) or a Zeiss LSM 710 confocal microscope (20× and 60× oil-immersion  
1122 objective lens). Samples were excited by 488, 543, or 633 nm lasers in sequential  
1123 acquisition mode to avoid signal leakage. Saturation was avoided by monitoring pixel  
1124 intensity with Hi-Lo mode. Confocal images were analyzed with ImageJ software.

### 1125 **Data quantification and statistical analyses**

1126 All experiments were performed with anonymized samples in which the experimenter  
1127 was unaware of the experimental conditions of the mice. For the statistical analyses of  
1128 experimental data, Student t-test and One-Way ANOVA were used. The “n” used for  
1129 these analyses represents number of mice or cells. See the detailed information of  
1130 statistical analyses in figure legend and in Table S9. All statistical comparisons were  
1131 conducted on data originating from three or more biologically independent experimental  
1132 replicates. All data are shown as means  $\pm$  SEM.

### 1133 **Data availability**

1134 The scRNA-seq data used in this study have been deposited in the Gene Expression  
1135 Omnibus (GEO) under accession numbers GSE162404. The data that support the  
1136 findings of this study are available from the corresponding author upon reasonable  
1137 request.

1138

1139

1140 **FIGURE LEGENDS**

1141 **Figure 1 Identification and characterization of cell types and spatial heterogeneity**  
1142 **of mouse superior colliculus neurons**

1143 **(A)** Unbiased clustering of snRNA-seq data of mouse SC cells. Each dot represents an  
1144 individual cell. The cells were grouped into 26 clusters, and the cell types were  
1145 annotated according to the expression of known marker genes. **(B)** t-SNE showing the  
1146 known markers of major cell types (excitatory neurons, inhibitory neurons,  
1147 oligodendrocytes, OPCs, astrocytes, microglia, endothelial cells and meningeal cells) in  
1148 the mouse SC. The scale bar indicates the relative gene expression level. (gray, low; red,  
1149 high). **(C, D)** Dot plots showing the differentially expressed genes among 9 excitatory  
1150 neuron subclusters (C) and 10 inhibitory neuron subclusters (D). **(E, F)** Spatial  
1151 expression of the top DEGs of excitatory neuron subclusters (E) and inhibitory neuron  
1152 subclusters (F). Upper panel: gene expression levels projected onto the two-dimensional  
1153 t-SNE and colored according to relative gene expression level (gray, low; red, high). Red  
1154 dashed line, excitatory neuron subclusters; blue dashed line, inhibitory neuron  
1155 subclusters. Lower panel: In situ hybridization staining of mouse superior colliculus for  
1156 the identified excitatory neuron layer markers (from the Allen Brain Atlas). **(G)** Heatmap  
1157 showing the computed layer specificity score for each excitatory neuron subcluster (left)  
1158 and each inhibitory neuron subcluster (right). Statistical analyses were performed by  
1159 ANOVA (\*  $P < 0.05$ ). **(H)** SC layer information annotation of neurons. Upper panel: cells  
1160 colored by layer information as indicated by the legend on the bottom. Lower panel: gene  
1161 ontology enrichment analysis of layer-annotated SC neurons.

1162

1163 **Figure 2 Projection-based analyses of single-cell gene expression profiles**  
1164 **(A)** Schematic diagram showing injection of AAV mixture into the SC of vGlut2-IRES-Cre  
1165 mice for sparse labeling of glutamatergic SC neuron projections. **(B)** Two reconstructed  
1166 neurons (blue, cells projected from the Op to the LPTN; brown, cells projected from the  
1167 InG to the ZI) were registered to the mouse brain regions (Op, magenta; LPTN, orange;  
1168 InG/InWh, green; ZI, cyan). **(C)** Coronal, sagittal and horizontal views of reconstructed  
1169 neurons. Scale bar, 1 mm. **(D)** Schematic diagram showing injection of  
1170 AAV2-retro-DIO-EGFP into the LPTN of vGlut2-IRES-Cre mice for labeling of  
1171 LPTN-projecting glutamatergic SC neurons. **(E)** Sample micrograph showing the  
1172 distribution of LPTN-projecting glutamatergic SC neurons labeled by EGFP. **(F)**  
1173 Schematic diagram showing injection of AAV2-retro-DIO-EGFP into the ZI of  
1174 vGlut2-IRES-Cre mice for labeling of ZI-projecting glutamatergic SC neurons. **(G)**  
1175 Sample micrograph showing the distribution of ZI-projecting glutamatergic SC neurons  
1176 labeled by EGFP. **(H)** Three-dimensional t-SNE plot showing SC cells sequenced by  
1177 patch-seq. The cells are colored according to their cell projection identities (OP-LPTN,  
1178 blue; InG-ZI, red). **(I)** Heatmap showing the differentially expressed genes of ZI- and  
1179 LPTN-projecting SC neurons. The scale bar indicates the relative gene expression level.  
1180 **(J)** Expression of genes enriched in LPTN-projecting and ZI-projecting neurons  
1181 visualized as a t-SNE plot (blue, low; yellow, high). **(K)** Transcriptional correlation  
1182 between LPTN-projecting and ZI-projecting neurons (patch-seq) and excitatory neuron  
1183 subtypes (high-throughput snRNA-seq). The scale bar indicates the correlation  
1184 coefficient (blue, low; yellow, high). **(L, M)** Volcano plot showing the differentially  
1185 expressed genes in excitatory neuron subtypes Ex-3 and Ex-6 (L) and excitatory neuron  
1186 subtypes Ex-1 and Ex-4 (M). Each dot represents a gene. Significantly upregulated  
1187 genes are shown in green. **(N)** t-SNE plot visualizing the expression of differentially  
1188 expressed genes in LPTN-projecting (top) and ZI-projecting (bottom) neurons in the  
1189 same layout used in Figure 1A. The scale bar indicates the relative gene expression

1190 level (gray, low; red, high).

1191

1192 **Figure 3 Synaptic inactivation of Cbln2+ and Pitx2+ SC neurons**

1193 **(A)** Sample coronal section showing the restricted distribution of EGFP-expressing  
1194 neurons in the Op layer of the SC in Cbln2-IRES-Cre mice. **(B)** Sample micrographs  
1195 showing the specificity and efficiency of the Cbln2-IRES-Cre line for labeling of SC  
1196 neurons expressing Cbln2 mRNA. **(C)** Schematic diagram showing the behavioral  
1197 paradigm of the visually evoked freezing response in mice. **(D)** Time courses of  
1198 locomotion speed before, during and after the sweep of an overhead moving visual  
1199 target in mice without (Ctrl) or with (TeNT) synaptic inactivation of Cbln2+ SC neurons.  
1200 **(E-G)** Quantitative analysis of locomotion speed before (E), during (F) and after (G) the  
1201 sweep of an overhead moving target in mice without (Ctrl) and with (TeNT) synaptic  
1202 inactivation of Cbln2+ SC neurons. **(H)** Sample coronal section showing the restricted  
1203 distribution of EGFP-expressing neurons in the In layer of the SC in Pitx2-Cre mice. **(I)**  
1204 Sample micrographs showing the specificity and efficiency of the Pitx2-Cre line for  
1205 labeling of SC neurons expressing Pitx2 mRNA. **(J)** Schematic diagram showing the  
1206 behavioral paradigm of predatory hunting in mice. **(K)** Behavioral ethograms of predatory  
1207 hunting in mice without (Ctrl) and with (TeNT) synaptic inactivation of Pitx2+ SC neurons.  
1208 The yellow vertical lines indicate jaw attacks. The PPD curve shows the time course of  
1209 prey-predator distance. **(L-N)** Quantitative analysis of latency to attack (L), time to  
1210 capture (M) and attack frequency (N) in mice without (Ctrl) and with (TeNT) synaptic  
1211 inactivation of SC Pitx2+ neurons. The data in (D-G, L-N) are presented as mean  $\pm$  SEM  
1212 (error bars). The statistical analyses in (E-G, L-N) were performed using Student's t-test  
1213 (n.s.  $P > 0.1$ ; \*\*\*  $P < 0.001$ ). For the P values, see Table S9. Scale bars are indicated in  
1214 the graphs.

1215

1216 **Figure 4 Sensory responses of Cbln2+ and Pitx2+ SC neurons**

1217 **(A, B)** Sample micrographs showing the optical fiber tracks above GCaMP7-positive SC  
1218 neurons in Cbln2-IRES-Cre (A) and Pitx2-Cre (B) mice. **(C)** Schematic diagram of the  
1219 experimental configuration showing vibrissal tactile stimulation (air-puff) and visual  
1220 stimulation; the latter was presented as a black circle moving across the receptive field  
1221 (R.F.) on a tangent screen. **(D)** Normalized GCaMP fluorescence changes ( $\Delta F/F$ ) of  
1222 Cbln2+ SC neurons in response to a stimulus consisting of a black circle ( $5^\circ$ ) moving at  
1223  $32^\circ/s$  in various directions (T-to-N, N-to-T, V-to-D, D-to-V). N, D, T and V indicate nasal,  
1224 dorsal, temporal and ventral, respectively. **(E)** Normalized GCaMP fluorescence  
1225 changes ( $\Delta F/F$ ) of Cbln2+ SC neurons in response to a black circle ( $5^\circ$ ) moving (T-to-N)  
1226 at different velocities ( $32^\circ/s$  and  $128^\circ/s$ ). **(F)** Normalized GCaMP fluorescence changes  
1227 ( $\Delta F/F$ ) of Cbln2+ SC neurons in response to black circles of different sizes ( $5^\circ$  and  $25^\circ$ )  
1228 moving in a T-to-N direction at  $32^\circ/s$ . **(G)** Normalized GCaMP fluorescence changes  
1229 ( $\Delta F/F$ ) of Pitx2+ SC neurons in response to air puffs of different strengths (0, 10, 20, and  
1230 40 p.s.i.) directed toward the contralateral or ipsilateral vibrissal area. **(H)** Quantitative  
1231 analysis of peak GCaMP responses of Cbln2+ SC neurons to black circles moving in  
1232 eight directions. Inset, eight directions spaced by  $45^\circ$ . **(I)** Quantitative analysis of the  
1233 peak GCaMP responses of Cbln2+ SC neurons to black circles moving at different  
1234 velocities. **(J)** Quantitative analysis of the peak GCaMP responses of Cbln2+ SC  
1235 neurons to moving black circles with different diameters. **(K)** Quantitative analysis of the  
1236 peak GCaMP responses of Pitx2+ SC neurons to air puffs of different strengths directed  
1237 toward the contralateral or ipsilateral vibrissal areas. The data in (D-K) are presented as  
1238 mean  $\pm$  SEM (error bars). The statistical analyses in (K) were performed by one-way  
1239 ANOVA (\*\*\*)  $P < 0.001$ ). For the P values, see Table S9. Scale bars are indicated in the  
1240 graphs.

1241

1242 **Figure 5 Retrograde tracing of Cbln2+ and Pitx2+ SC neurons using rabies virus**  
1243 **(A)** Series of schematic diagrams showing the strategy for monosynaptic retrograde  
1244 tracing of Cbln2+ and Pitx2+ SC neurons using a combination of AAV and rabies virus  
1245 (RV). Left, AAV helpers and RV used for injection. Middle, injection into the SC of  
1246 Cbln2-IRES-Cre and Pitx2-Cre mice. Right, timing of AAV and RV injections. **(B, C)**  
1247 Sample micrographs showing the expression of EGFP (green) and DsRed (red) in  
1248 Cbln2+ and Pitx2+ neurons in the SC of Cbln2-IRES-Cre (B) and Pitx2-Cre mice (C).  
1249 The dually labeled cells indicate starter cells. For single-channel images, see Figure S8.  
1250 **(D-G)** Sample micrographs showing DsRed+ cells in various brain regions, including the  
1251 contralateral and ipsilateral retina (D), the primary visual cortex (V1) (E), the contralateral  
1252 principal trigeminal nucleus (Pr5) (F), and the ipsilateral primary somatosensory cortex  
1253 (S1) (G), of Cbln2-IRES-Cre and Pitx2-Cre mice. **(H)** Fractional distribution of total  
1254 DsRed-labeled cells in various brain regions that monosynaptically project to Cbln2+ and  
1255 Pitx2+ SC neurons. The scale bars are labeled in the graphs. The number of mice (H) is  
1256 indicated in each graph. The data in (H) are presented as mean  $\pm$  SEM. The statistical  
1257 analyses in (H) were performed using Student's t-test (\*\*\*)  $P < 0.001$ ). For the P values,  
1258 see Table S9.



1259 **Figure 6 Anterograde tracing of Cbln2+ and Pitx2+ SC neurons**

1260 **(A, B)** Sample micrograph (left) and quantitative analysis (right) showing the distribution  
1261 of EGFP-expressing neurons in the SC of Cbln2-IRES-Cre (A) and Pitx2-Cre mice (B).  
1262 **(C)** Sample micrographs showing the distribution of EGFP-positive axons in the LPLR  
1263 and LPMR (collectively the LPTN) of Cbln2-IRES-Cre (left) and Pitx2-Cre (right) mice. **(D)**  
1264 Quantitative analysis of fluorescence signals from EGFP+ axons in the LPTN of  
1265 Cbln2-IRES-Cre and Pitx2-Cre mice. **(E)** Sample micrographs showing the distribution of  
1266 EGFP-positive axons in the ZI of Cbln2-IRES-Cre (left) and Pitx2-IRES-Cre (right) mice.  
1267 **(F)** Quantitative analysis of fluorescence signals from EGFP+ axons in the ZI of  
1268 Cbln2-IRES-Cre and Pitx2-Cre mice. **(G)** Schematic diagram showing the viral injection  
1269 strategy used to label LPTN-projecting Cbln2+ SC neurons. **(H)** Coronal section from a  
1270 Cbln2-IRES-Cre mouse showing the distribution of Cbln2+ SC neurons labeled by  
1271 AAV2-retro-DIO-EGFP and AAV-DIO-mCherry. **(I)** Sample micrograph (left) and  
1272 quantitative analysis (right) showing the number of LPTN-projecting Cbln2+ SC neurons  
1273 (EGFP+) relative to total Cbln2+ SC neurons (mCherry+). **(J)** Schematic diagram  
1274 showing the viral injection strategy used to label ZI-projecting Pitx2+ SC neurons. **(K)**  
1275 Coronal section from a Pitx2-Cre mouse showing the distribution of Pitx2+ SC neurons  
1276 labeled by AAV2-retro-DIO-EGFP and AAV-DIO-mCherry. **(L)** Sample micrograph (left)  
1277 and quantitative analysis (right) showing the number of ZI-projecting Pitx2+ SC neurons  
1278 (EGFP+) relative to total Pitx2+ SC neurons (mCherry+). The data in A, B, D, F, I, and L  
1279 are presented as mean  $\pm$  SEM (error bars). The statistical analyses in D and F were  
1280 performed using Student's t-test (\*\*\*)  $P < 0.001$ ). For the P values, see Table S9. Scale  
1281 bars are indicated in the graphs.

1282

1283 **Figure 7 Activation of the Cbln2+ SC-LPTN and Pitx2+ SC-ZI pathways**  
1284 **(A)** Sample micrographs showing the expression of ChR2-mCherry in the Cbln2+ SC  
1285 neurons of Cbln2-IRES-Cre mice (left) and the optical fiber track above the  
1286 ChR2-mCherry+ axons in the LPTN (right). **(B)** Schematic diagram showing the  
1287 behavioral paradigm for the light-evoked freezing response in an arena. **(C)** Time  
1288 courses of the locomotion speed of mice before, during and after light stimulation (10 Hz,  
1289 20 ms, 5 mW, 5 s) of the Cbln2+ SC-LPTN pathway expressing ChR2-mCherry (ChR2)  
1290 or mCherry (Ctrl). **(D)** Quantitative analysis of the locomotion speed of mice before,  
1291 during and after light stimulation of the Cbln2+ SC-LPTN pathway expressing  
1292 ChR2-mCherry (ChR2) or mCherry (Ctrl). **(E)** Sample micrographs showing the  
1293 expression of ChR2-mCherry in the Pitx2+ SC neurons of Pitx2-Cre mice (left) and the  
1294 optical fiber track above the ChR2-mCherry+ axons in the ZI (right). **(F)** Schematic  
1295 diagram showing the behavioral paradigm for prey capture paired with light stimulation of  
1296 the Pitx2+ SC-ZI pathway. **(G)** Behavioral ethograms of predatory hunting in mice  
1297 without (Laser OFF) and with (Laser ON) light stimulation of the Pitx2+ SC-ZI pathway.  
1298 **(H-J)** Quantitative analyses of latency to attack (H), time to capture (I) and attack  
1299 frequency (J) in mice without (OFF) and with (ON) light stimulation of the Pitx2+ SC-ZI  
1300 pathway. **(K)** Schematic diagram showing a mouse encountering a cruising aerial  
1301 predator or a terrestrial prey in the natural environment. **(L)** Yin-Yang circuit modules  
1302 formed by Cbln2+ and Pitx2+ SC neurons and their downstream target areas. The  
1303 Cbln2+ SC neurons in the “Yin” module detect the sensory features of cruising aerial  
1304 predators and initiate freezing as a defensive response for the avoidance of predators  
1305 through the Cbln2+ SC-LPTN pathway. The Pitx2+ SC neurons in the Yang module  
1306 mediate tactile-triggered prey capture behavior through the Pitx2+ SC-ZI pathway. The  
1307 data in (C, D, H-J) are presented as mean  $\pm$  SEM (error bars). The statistical analyses in  
1308 (D, H-J) were performed using Student’s t-test (n.s.  $P > 0.1$ ; \*  $P < 0.05$ ; \*\*  $P < 0.01$ ;  
1309 \*\*\* $P < 0.001$ ). For the P values, see Table S9. Scale bars are indicated in the graphs.  
1310

1311 **Figure S1 Quality of snRNA-seq metrics and the spatial distribution of neurons**  
1312 **(A)** Number of genes (nGene) and number of unique molecular identifiers (nUMI) of the  
1313 two snRNA-seq experiment replicates presented in violin plot. Replicate 1 (sample-1) is  
1314 colored in yellow and replicate 2 (sample-2) is colored in blue. Each dot represents an  
1315 individual cell.  
1316 **(B)** t-SNE plot of the two replicates of single-cell RNA-seq experiment. Replicate 1  
1317 (sample-1) is colored in yellow and replicate 2 (sample-2) is colored in blue. Each dot  
1318 represents an individual cell.  
1319 **(C)** Heatmap of top50 differentially expressed genes (DEGs) of each major cell type  
1320 shown in Figure 1A. The scale bar indicates relative gene expression level (purple, low;  
1321 yellow, high).  
1322 **(D)** Spatial expression of the top DEGs of excitatory neuron subclusters and inhibitory  
1323 neuron subclusters. Upper panel: gene expression levels projected onto the  
1324 two-dimensional t-SNE and colored according to relative gene expression level (gray,  
1325 low; red, high). Red dashed line, excitatory neuron subclusters; blue dashed line,  
1326 inhibitory neuron subclusters. Lower panel: In situ hybridization staining of mouse  
1327 superior colliculus for the identified excitatory neuron layer markers (from the Allen Brain  
1328 Atlas).  
1329

1330 **Figure S2 Electrophysiological properties and the expression of DEGs between**  
1331 **LPTN- and ZI- projecting SC neurons**

1332 **(A)** Schematic diagram showing current-clamp whole-cell recording from LPTN- or  
1333 ZI-projecting SC neurons labeled with EGFP.

1334 **(B, C)** Quantitative analyses of resting membrane potential (B) and firing threshold (C) of  
1335 SC neurons that project to the LPTN (LPTN) and ZI (ZI).

1336 **(D)** Example traces of action potential firing evoked by depolarizing currents injected into  
1337 EGFP+ LPTN-projecting and ZI-projecting SC neurons.

1338 **(E)** Quantitative analyses of spike number as a function of current intensity. Scale bar is  
1339 indicated in the graph.

1340 **(F)** Patch-seq strategy of LPTN-projecting neurons from OP and ZI-projecting neurons  
1341 from InG in SC. A representative example was given to show how the fluorescence  
1342 labeled cells were picked (bottom).

1343 **(G)** Violin plots showing the quality control metrics of the scRNA-seq experiments by  
1344 Patch-seq. Each dot represents an individual cell. Red represents ZI-projecting neurons  
1345 from the InG layer in SC. Blue represents LPTN-projecting neurons from the OP layer in  
1346 SC.

1347 **(H)** In situ hybridization visualization (from Allen Brain Atlas) of genes presented in  
1348 Figure 2 J.

1349 **(I)** Examples of gene expression pattern and in situ hybridization visualization (from Allen  
1350 Brain Atlas) of the DEGs presented in Figure 2I. The scale bar indicates relative gene  
1351 expression level (blue, low; yellow, high).

1352 **(J)** t-SNE plot visualizing the expression of differentially expressed genes between  
1353 LPTN-projecting (upper panel) or ZI-projecting (lower panel) neurons by same layout as  
1354 Figure 1A. The scale bar indicates the relative gene expression level. (gray, low; red,  
1355 high). Red dash line: Op layer excitatory neuron subclusters.; blue dash line: InG layer  
1356 excitatory neuron subclusters. Data in (B, C, E) are mean  $\pm$  SEM. Statistical analyses in  
1357 (B, C) were performed with Student t-test (n.s.,  $P > 0.1$ ). Statistical analysis in (E) was

1358 performed with One-Way ANOVA (n.s.,  $P > 0.1$ ). For P values, see Table S9.

1359

1360

1361 **Figure S3 Generation of Cbln2-IRES-Cre mice to test the function of Cbln2+ and**  
1362 **Pitx2+ SC neurons**

1363 **(A)** Heatmap showing the computed layer specificity score of ten DEGs of  
1364 LPTN-projecting and ZI-projecting neurons.

1365 **(B)** Schematic diagram of CRISPR/Cas9-mediated knock-in of a Cre coding cassette  
1366 into downstream of Cbln2 gene of mice. The Cre expression was driven by IRES.

1367 **(C)** Top, PCR amplification of Cre cassette knock-in at the endogenous Cbln2 gene locus.  
1368 Arrows indicate PCR amplification of the genome joint with the left homologous arm (Up,  
1369 2713 bp) or the right homologous arm (Down, 1617 bp), and part of the Cre report  
1370 cassette. The primers used for PCR amplification are indicated in (B) and shown in Table  
1371 S6. PCR amplicons were cloned and sequenced for insertion analysis. Samples #2, #3,  
1372 #6, #7 and #11 showed correct recombination. The insertion information was furthered  
1373 confirmed by Sanger sequencing. M indicates marker DL2000 (Takara). Bottom, the  
1374 chromatographs from the sequence files showed that CRISPR/Cas9-mediated precise  
1375 insertion at the target locus.

1376 **(D)** Example micrographs showing, in Cbln2-IRES-Cre mice, the Cbln2+ SC neurons  
1377 labeled by EGFP were predominantly positive for vGlut2 mRNA (first row), while they  
1378 were mostly negative for vGat mRNA (second row).

1379 **(E)** Example coronal section of Cbln2-IRES-Cre mice showing expression of EGFP and  
1380 TeNT in Cbln2+ SC neurons that were predominantly distributed in the SC Op layer.

1381 **(F)** Behavioral ethograms of predatory hunting in example mice without (Ctrl) and with  
1382 (TeNT) inactivation of Cbln2+ SC neurons.

1383 **(G-I)** Quantitative analyses of latency to attack (G), time to capture (H), and attack  
1384 frequency (I) of Cbln2-IRES-Cre mice without (Ctrl) and with (TeNT) inactivation of  
1385 Cbln2+ SC neurons.

1386 **(J)** Example micrographs showing, in Pitx2-Cre mice, the Pitx2+ SC neurons labeled by  
1387 EGFP were predominantly positive for vGlut2 mRNA (first row), while they were mostly

1388 negative for vGat mRNA (second row).

1389 **(K)** Example coronal section of Pitx2-Cre mice showing expression of EGFP and TeNT in  
1390 Pitx2+ neurons that were predominantly distributed in the SC intermediate layers (In).

1391 **(L)** Time courses of locomotion speed of Pitx2-Cre mice without (Ctrl) and without (TeNT)  
1392 inactivation of Pitx2+ SC neurons before, during and after the sweep of overhead moving  
1393 visual target.

1394 **(M-O)** Quantitative analyses of locomotion speed of Pitx2-Cre mice without (Ctrl) and  
1395 with (TeNT) inactivation of Pitx2+ SC neurons before (M), during (N), and after (O) the  
1396 sweep of overhead moving visual target.

1397 Data in (G-I, M-O) are mean  $\pm$  SEM. Statistical analyses in (G-I, M-O) were performed  
1398 with Student t-test (n.s.,  $P > 0.1$ ). For P values, see Table S9. Scale bars are indicated in  
1399 the graph.

1400

1401 **Figure S4 Sensory response properties of Cbln2+ and Pitx2+ SC neurons**

1402 **(A)** Distribution of receptive field centers (red spots) of recorded Cbln2+ SC neurons in  
1403 five Cbln2-IRES-Cre mice in the meridian plot of the mouse retina on the tangent screen.  
1404 The coordinate origin of the meridian plot was the visual axis. Concentric circles were  
1405 spaced by 15° visual angles. Note the receptive fields of Cbln2+ SC neurons were  
1406 localized within the dorsal quadrant, consistent with their role in detecting aerial predator.

1407 **(B)** Normalized GCaMP fluorescence changes ( $\Delta F/F$ ) of Cbln2+ SC neurons in response  
1408 to air-puffs directed toward contralateral or ipsilateral vibrissal area with different  
1409 strengths (10, 20, 30 p.s.i.).

1410 **(C)** Normalized GCaMP fluorescence changes ( $\Delta F/F$ ) of Pitx2+ SC neurons in response  
1411 to a black circle (5°) moving (32°/s) in different directions (T-to-N, N-to-T, V-to-D, D-to-V).  
1412 N, D, T and V represent nasal, dorsal, temporal and ventral, respectively.

1413 **(D)** Normalized GCaMP fluorescence changes ( $\Delta F/F$ ) of Pitx2+ SC neurons in response  
1414 to a black circle (5°) moving (T-to-N) with different velocity (32°/s and 128°/s).

1415 **(E)** Normalized GCaMP fluorescence changes ( $\Delta F/F$ ) of Pitx2+ SC neurons in response  
1416 to a moving black circle with different diameters (5° and 25°) (T-to-N, 32°/s).

1417



1418 **Figure S5 RV tracing of Cbln2+ and Pitx2+ SC neurons**

1419 **(A, B)** Example micrographs showing the expression of EGFP (green) and DsRed (red)  
1420 in the Cbln2+ and Pitx2+ neurons in the SC of Cbln2-IRES-Cre (A) and Pitx2-Cre mice  
1421 (B), respectively. Note the dually-labeled cells indicate starter cells.

1422 **(C-F)** Example micrographs showing DsRed+ cells in different brain regions, including  
1423 contralateral spinal trigeminal nucleus interpolar part (Sp5I) and the PCRt (C), the  
1424 ipsilateral zona incerta (ZI) (D), the substantia nigra reticular part (SNr) (E), and the  
1425 ipsilateral M1/M2 & Cg1/2 (F) of Cbln2-IRES-Cre and Pitx2-Cre mice.

1426

1427 **Figure S6 Efferent projections of Cbln2+ and Pitx2+ SC neurons**

1428 **(A)** Schematic diagram showing the strategy to map the efferent projections of Cbln2+  
1429 and Pitx2+ SC neurons.

1430 **(B)** Example coronal sections of Cbln2-IRES-Cre and Pitx2-Cre mice showing the  
1431 distribution of infected neurons in the SC.

1432 **(C-F)** Example micrographs showing EGFP+ axons of Cbln2+ and Pitx2+ SC neurons in  
1433 the target brain regions at the level of thalamus (C), midbrain (D), pons (E), and medulla  
1434 (F). Abbreviations: LPTN, lateral posterior thalamic nucleus; PF, parafascicular nucleus;  
1435 ZI, zona incerta; Pn, pontine nucleus; LPB, lateral parabrachial nucleus; IO, inferior olive;  
1436 PCRt, parvicellular reticular nucleus; LDTg, laterodorsal tegmental nucleus; IRt,  
1437 intermediate reticular nucleus; PAG, periaqueductal gray; ECIC, external cortex of the  
1438 inferior colliculus; Tz, nucleus of the trapezoid body. Scale bars are labeled in the  
1439 graphs.

1440

1441 **Figure S7 Activation of Cbln2+ SC-LPTN pathway and Pitx2+ SC-ZI pathway**  
1442 **(A)** Schematic diagram showing whole-cell recording from ChR2-mCherry+ SC neurons  
1443 in the acute brain slice.  
1444 **(B, C)** Example traces of phase-locked spiking activity evoked by light-pulse train (1 ms,  
1445 5 mW) in 10 Hz (top) or 20 Hz (bottom) from Cbln2+ SC neurons (B) or Pitx2+ SC  
1446 neurons (C) that expressed ChR2-mCherry in acute brain slices.  
1447 **(D)** Behavioral ethogram of predatory hunting in mice without (Laser OFF) and with  
1448 (Laser ON) light stimulation of Cbln2+ SC-LPTN pathway.  
1449 **(E)** Quantitative analyses of latency to attack (left), time to capture (middle), and attack  
1450 frequency (right) in mice without (Laser OFF) and with (Laser ON) light stimulation of  
1451 Cbln2+ SC-LPTN pathway.  
1452 **(F)** Time courses of locomotion speed before, during and after light stimulation of Pitx2+  
1453 SC-ZI pathway that expressed mCherry (Ctrl) or ChR2-mCherry (ChR2).  
1454 **(G)** Quantitative analyses of locomotion speed before, during and after light stimulation  
1455 of Pitx2+ SC-ZI pathway that expressed mCherry (Ctrl) or ChR2-mCherry (ChR2).  
1456 Data in (E-G) are mean  $\pm$  SEM. Statistical analyses in (E, G) were performed with  
1457 Student t-test (n.s.,  $P > 0.1$ ). For P values, see Table S9.  
1458

1459 **Supplementary Tables**

1460 **Table S1.** Sample information for high-throughput snRNA-seq of nucleus from superior  
1461 colliculus (SC) and top50 differentially expressed genes among 9 major cell types in SC,  
1462 related to Figure 1A.

1463 **Table S2.** Differentially expressed genes among 9 excitatory neuron subtypes and 10  
1464 inhibitory neuron subtypes, related to Figure 1C and 1D.

1465 **Table S3.** Sample information for Patch-seq of neurons from superior colliculus (SC),  
1466 related to Figure 2H.

1467 **Table S4.** Differentially expressed genes between ZI- and LPTN-projecting neurons in  
1468 SC, related to Figure 2I.

1469 **Table S5.** Differentially expressed genes between excitatory neuron subtype Ex-3 and  
1470 Ex-6, and between Ex-1 and Ex-4, related to Figure 2L, 2M respectively.

1471 **Table S6.** Information of mouse lines and reagents.

1472 **Table S7.** Summary of all experimental designs.

1473 **Table S8.** Summary of cell-counting strategies.

1474 **Table S9.** Summary of statistical analyses.

1475

1476 **Supplementary Movies**

1477 **Movie S1.** 3D reconstruction of layer-specific neuron projection patterns from SC to  
1478 downstream brain regions by in vivo sparse-labeling strategy and M-CRITIC, related to  
1479 Figure 2B and 2C.

1480 **Movie S2.** An example movie showing that synaptic inactivation of Cbln2+ SC neurons  
1481 by TeNT impaired visually-evoked freezing responses. Related to Figure 3D.

1482 **Movie S3.** An example movie showing that synaptic inactivation of Pitx2+ SC neurons by  
1483 TeNT impaired prey capture behavior in the arena. Related to Figure 3K.

1484 **Movie S4.** An example movie showing that light stimulation of ChR2-mCherry+ axon  
1485 terminals of Cbln2+ SC neurons in the LPTN induced freezing response in mice. Related  
1486 to Figure 7B and 7C.

1487 **Movie S5** An example movie showing light stimulation of ChR2-mCherry+ axon  
1488 terminals of Pitx2+ SC neurons in the ZI promoted predatory hunting behavior in mice,  
1489 related to Figure 7F and 7G.

1490

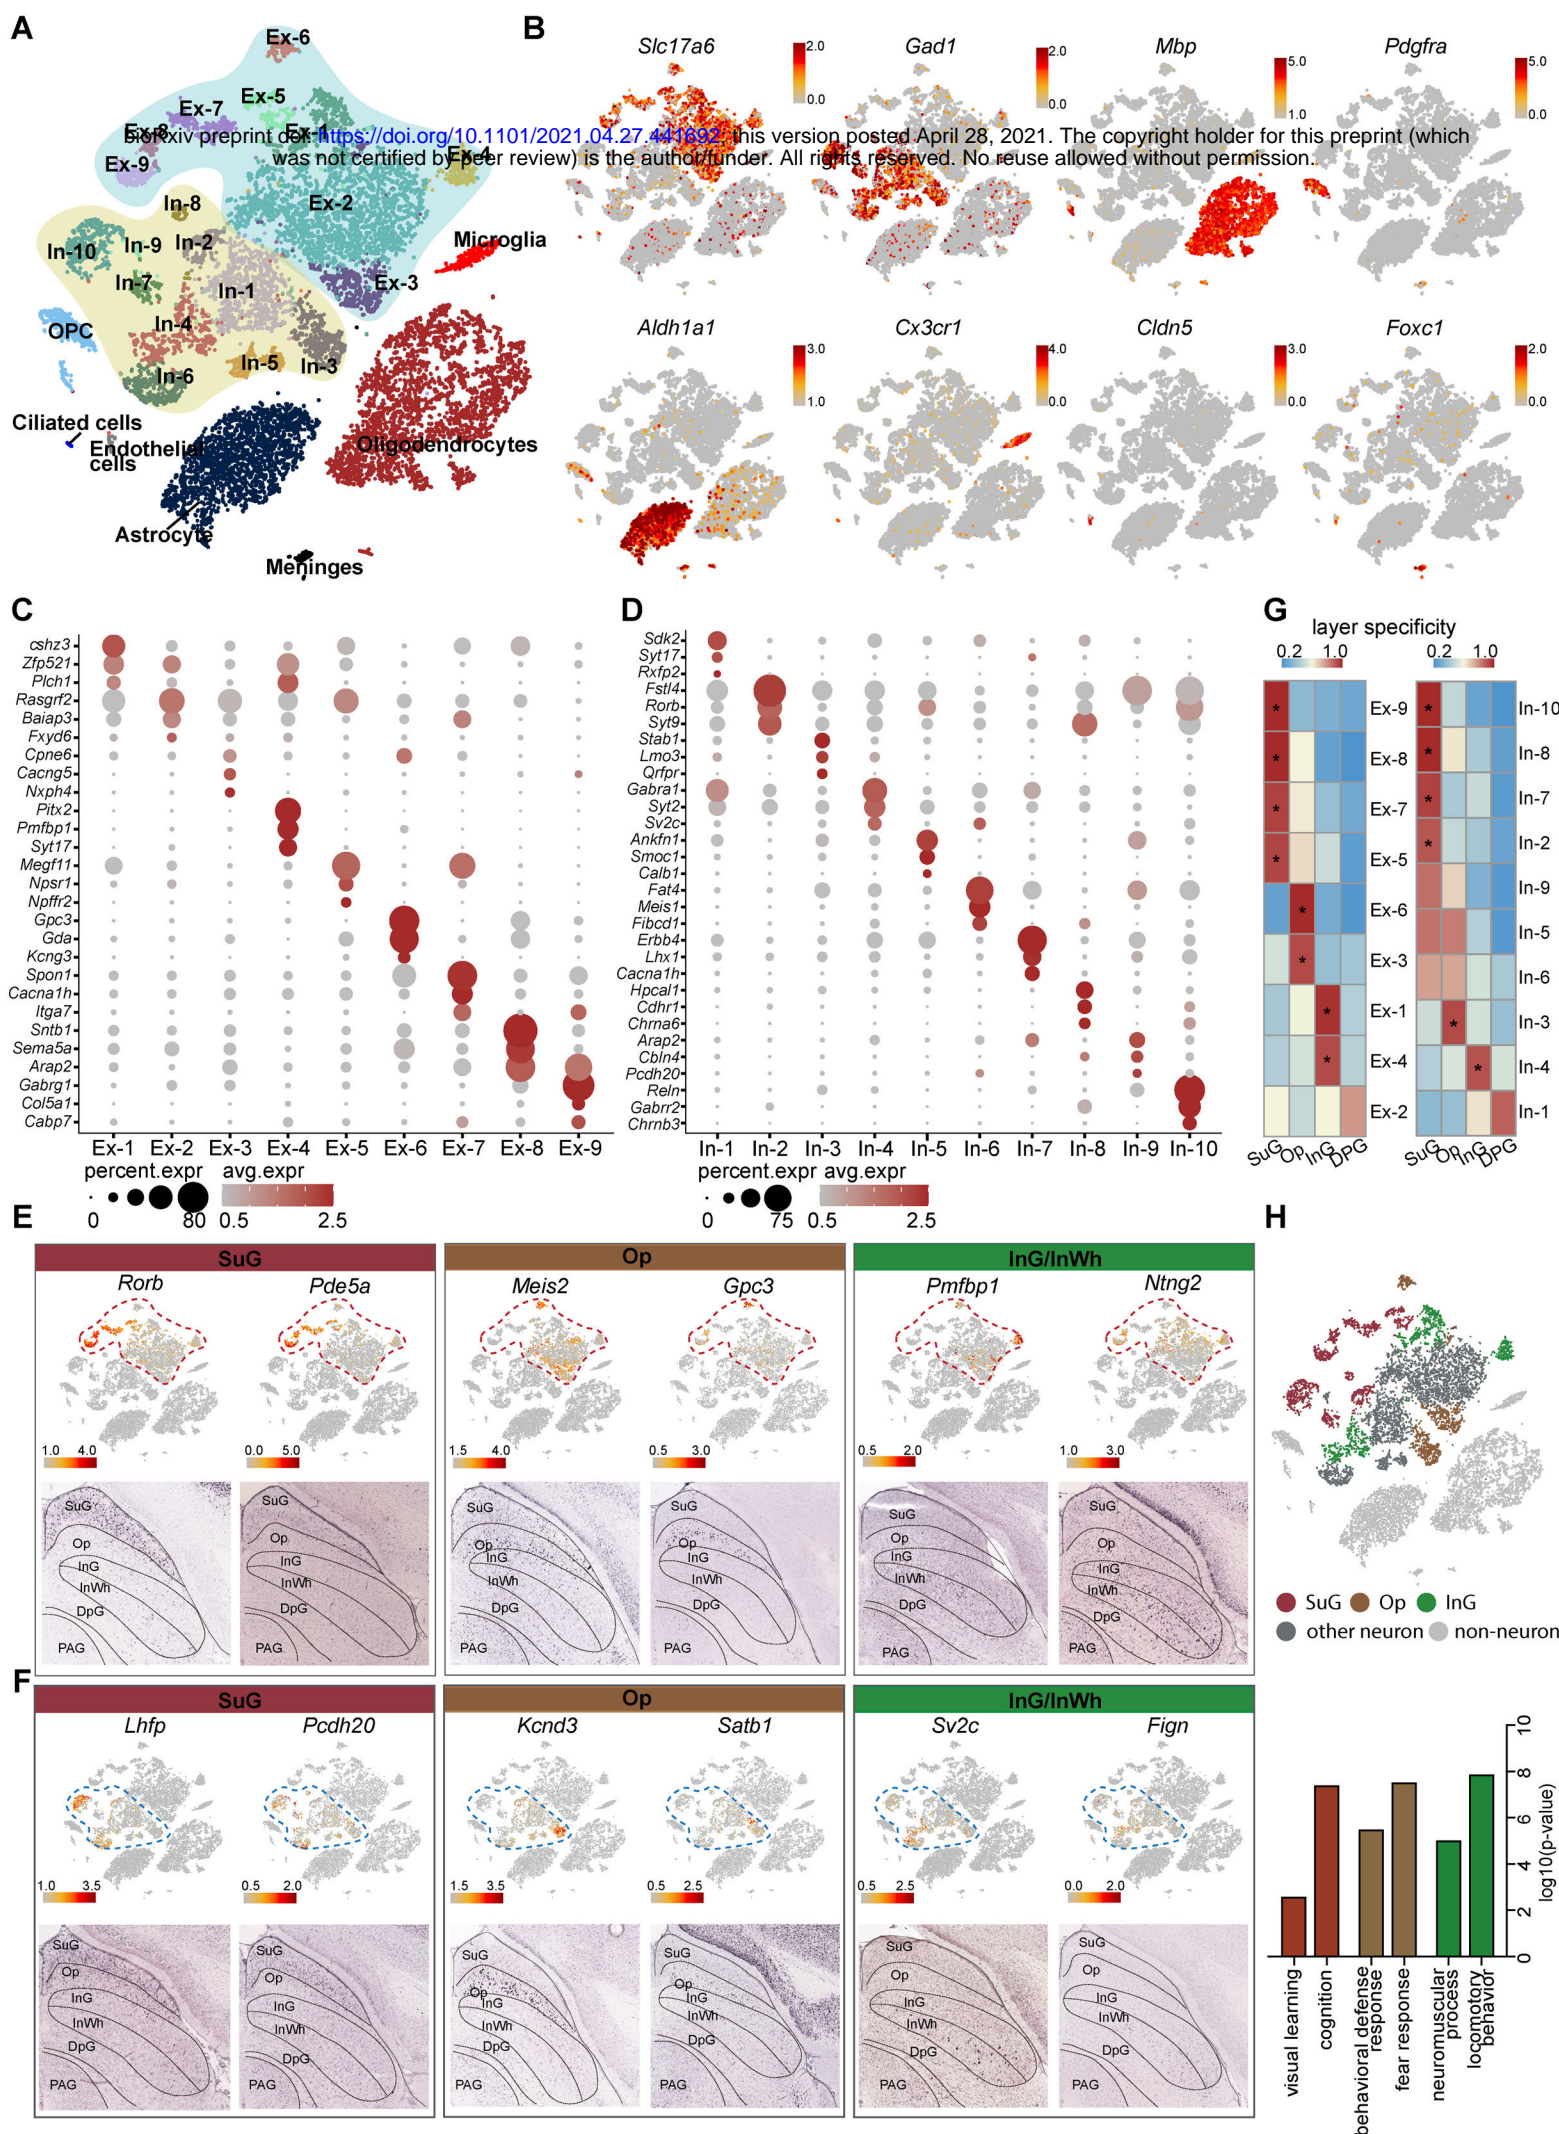

Figure 1 A census of SC cell types using snRNA-seq

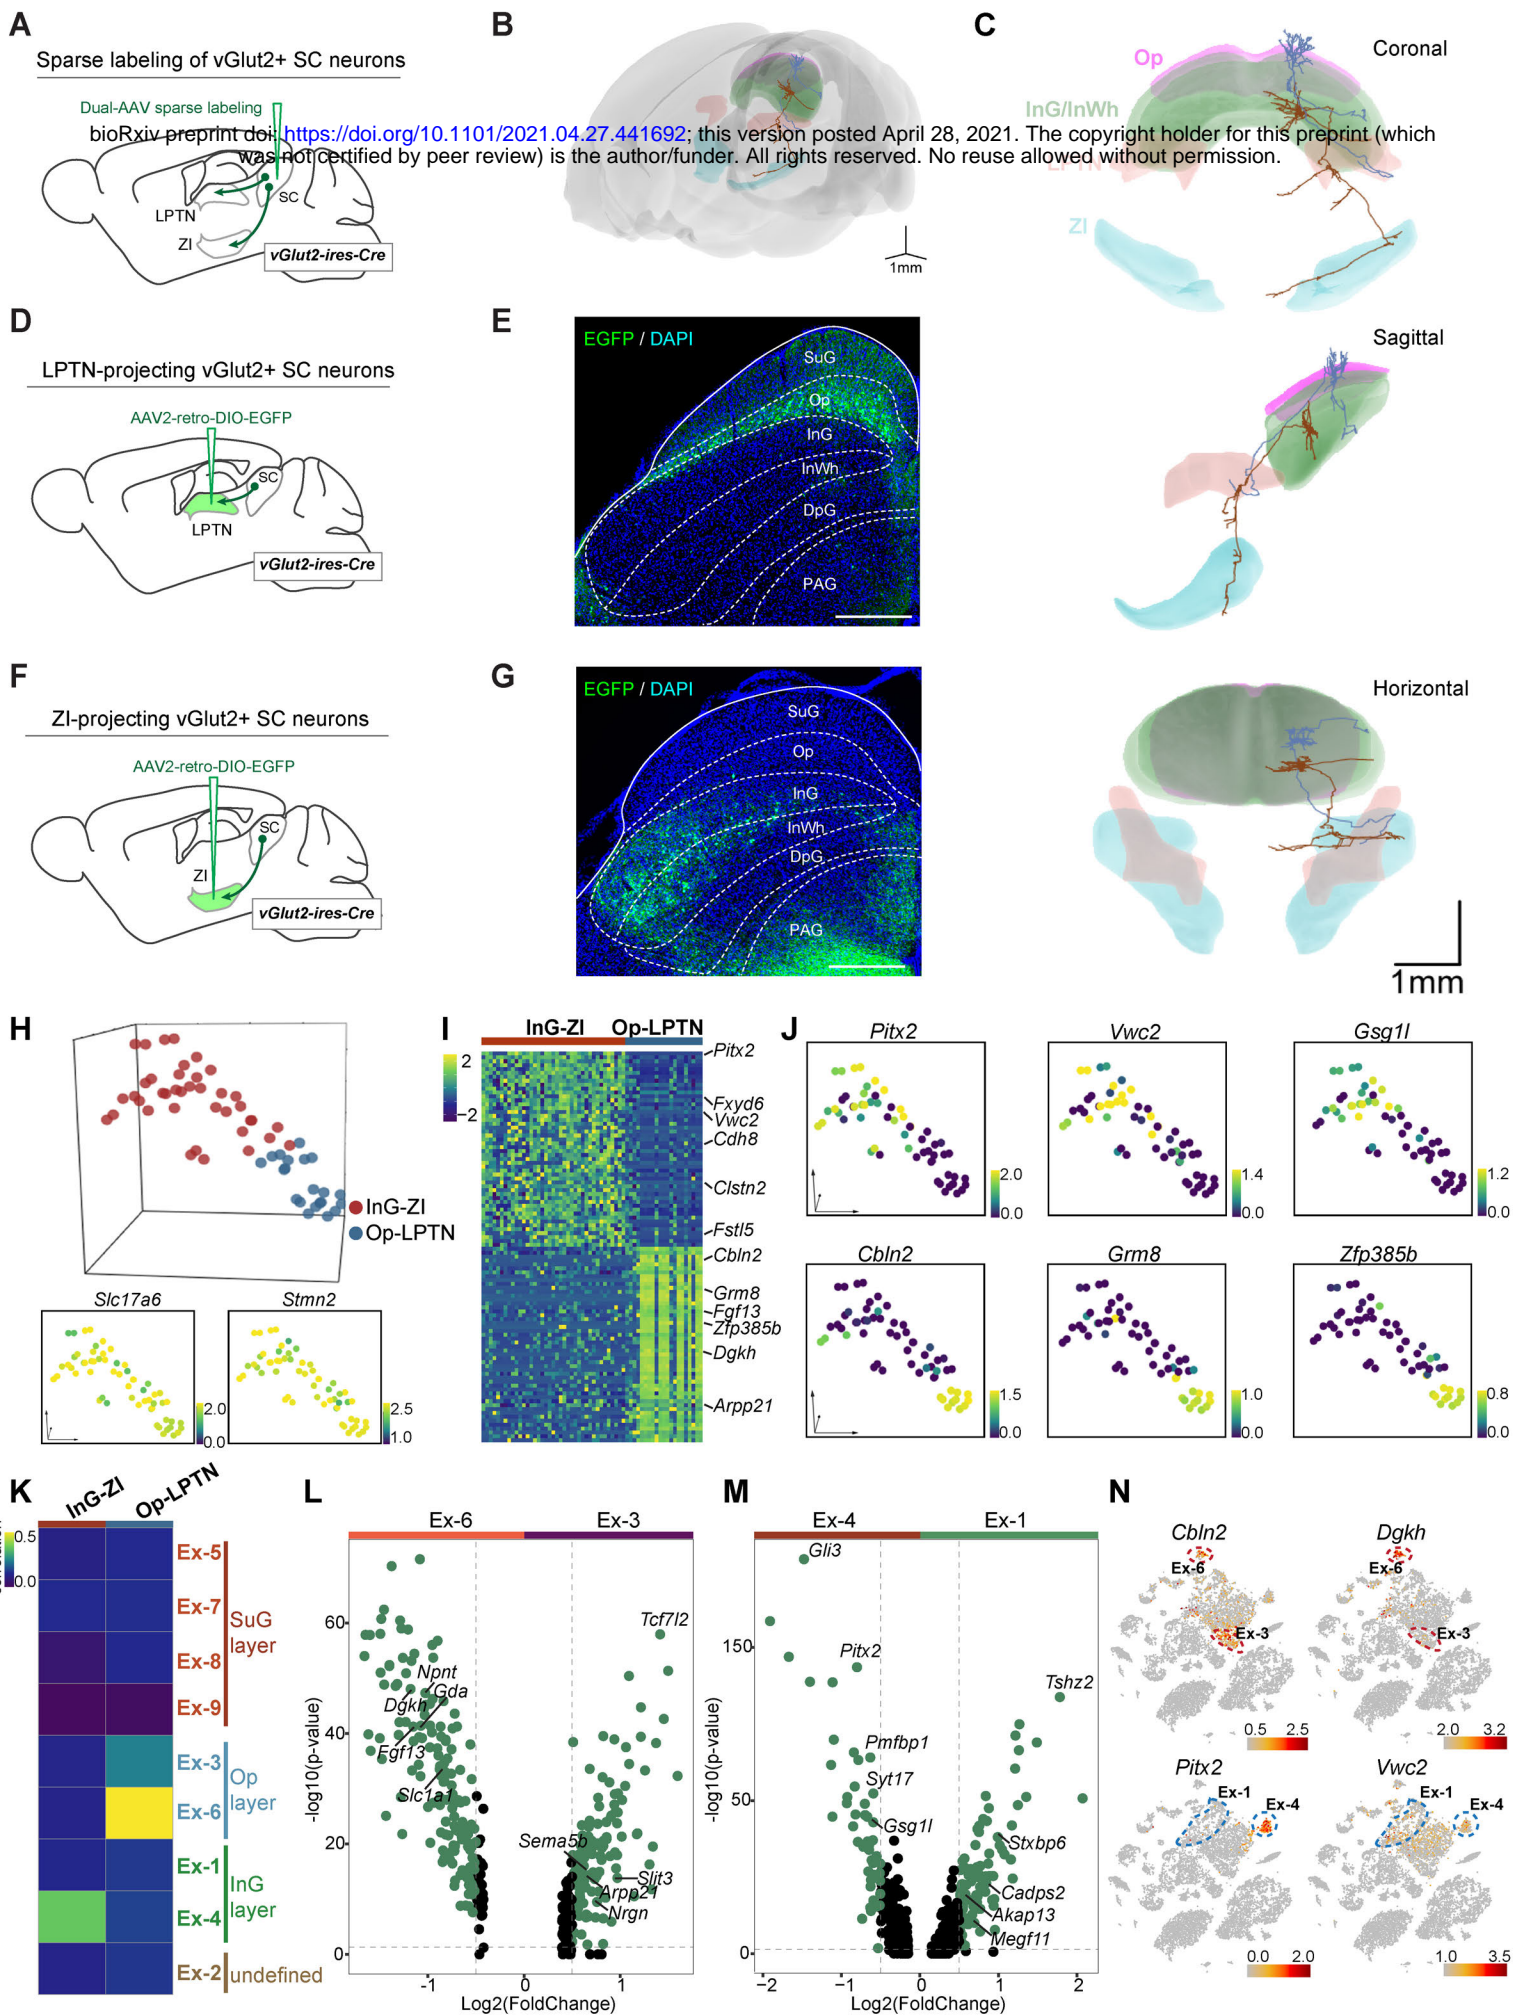

Figure 2 Circuit-specific single-cell transcriptomic analysis by Patch-seq

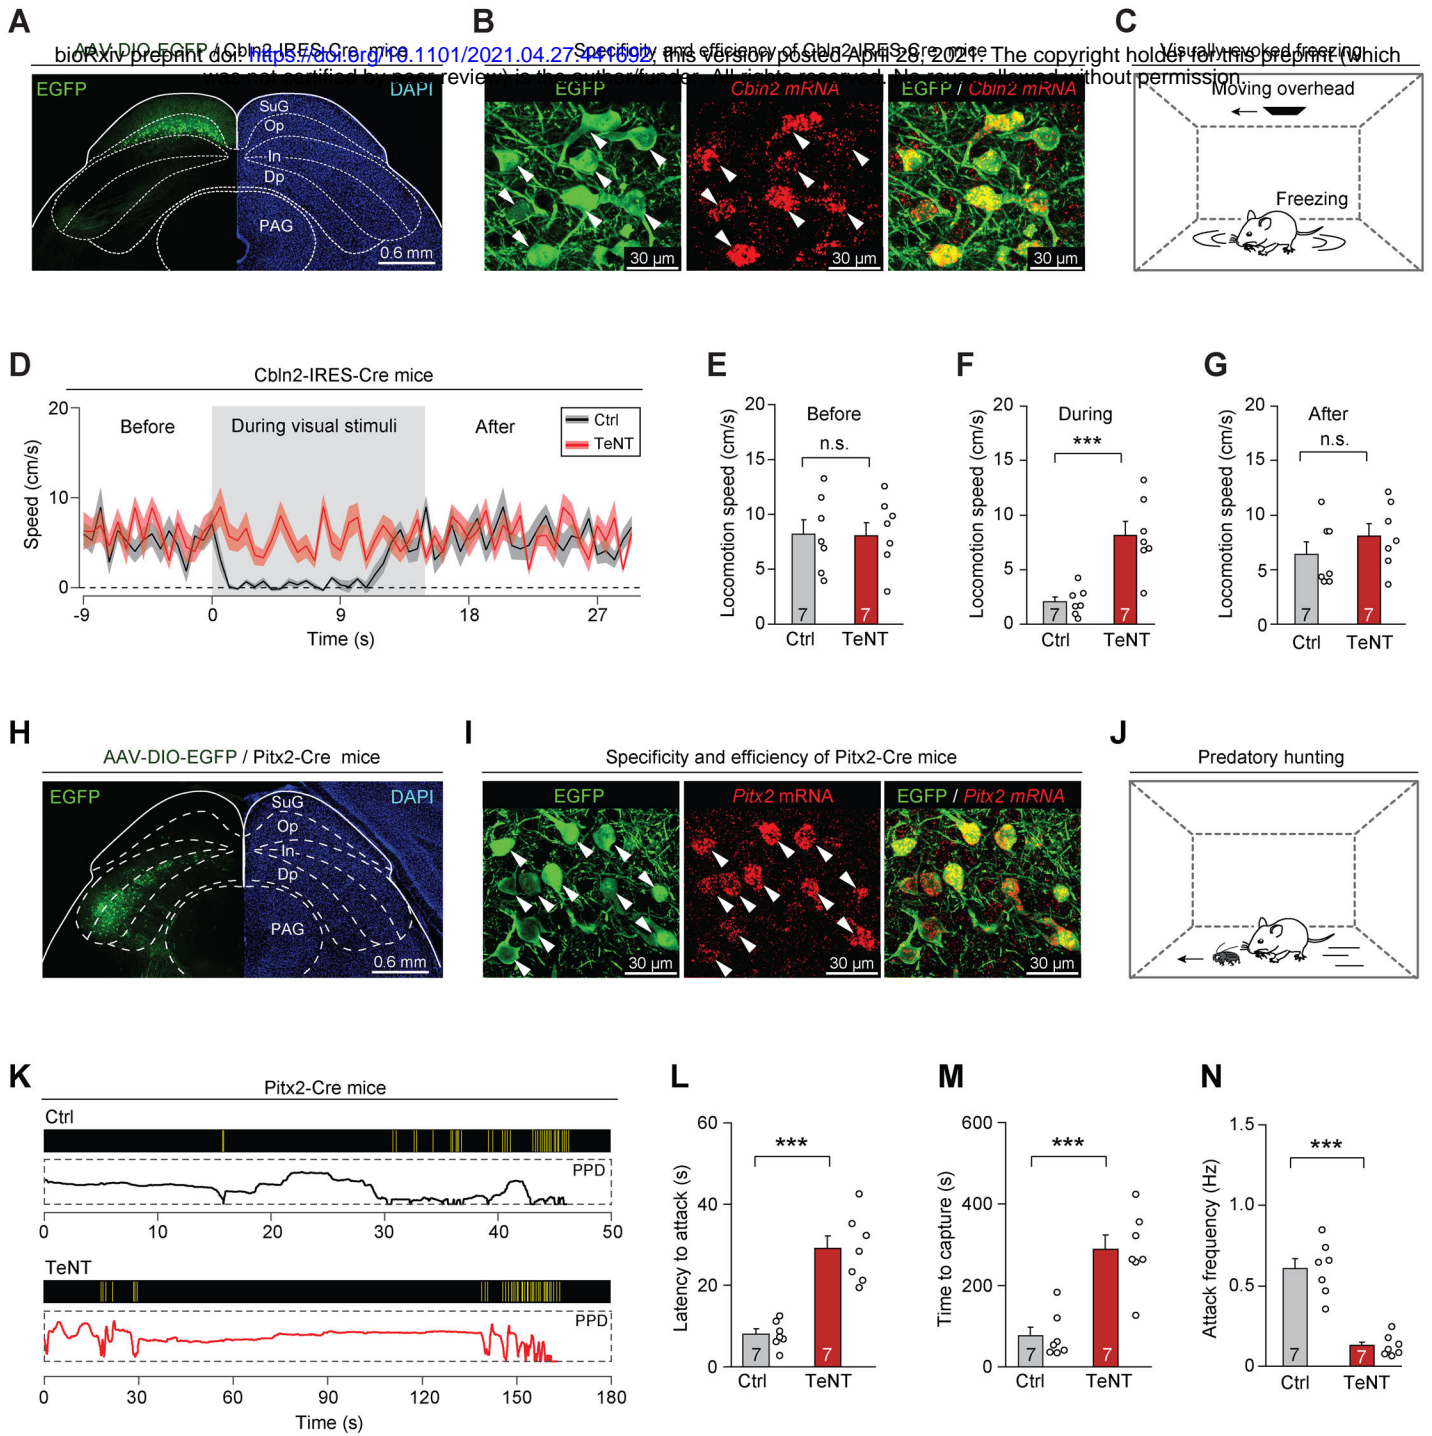

Figure 3 Inactivation of Cbln2+ and Pitx2+ SC neurons



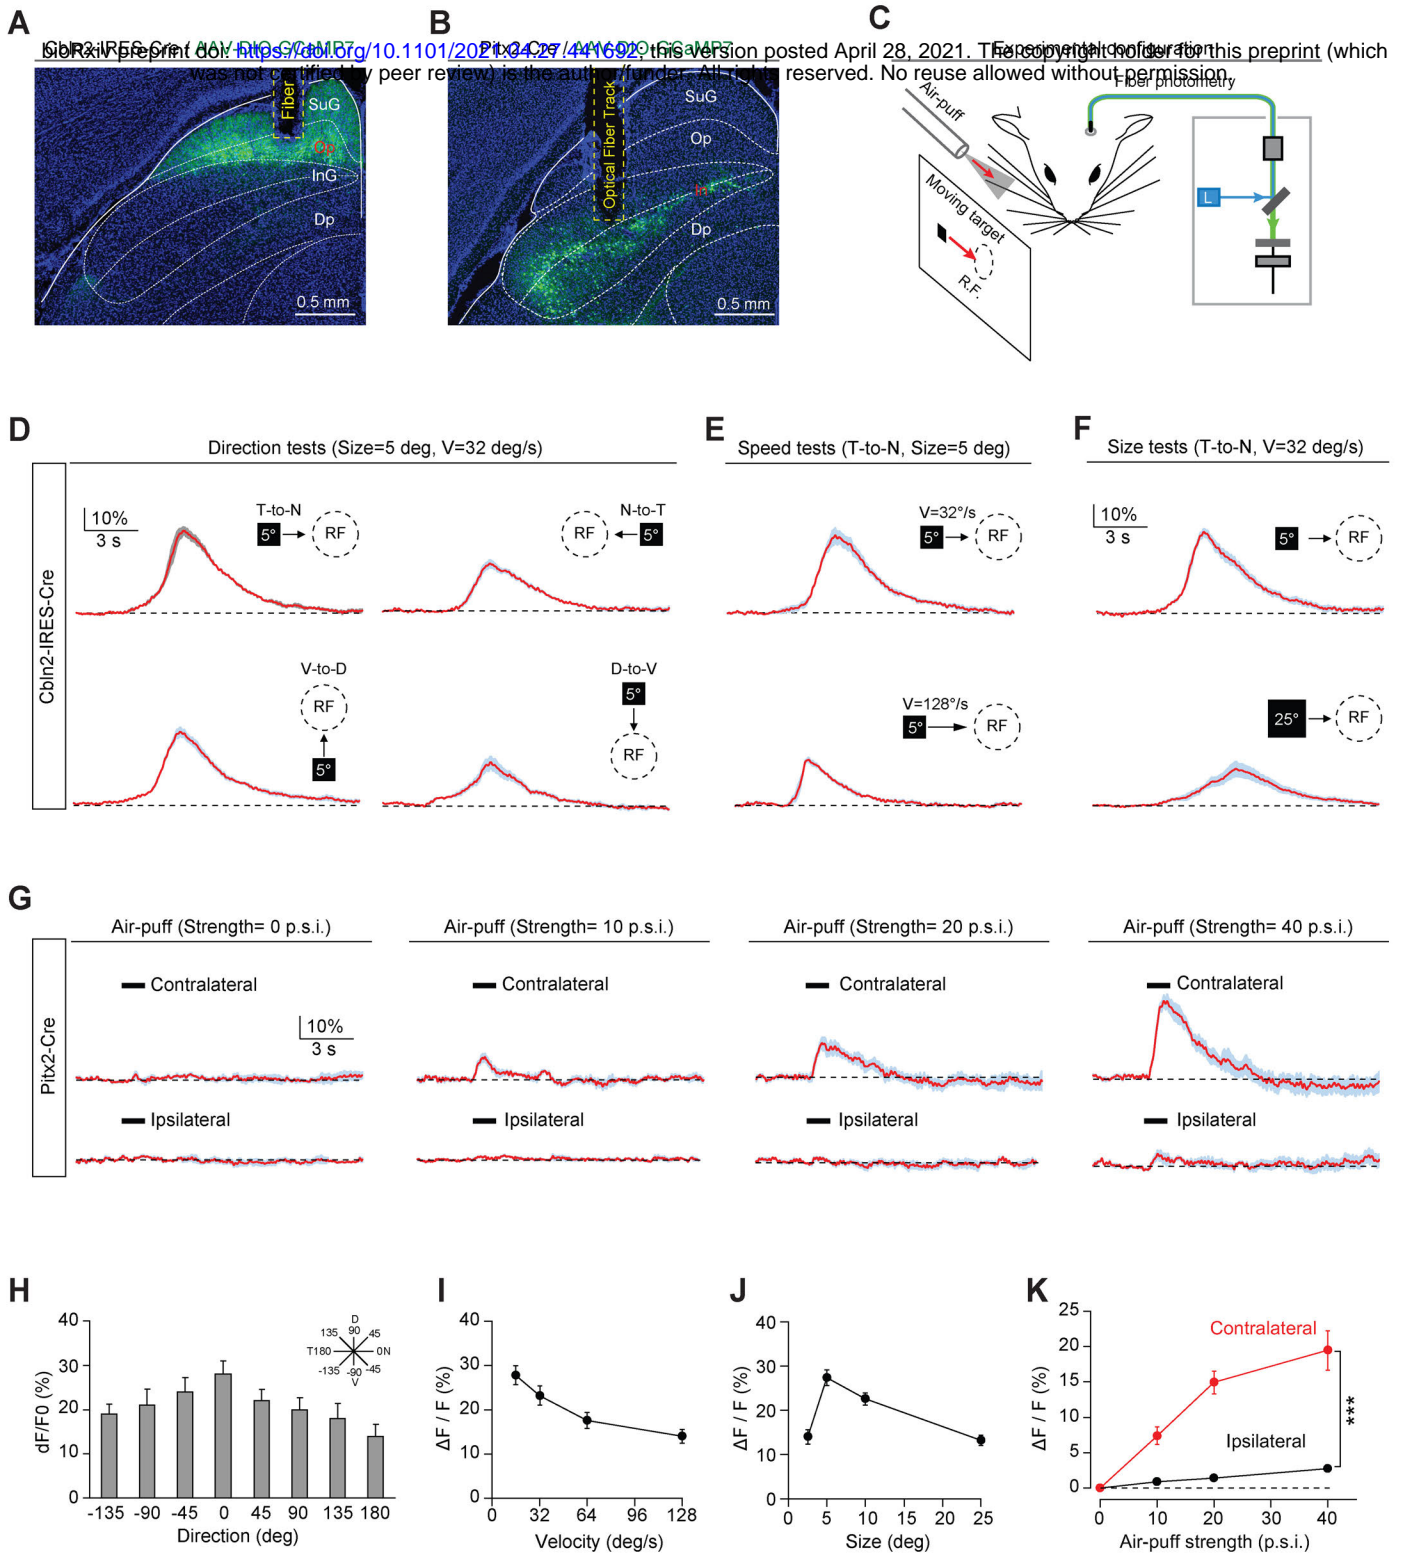

Figure 4 Sensory responses

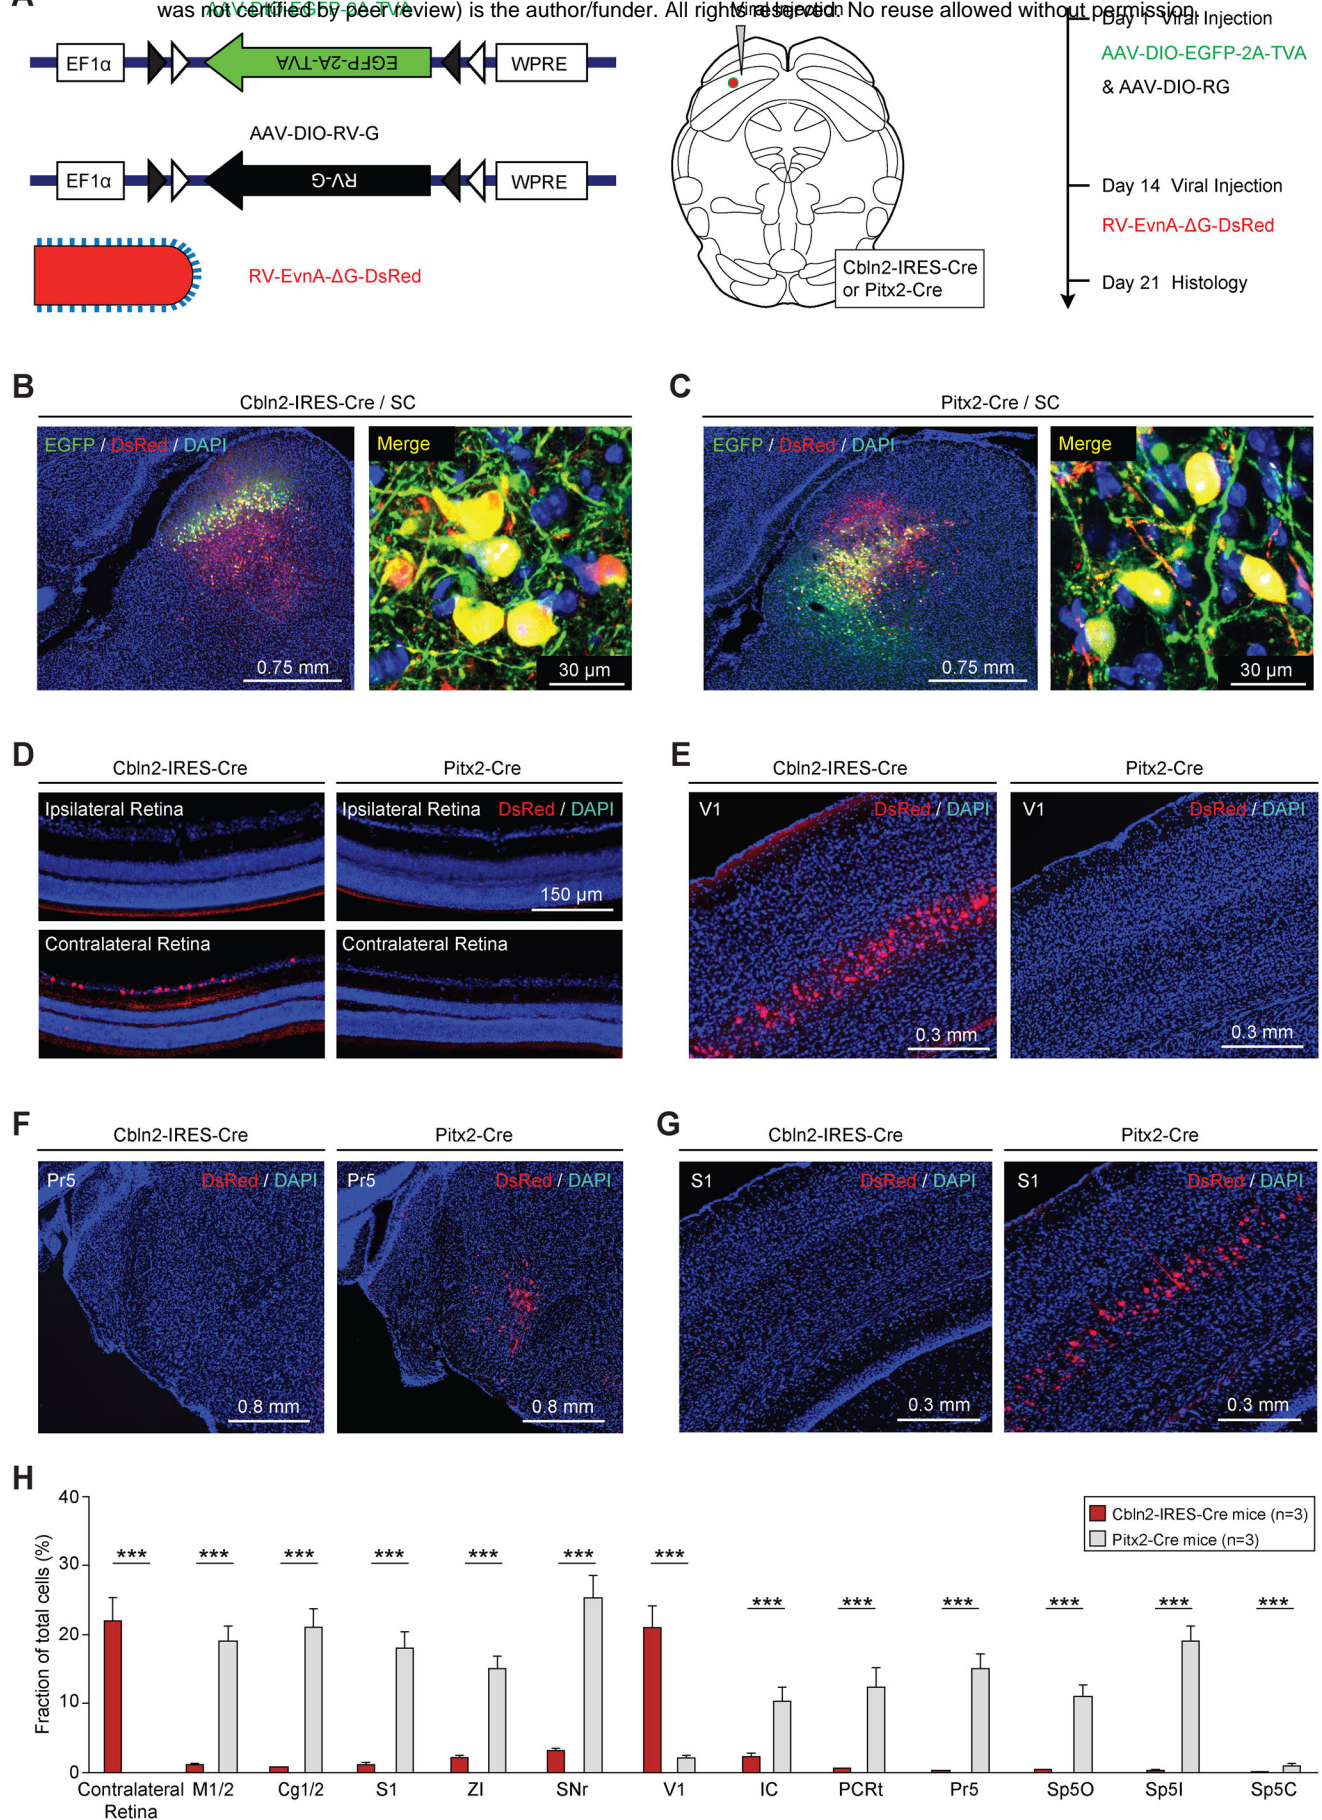

Figure 5 RV tracing

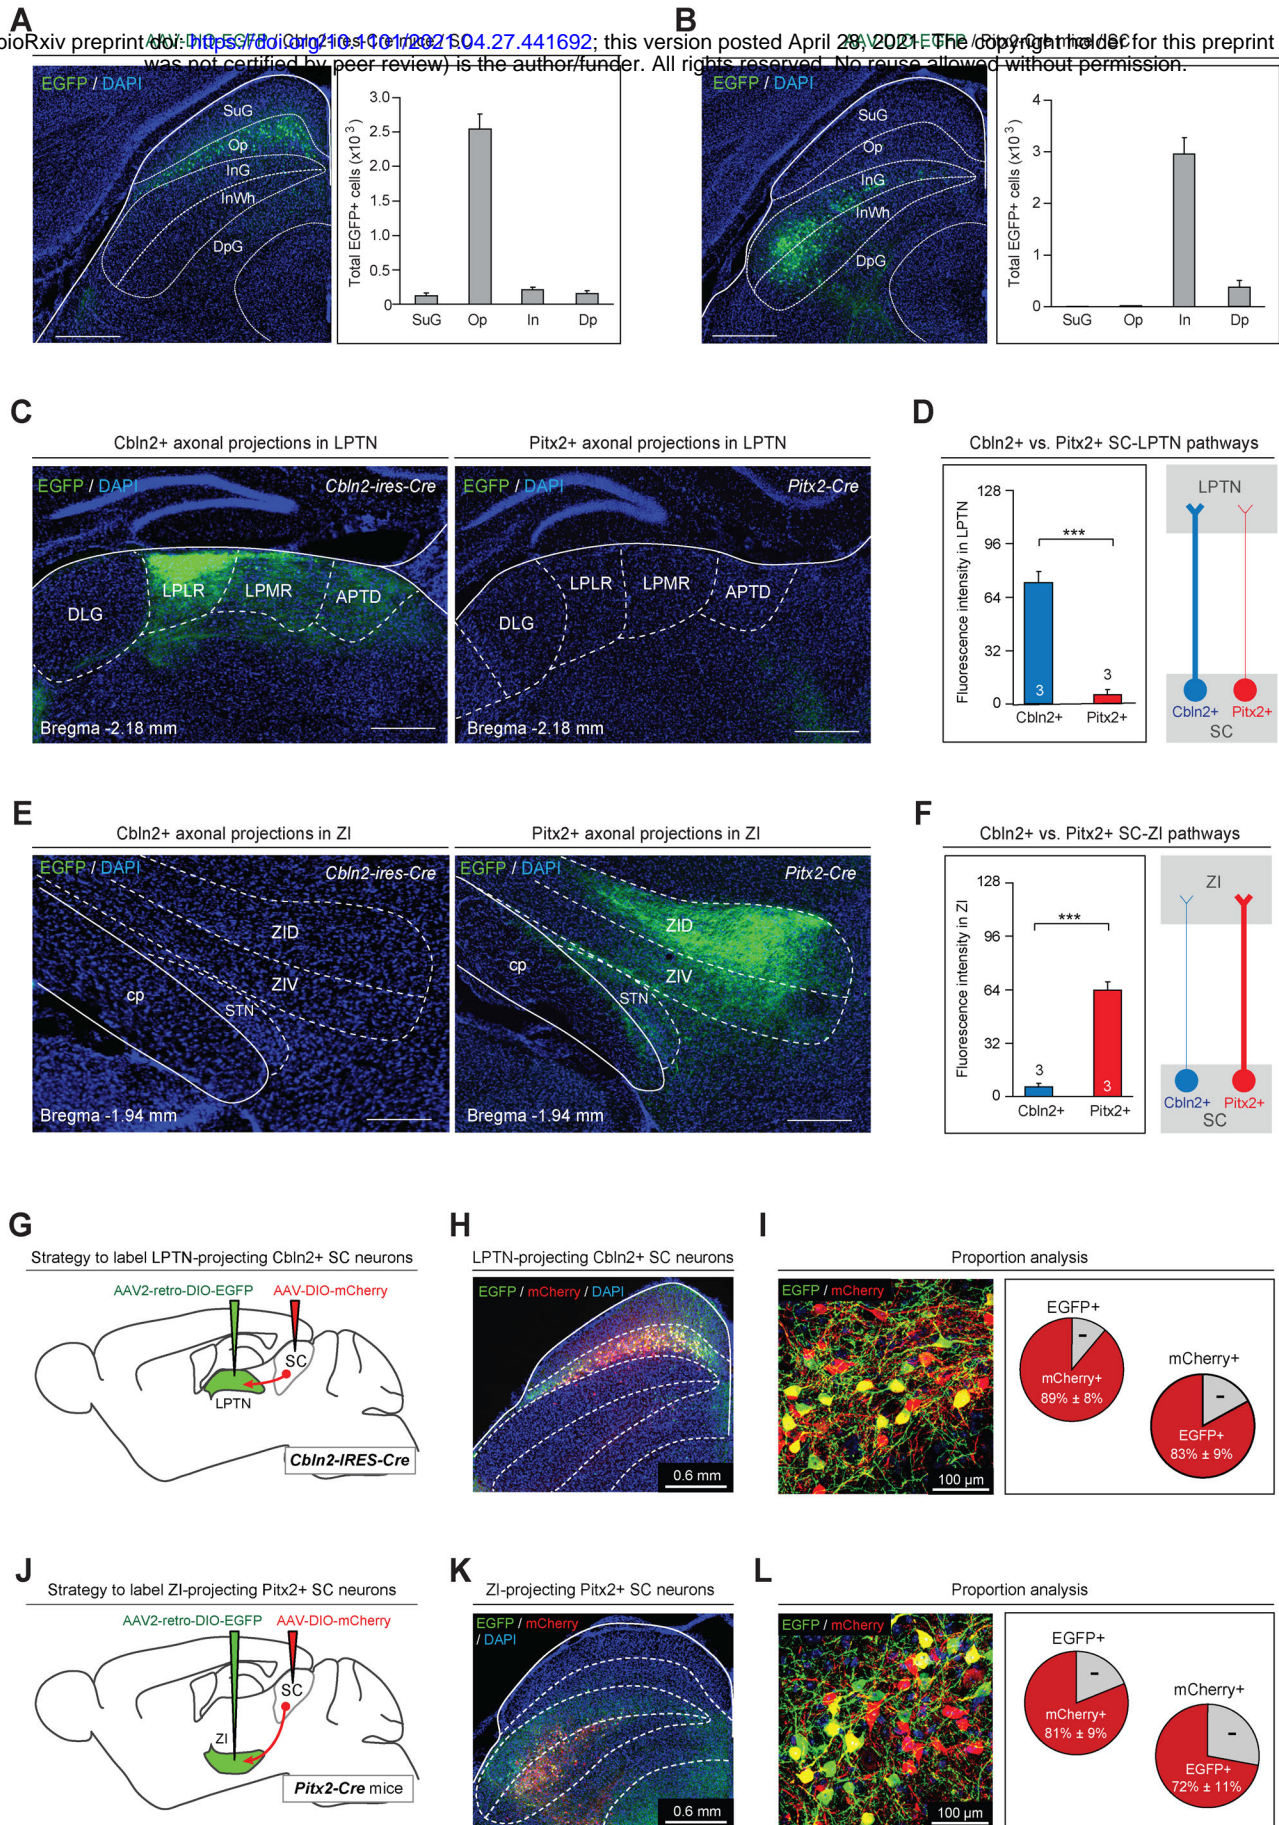

Figure 6 Projection of Cbln2+ and Pitx2+ neurons

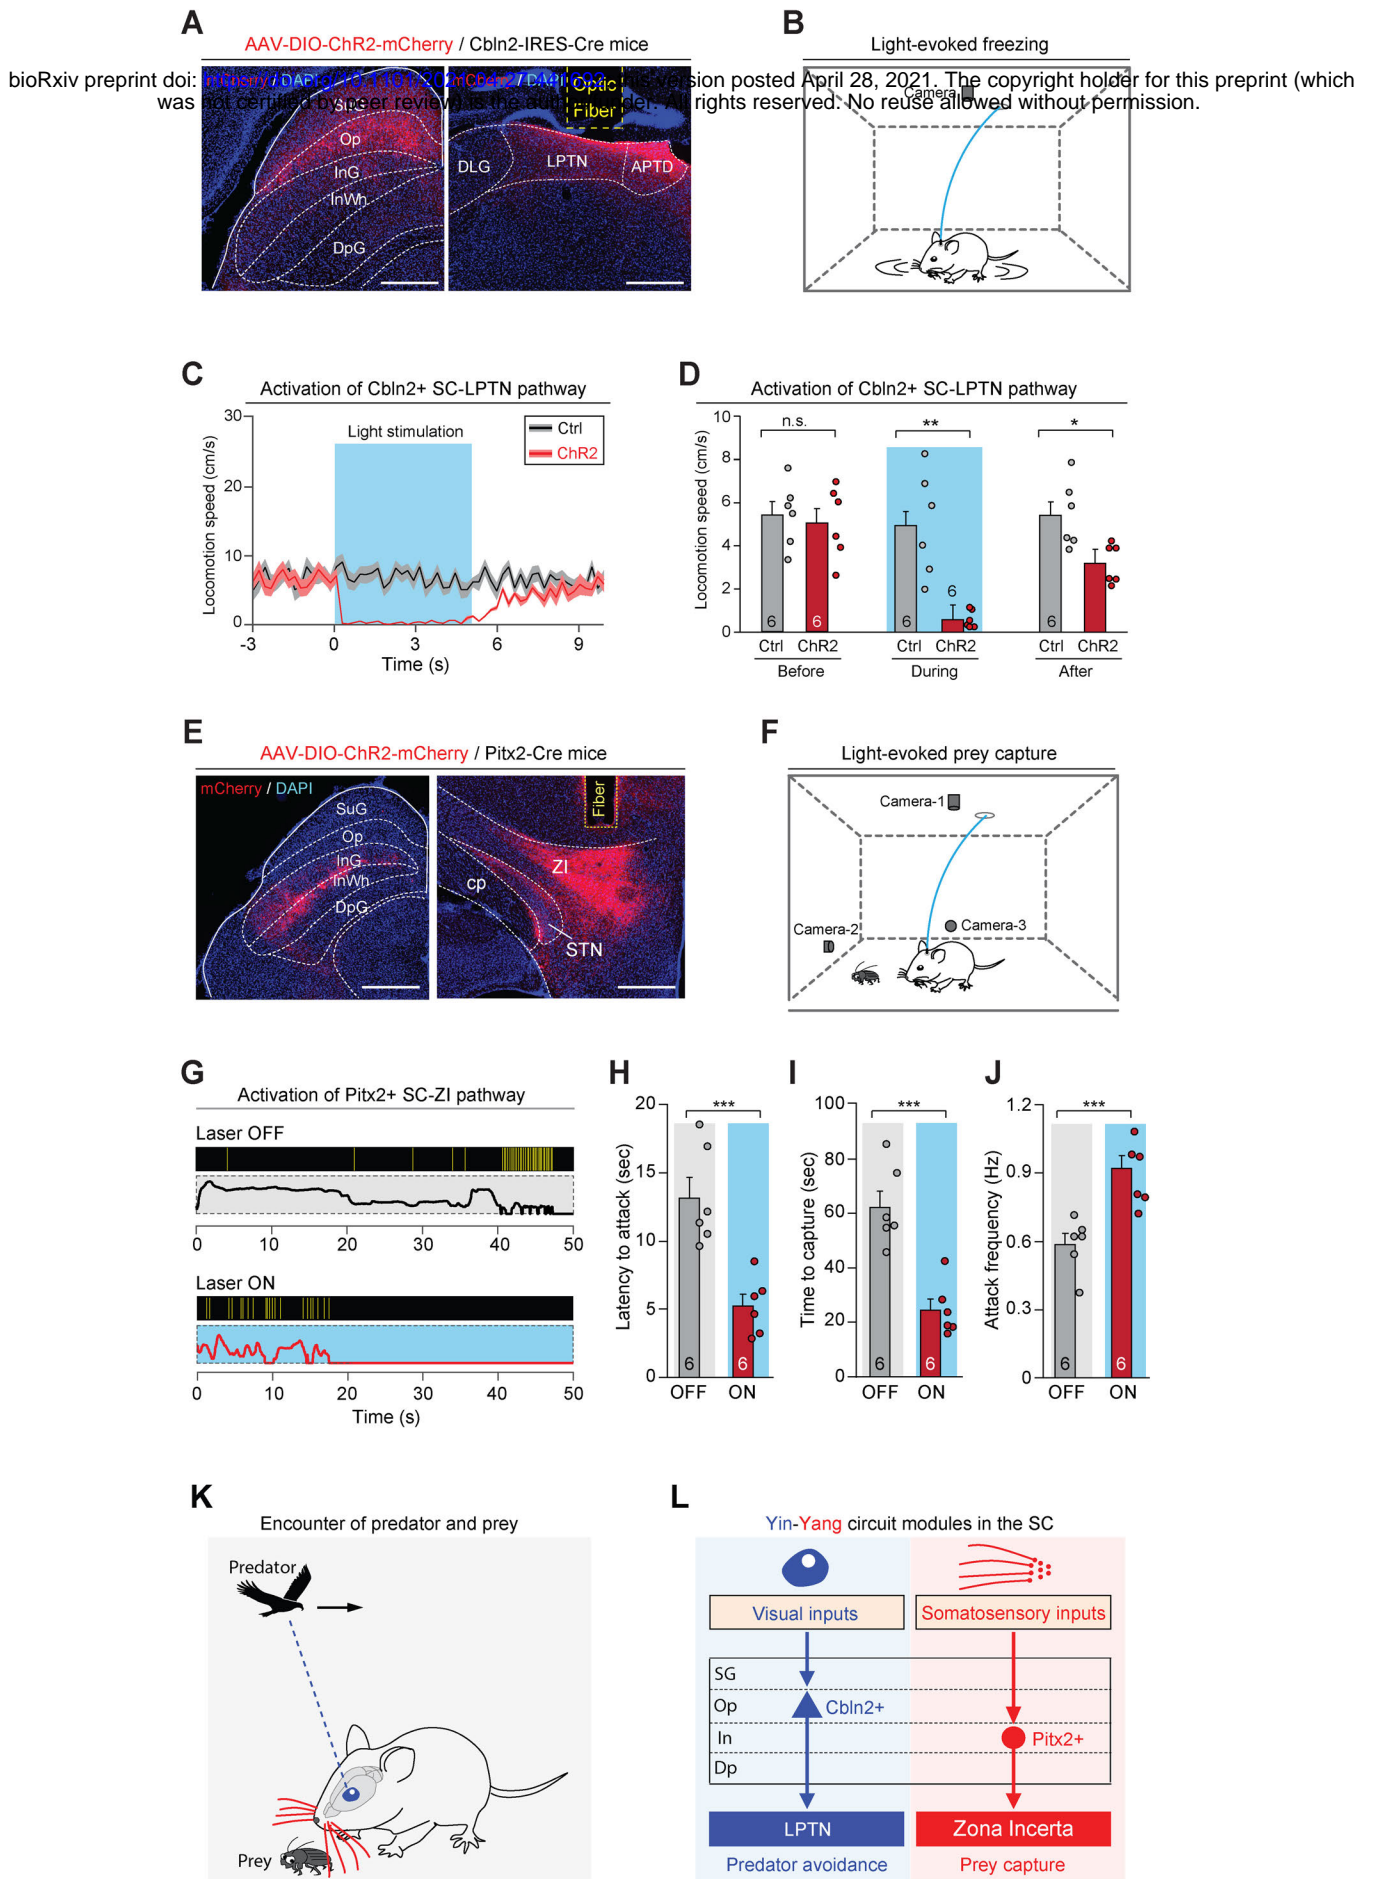

Figure 7 Activation of individual pathways

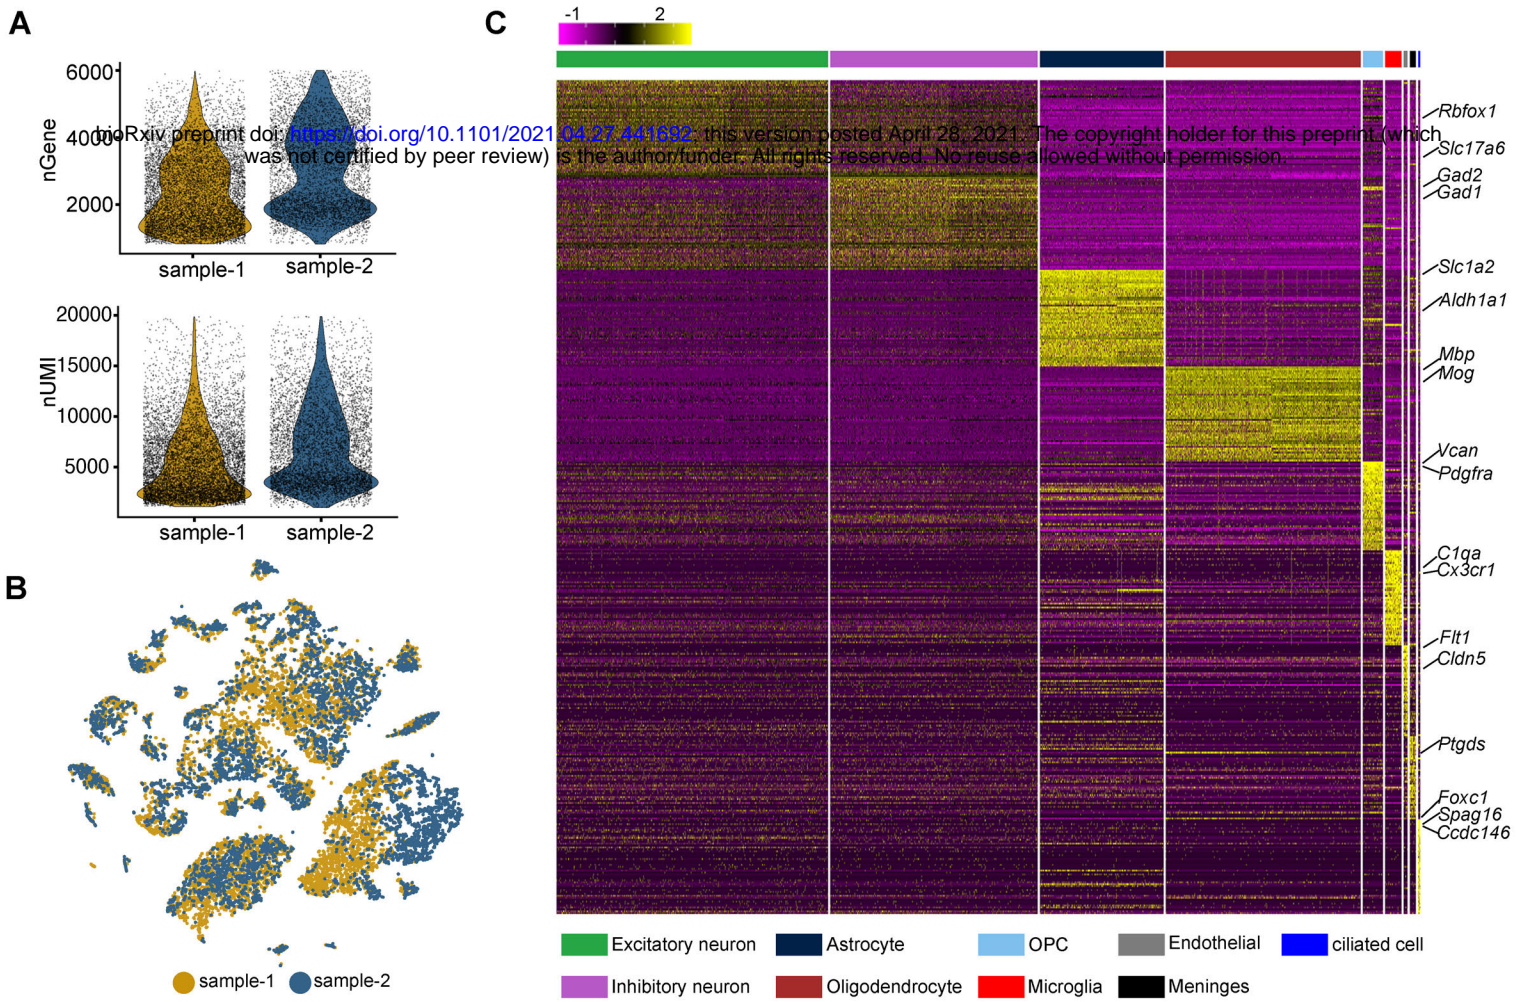

Figure S1 High-throughput snRNA-seq of human SC

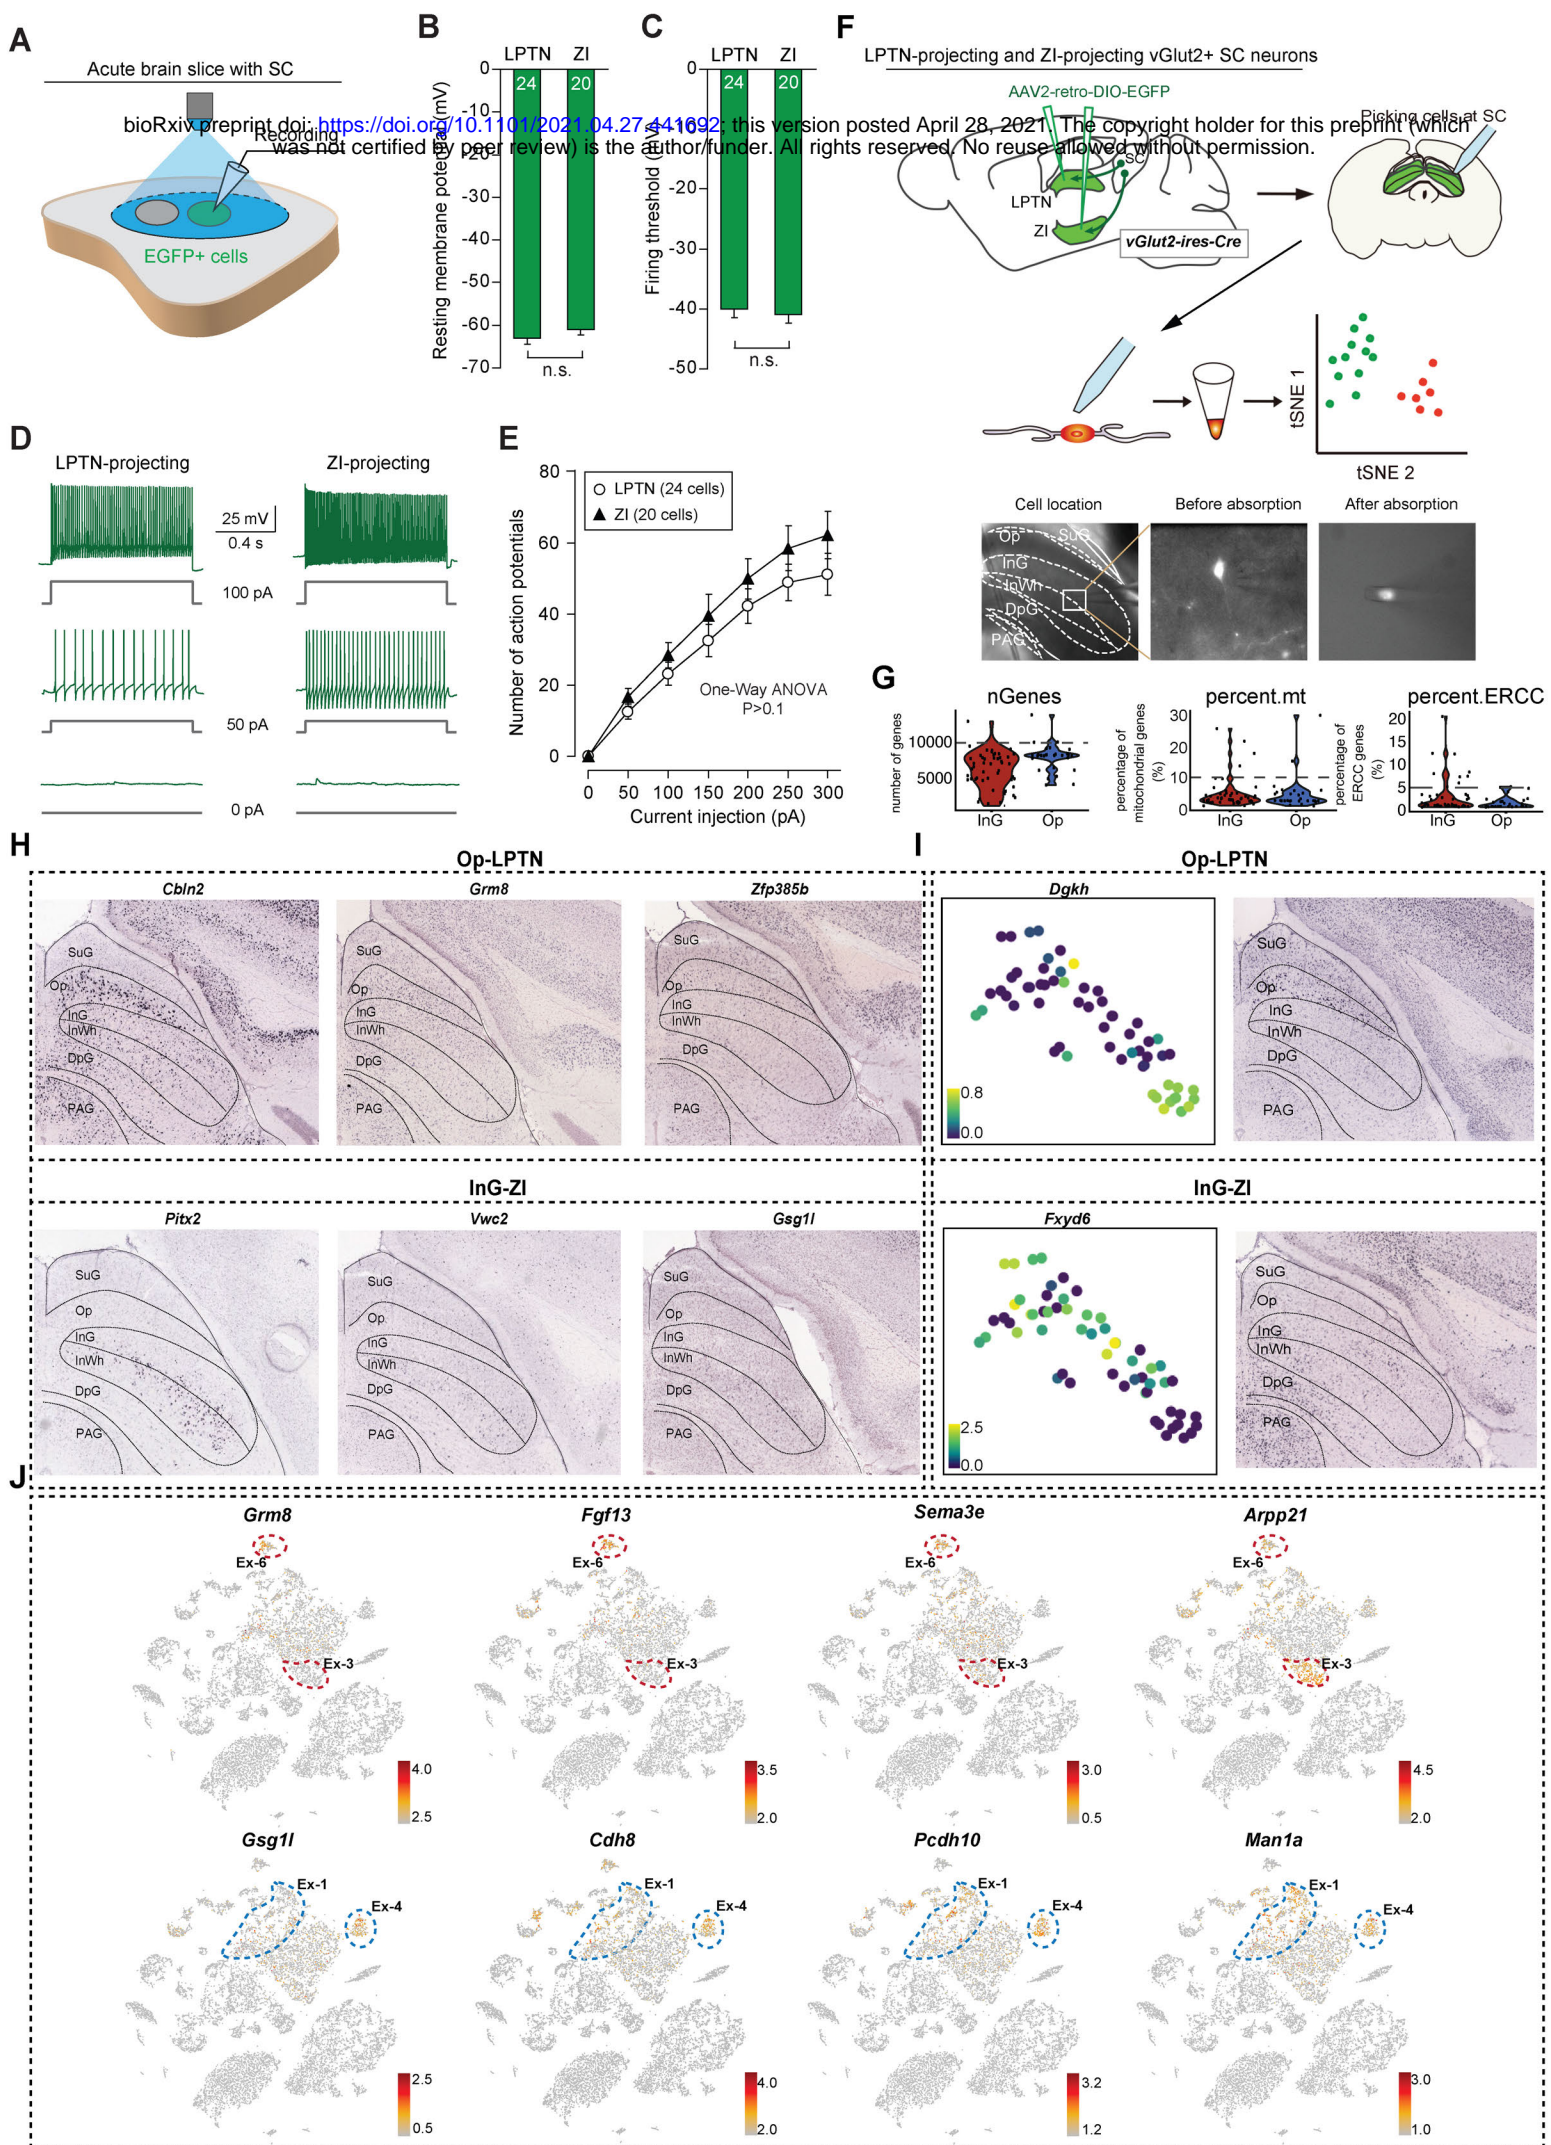

Figure S2 Patch-seq of Op-LPTN and InG-ZI neurons

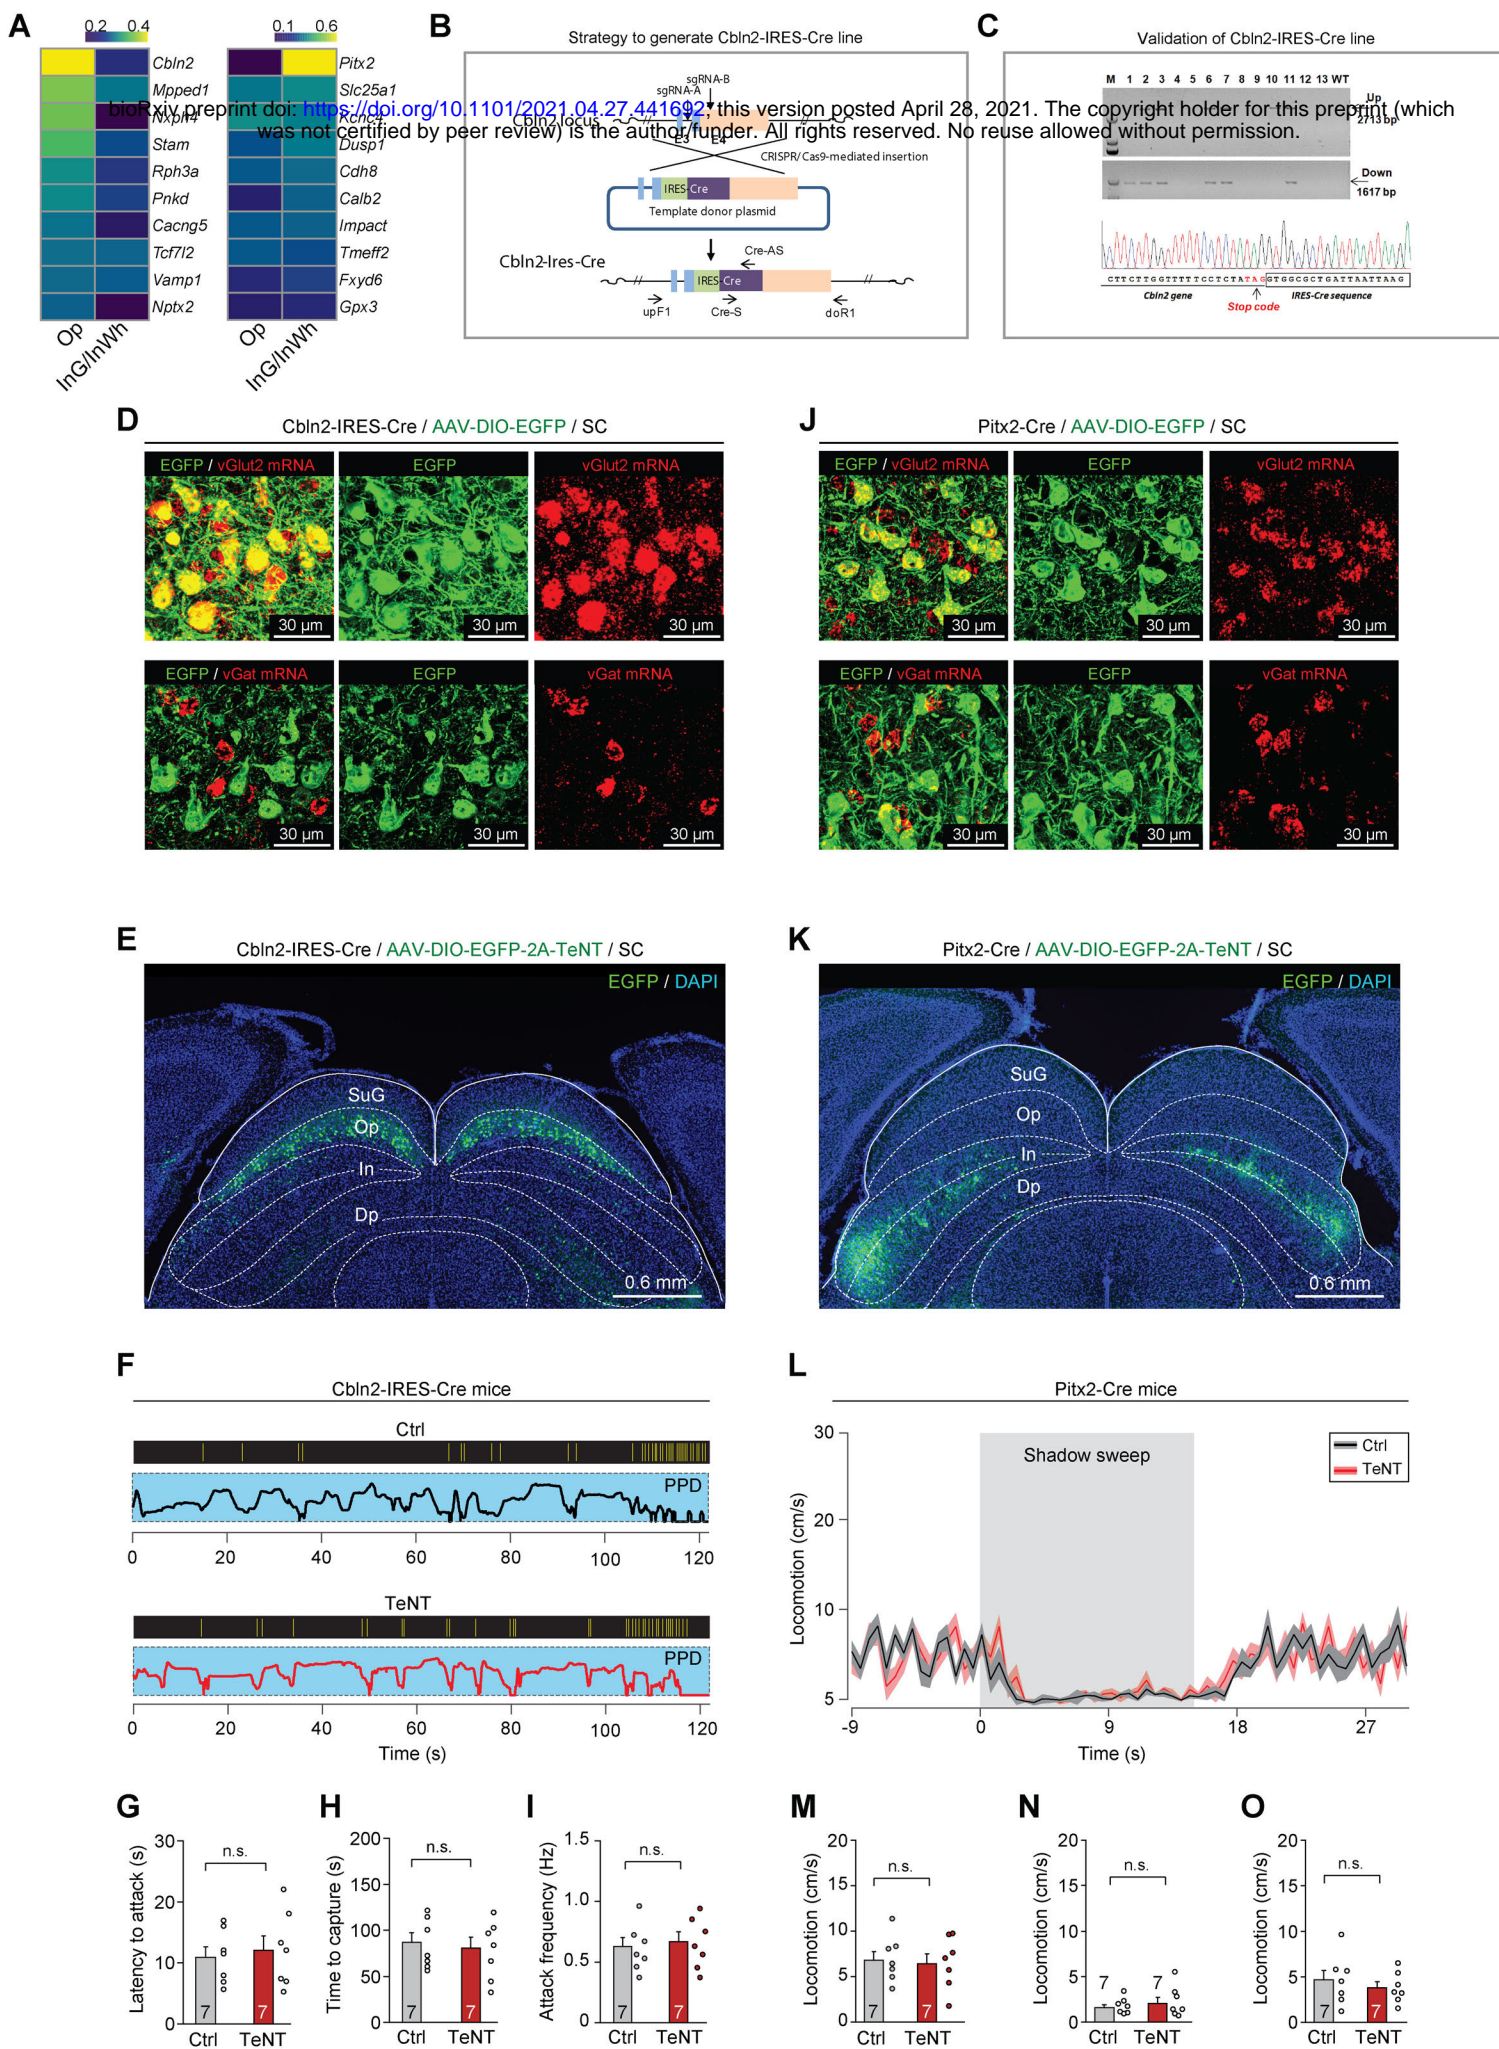

Figure S3 Generation of Cbln2-IRES-Cre line and Synaptic inactivations

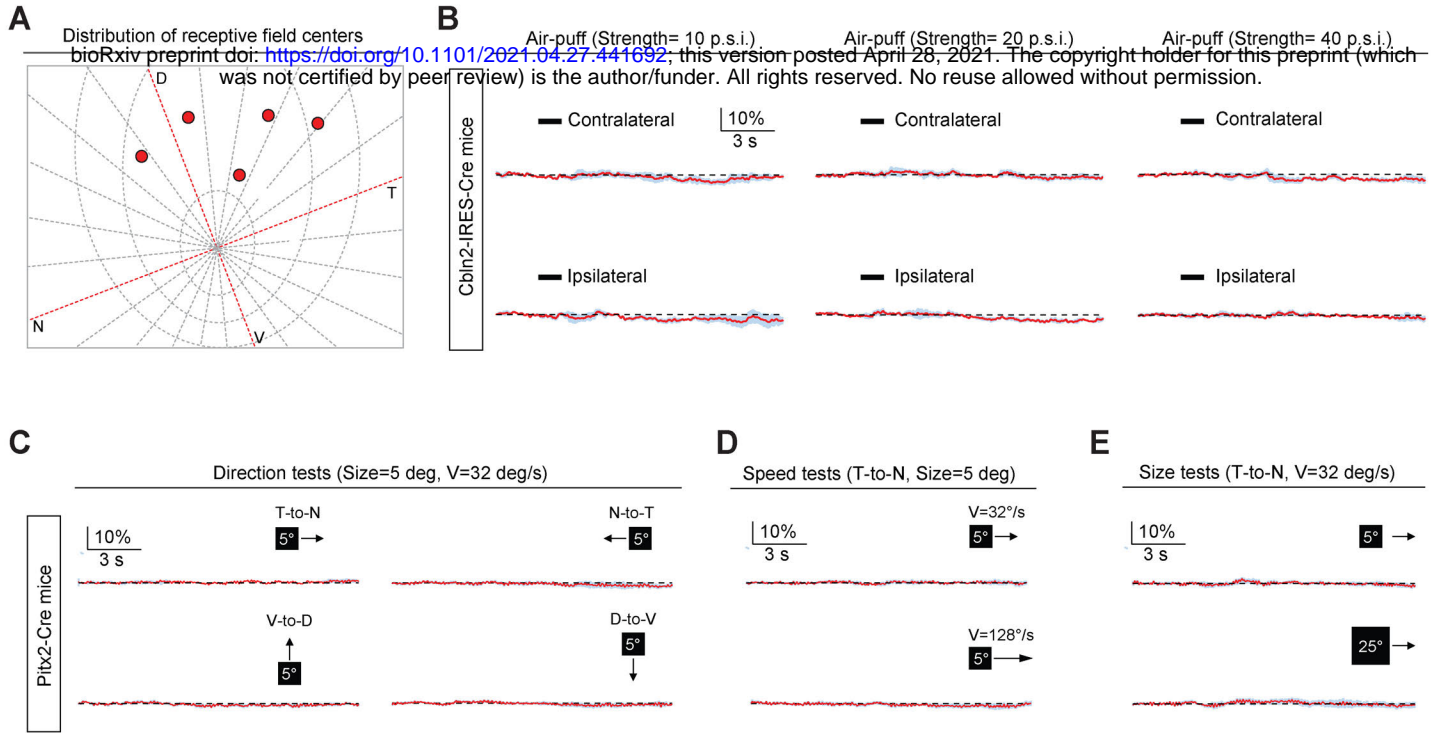

Figure S4 Fiber photometry



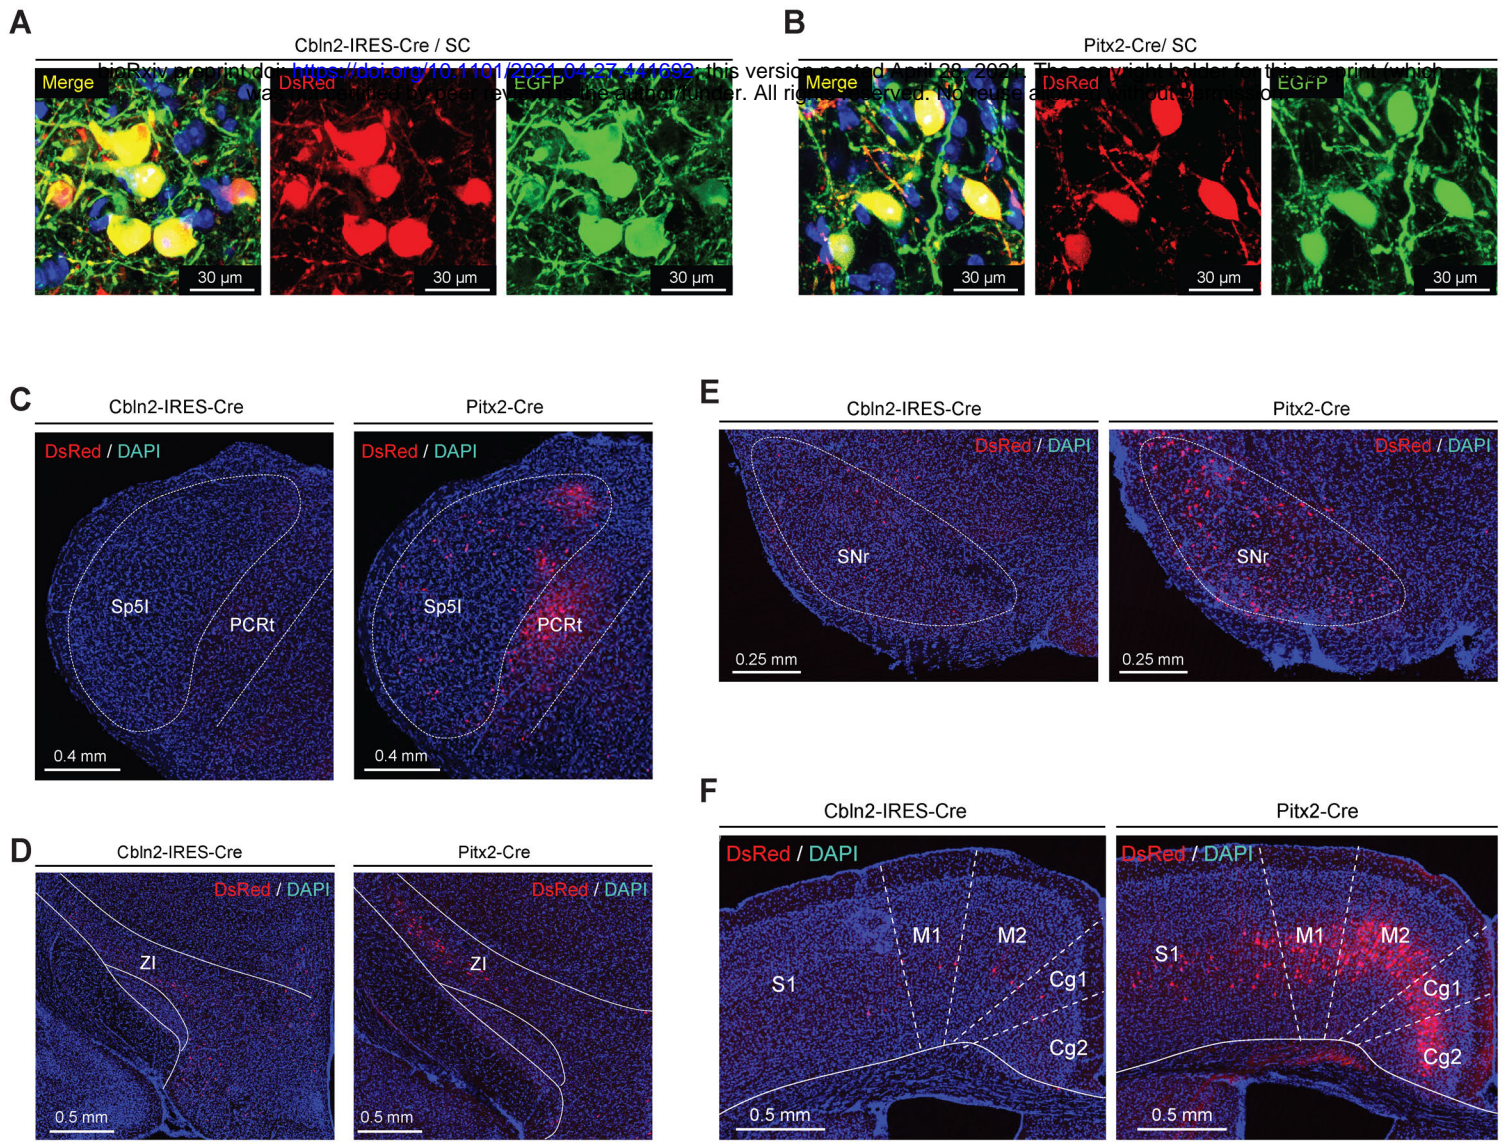

Figure S5 RV tracing

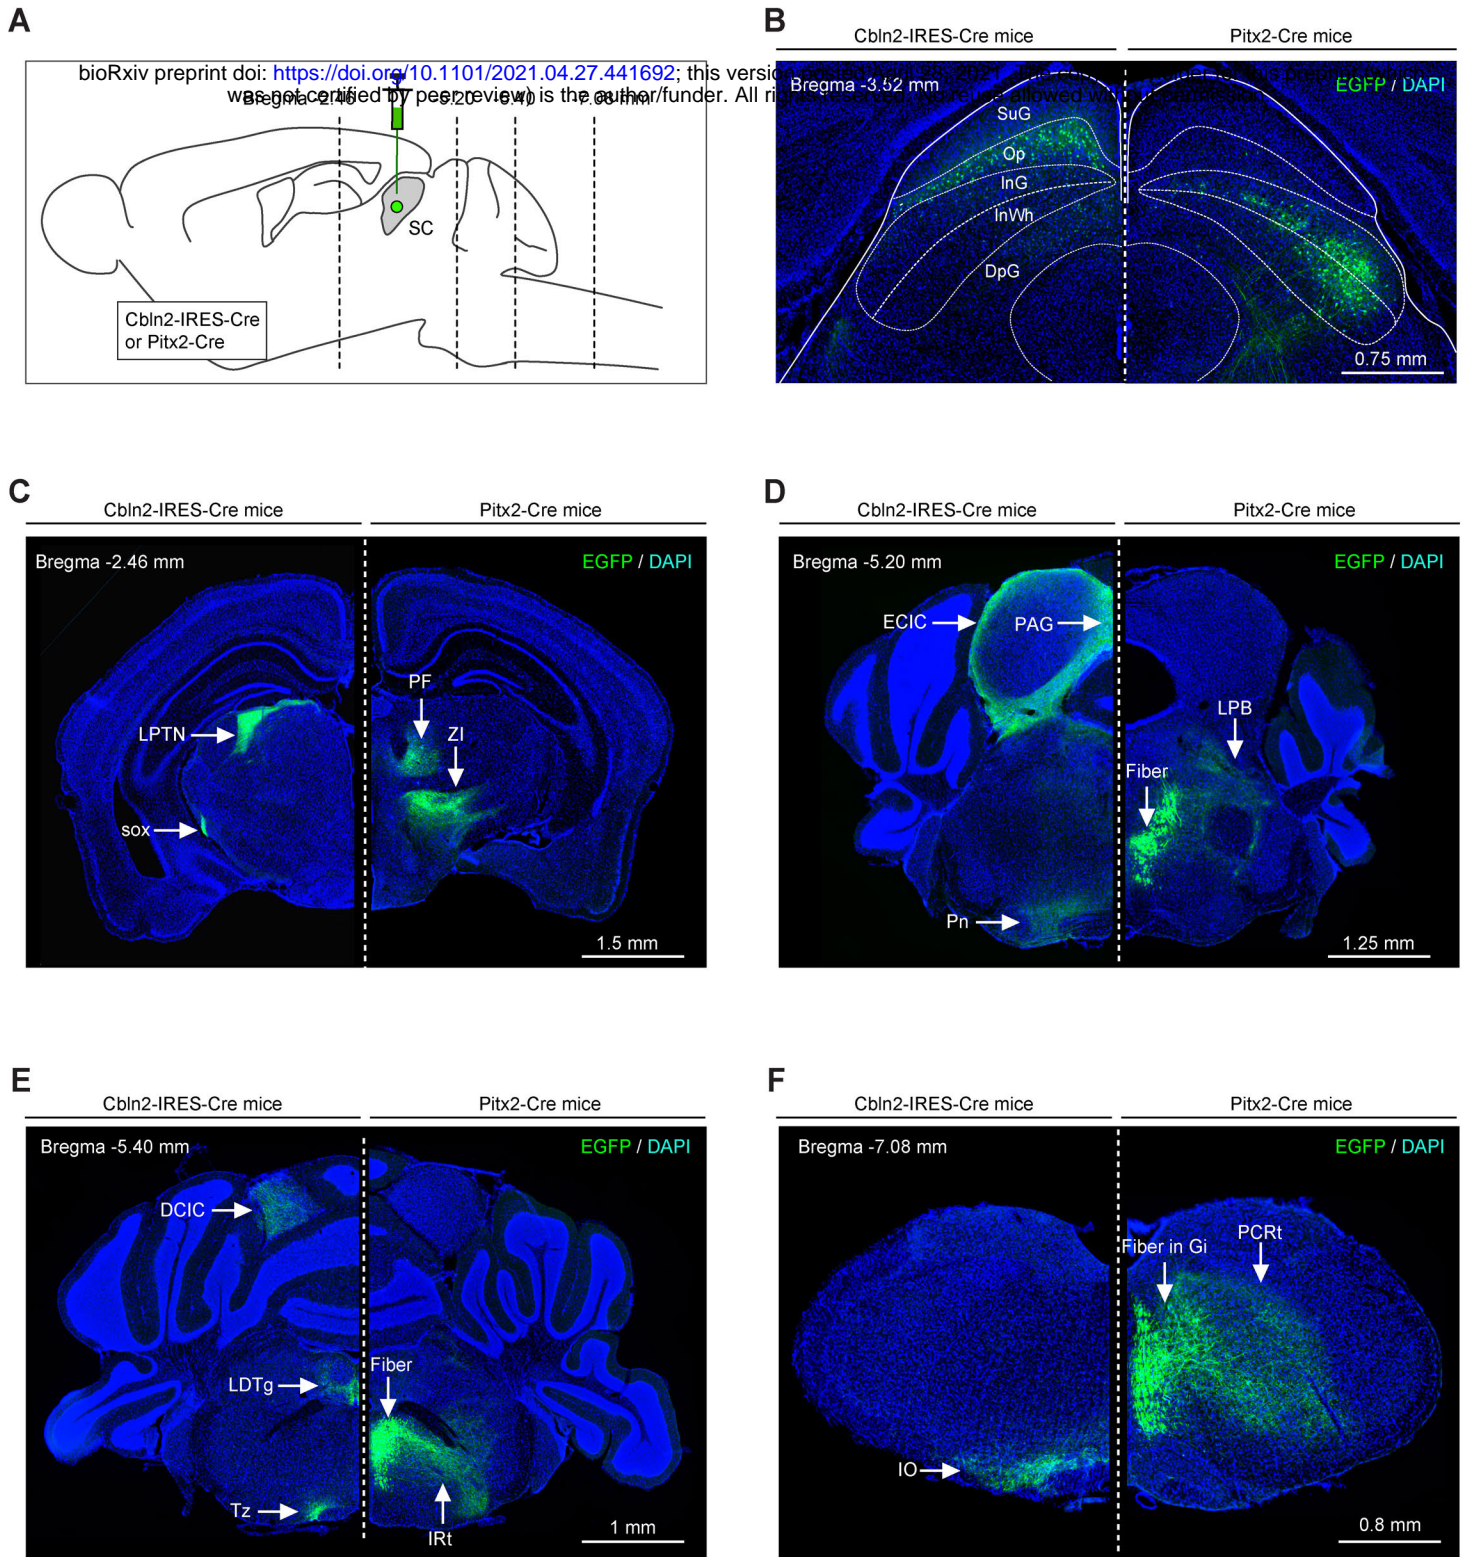

Figure S6 Divergent projections

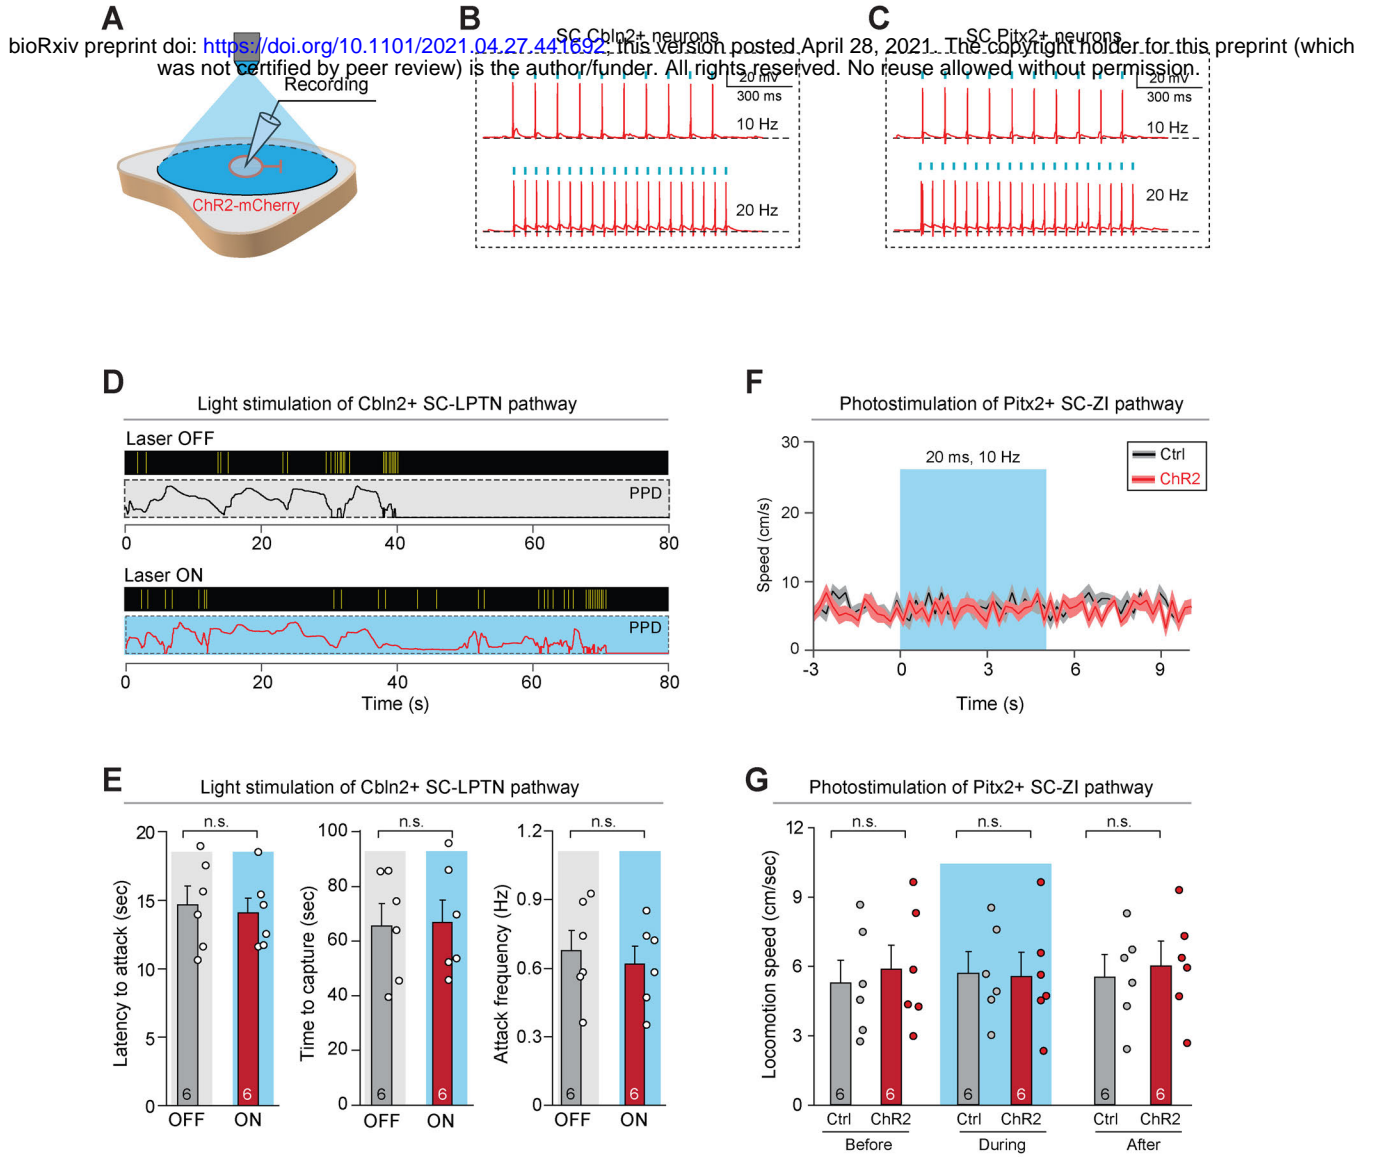

Figure S7 Pathway Activation
